# Supplementary material for: Establishment of a Mouse Model with Misregulated Chromosome Condensation due to Defective Mcph1 Function
Source: PLoS One. 2010 Feb 16;5(2):e9242. doi: 10.1371/journal.pone.0009242 (PMC2821930; doi:10.1371/journal.pone.0009242)
Supplement: Table S2 — Upregulated genes (Diff_Score ≥13/P≤0.05) in different Mcph1gt/gt tissues. (0.57 MB XLS) [file pone.0009242.s006.xls]

## Sheet: A
Upregulated genes (Diff_Score≥13/P≤0.05) in brain of Mcph1gt/gt mice.
Gene	Signal intensity (3 wild type mice)	Signal intensity (3 Mcph1gt/gt mice)	Detection rate (3 wild type mice)	Detection rate (3 Mcph1gt/gt mice)	Diff_Score (Mcph1gt/gt / wild type)	Target ID	Accession	Synonyms	Transcript ID
Homer1	291.1	344.3	1	1	13.0067	scl0003674.1_941-S	NM_152134.1	SYN47;Ves-1	scl0003674.1_941
Prosc	90.8	133.8	0.9994	1	13.0174	scl0114863.5_23-S	NM_054057.1	2200002F22Rik	scl0114863.5_23
Ibtk	203.6	248.5	1	1	13.0383	scl35535.28_151-S	XM_135030.4		scl35535.28_151
Gabrg2	505.9	611.6	1	1	13.0572	scl014406.1_194-S	NM_008073.1	Gabrg-2;gamma2	scl014406.1_194
Bach	821.9	952.3	1	1	13.0598	scl0002866.1_3-S	NM_133348.1	2410041A17Rik;ACH1;ACT;CTE-II;LACH1	scl0002866.1_3
Pfkm	242.9	357.8	1	1	13.0633	scl018642.4_28-S	NM_021514.2	PFK-M;Pfka	scl018642.4_28
Nasp	69.4	87.6	0.9981	0.9994	13.0655	scl0050927.2_48-S	NM_016777.2	5033430J04Rik;Epcs32	scl0050927.2_48
Ngfrap1	1814.2	2098	1	1	13.1125	scl54613.4.1_8-S	NM_009750.1	Bex3;DXWsu67e;Nade	scl54613.4.1_8
Gjb6	1039.2	1234.5	1	1	13.1161	scl45492.3_565-S	NM_008128.3	Cx30;D14Bwg0506e	scl45492.3_565
Dhrs7	66.2	84.3	0.9975	0.9994	13.1169	scl0002381.1_12-S	NM_025522.1	2310016E22Rik;retDSR4;retSDR4	scl0002381.1_12
1110020M19Rik	64.8	81.1	0.9969	0.9994	13.1302	scl22594.5_86-S	NM_027927	2810027J24Rik;4930529N21Rik;A230056J18Rik	scl22594.5_86
2010311D03Rik	100.7	122	0.9994	0.9994	13.1589	scl19300.3.1_12-S	NM_133839.1		scl19300.3.1_12
1810057C19Rik	129.4	156.8	0.9994	1	13.1708	scl41049.3_319-S	NM_026433.1		scl41049.3_319
Msr2	-8	5.5	0.0137	0.8721	13.1796	scl0001944.1_101-S	NM_030707	2810439C17Rik;9330158F12;IFGP2;IgSR;MMAN-g	scl0001944.1_101
Dmtf1	57.3	72.8	0.9963	0.9988	13.2007	scl0004045.1_65-S	NM_011806.2	Dimp;Dmp1	scl0004045.1_65
Fbxl17	232.2	272.9	1	1	13.2079	scl49708.14_0-S	XM_128716.2		scl49708.14_0
H3f3b	348.4	407.3	1	1	13.2101	scl0015081.1_185-S	NM_008211.2	H3.3B	scl0015081.1_185
Ube2g1	92	118.1	0.9994	0.9994	13.2167	scl0001439.1_101-S	NM_025985.2	2700059C12Rik;AI256795;AU014992;D130023C12Rik	scl0001439.1_101
Lypla1	61.7	89.6	0.9963	0.9994	13.2184	scl000965.1_10-S	NM_008866.2	Pla1a	scl000965.1_10
Bcl2a1b	15.6	37.5	0.9719	0.9956	13.2212	scl0012045.1_114-S	NM_007534	A1-b	scl0012045.1_114
Sec23a	67.1	83.8	0.9981	0.9994	13.2365	scl0020334.2_256-S	NM_009147.1	Sec23r	scl0020334.2_256
Serpina3g	31.4	53.9	0.9919	0.9981	13.2399	scl020715.6_281-S	XM_354694.1		scl020715.6_281
Zfp207	95.8	124.6	0.9994	0.9994	13.2474	scl0022680.1_25-S	NM_011751.1	8430401D15Rik;Zep	scl0022680.1_25
2700029M09Rik	1014.4	1176	1	1	13.2476	scl0072612.1_89-S	XM_134183.4		scl0072612.1_89
Atp6v1d	905	1064.9	1	1	13.2488	scl0073834.1_147-S	NM_023721.1	1110004P10Rik;Atp6m;VATD;Vma8	scl0073834.1_147
Nudt6	15.3	42.5	0.9726	0.9963	13.2517	scl22226.9.1_81-S	NM_153561.1	MGC27904	scl22226.9.1_81
Glra2	134.1	168.2	0.9994	1	13.2572	scl53601.9_324-S	NM_183427.1		scl53601.9_324
Dpysl2	4300.8	4974.1	1	1	13.2708	scl0012934.1_152-S	NM_009955.2	Crmp2;DRP2;Musunc33;TOAD-64;Ulip2	scl0012934.1_152
2610204L23Rik	87.8	107.4	0.9988	0.9994	13.2779	scl067163.2_42-S	NM_026009.1	asp4	scl067163.2_42
Pcmt1	227.8	298.7	1	1	13.2814	scl0003838.1_10-S	NM_008786.1	PIMT	scl0003838.1_10
Rab3b	98.6	135.9	0.9994	1	13.2822	scl25136.5_423-S	NM_023537.4	2610528C18Rik	scl25136.5_423
Bcar1	335.9	394.2	1	1	13.2841	scl34310.8_274-S	NM_009954.2	Cas;Crkas	scl34310.8_274
Slc16a6	20	31.5	0.9819	0.9944	13.2866	scl39393.9_71-S	NM_134038	ESTM12;MCT6;MGC27628	scl39393.9_71
Npn3	237.2	278.9	1	1	13.3095	scl076650.2_4-S	NM_029688.2		scl076650.2_4
Magmas	488.8	569.3	1	1	13.3316	scl0001814.1_15-S	NM_025571.1	2010110I09Rik;CGI-136	scl0001814.1_15
Mog	616.3	811.5	1	1	13.3328	scl017441.3_16-S	NM_010814.1		scl017441.3_16
Lxn	683.2	845.9	1	1	13.3537	scl22088.5.1_88-S	NM_016753.2		scl22088.5.1_88
Hspd1	144.7	238.4	0.9994	1	13.358	scl000928.1_86-S	NM_010477.2	60kDa;Hsp60	scl000928.1_86
D330026I07Rik	-1.7	8.6	0.4616	0.9457	13.3608	scl0319401.1_141-S			scl0319401.1_141
1810003N24Rik	220	279.8	1	1	13.3699	scl40498.6_62-S	NM_025443.1		scl40498.6_62
Bhlhb9	776.5	926	1	1	13.3726	scl54620.5_512-S	NM_198161.1		scl54620.5_512
2310001H12Rik	18.3	29.5	0.9782	0.9938	13.3739	scl0069504.1_70-S	NM_145563.1		scl0069504.1_70
Tram1	25.8	38.5	0.9875	0.9956	13.3884	scl16982.5.1_3-S	NM_028173.1	1810049E02Rik;MGC1174;TRAMP	scl16982.5.1_3
Wars	40.2	59.2	0.995	0.9981	13.3885	scl0002319.1_93-S	NM_011710.2	WRS	scl0002319.1_93
Pak2	16.7	27.9	0.9744	0.9938	13.3945	scl00224105.1_125-S	XM_358817.1	A130002K10Rik;D16Ertd269e;PAK-2	scl00224105.1_125
1500016F02Rik	21.2	34	0.9844	0.995	13.4009	scl33016.3_89-S			scl33016.3_89
Stk17b	91.3	119.8	0.9994	0.9994	13.4172	scl16765.7_355-S	NM_133810.2	3110009A03Rik;Drak2	scl16765.7_355
Eltd1	69.7	108.7	0.9981	0.9994	13.4202	scl22460.17_298-S	NM_133222.1	Etl;ETL1	scl22460.17_298
Cntn6	213.9	278.2	1	1	13.4393	scl29684.24.1_24-S	NM_017383.2	NB-3	scl29684.24.1_24
AA960558	36.2	53.1	0.9938	0.9969	13.4487	scl0101476.5_13-S	NM_133942.1	C920009D07Rik	scl0101476.5_13
Cops5	343	412.5	1	1	13.4532	scl16995.8.6_15-S	NM_013715.1	Jab1;Mov34;Sgn5	scl16995.8.6_15
Psmd7	320.1	422	1	1	13.4551	scl000612.1_15-S	NM_010817.1	Mov-34;Mov34	scl000612.1_15
Gemin6	52.3	67.3	0.9963	0.9981	13.4681	scl0067242.1_20-S	NM_026053.1	2610019B15Rik;2810470M17Rik	scl0067242.1_20
1190002H23Rik	332.1	434.5	1	1	13.4927	scl45267.5.1_68-S	NM_025427.1		scl45267.5.1_68
Ddah1	474.9	569.2	1	1	13.5061	scl0069219.2_49-S	NM_026993.1	2410006N07Rik;2510015N06Rik	scl0069219.2_49
A930031L14Rik	41.5	58.9	0.995	0.9981	13.5106	scl28061.5_29-S	XM_485569		scl28061.5_29
2310032D16Rik	9.4	25.4	0.9226	0.9931	13.5363	scl0003095.1_34-S	NM_027096.1	2310004G06Rik;mKIAA1434	scl0003095.1_34
LOC224163	628.8	764.4	1	1	13.5487	GI_38079951-S	XM_147236.2		GI_38079951
Lsamp	90.6	113.7	0.9994	0.9994	13.5518	scl0001826.1_137-S	NM_175548.2	5430428I19;B130007O04Rik;Lam;Lamp	scl0001826.1_137
Trim33	90.5	114.1	0.9994	0.9994	13.5562	scl0094093.2_2-S	NM_053170.1	mKIAA1113	scl0094093.2_2
Wasf1	2239.2	2659.5	1	1	13.5772	scl083767.9_235-S	NM_031877.2	Scar;WAVE-1	scl083767.9_235
Alg6	182.8	223.5	1	1	13.5802	scl25243.13_475-S	NM_178784	E230028F23Rik	scl25243.13_475
2310005E10Rik	358.8	431.5	1	1	13.5875	scl0067861.2_64-S	NM_172398.2		scl0067861.2_64
Uap1	115.8	227	0.9994	1	13.5878	scl15961.15.1_3-S	NM_133806.2	AgX;AGX-1;AGX-2;AGX1;ESTM38;SPAG2	scl15961.15.1_3
Lamp2	24.8	39.8	0.9875	0.9956	13.5946	scl0002992.1_44-S	NM_010685.2	CD107b;Lamp-2	scl0002992.1_44
Sqle	121	163.1	0.9994	1	13.6166	scl0002494.1_23-S	NM_009270.2		scl0002494.1_23
Rpl7a	903.8	1063.2	1	1	13.6174	scl027176.1_29-S	NM_013721	Surf-3;Surf3	scl027176.1_29
Dnaja4	191	226.6	1	1	13.631	scl36939.8_109-S	NM_021422.2	1110021L12Rik;Dj4;Hsj4	scl36939.8_109
Ndufa4	5401	6492.6	1	1	13.6316	scl017992.3_16-S	NM_010886.1	MLRQ	scl017992.3_16
Rab12	219.2	274.3	1	1	13.6328	scl0019328.2_52-S	NM_024448.1	2900054P15Rik	scl0019328.2_52
Phlda3	25.2	58.6	0.9875	0.9981	13.6402	scl17433.3.1_30-S	NM_013750.1	Tih1	scl17433.3.1_30
Ilf2	676	787.4	1	1	13.6478	scl067781.14_22-S	NM_026374	6230405A16Rik	scl067781.14_22
Tnfaip1	617.5	719.6	1	1	13.6485	scl39881.7_182-S	NM_009395.2	Edp-1;Edp1;Tnfip1	scl39881.7_182
Erdr1	141.6	360	0.9994	1	13.658	scl00170942.1_90-S	NM_133362.1	edr;MGC5764	scl00170942.1_90
A830007P12Rik	39.3	54.1	0.995	0.9969	13.6687	scl19579.2_109-S	NM_146115.2	MGC7940	scl19579.2_109
Hrb	267.8	343.8	1	1	13.6754	scl17740.13_298-S	NM_010472.1	C130049H11Rik;D730048C23Rik;RAB;Rip	scl17740.13_298
4933426L22Rik	60.5	76.8	0.9963	0.9994	13.6825	scl0071098.2_41-S	NM_027672.1		scl0071098.2_41
2700092H06Rik	74.5	92.6	0.9981	0.9994	13.6962	scl078325.1_150-S	XM_132529.2		scl078325.1_150
Atp6ap2	428.9	595.2	1	1	13.7004	scl0002891.1_24-S	NM_027439.2	5730403E06Rik;APT6M8-9;Atp6ip2;ATP6M8-9;M8-9	scl0002891.1_24
2810008M24Rik	380.2	506.6	1	1	13.7036	scl44416.3_31-S			scl44416.3_31
1500010M16Rik	2774.3	3269.7	1	1	13.7112	scl36337.4.1_30-S	NM_026892.1	3110001N14Rik;Gc20	scl36337.4.1_30
Mcts1	348.1	435.1	1	1	13.7245	scl54976.5.1_9-S	NM_026902.1	1500019M23Rik;MCT-1	scl54976.5.1_9
Gpr108	50.7	67.7	0.9963	0.9981	13.7304	scl49741.2.5_1-S	NM_030084.2	1810015L19Rik	scl49741.2.5_1
Tmem14c	996.4	1159.3	1	1	13.7324	scl066154.6_169-S	NM_025387.1		scl066154.6_169
Tomm7	701.5	867	1	1	13.7336	scl066169.3_11-S	NM_025394	1110020J08Rik;TOM7	scl066169.3_11
Zfp289	52.1	67.4	0.9963	0.9981	13.7353	scl0077038.2_31-S	NM_023854.1	2310032E02Rik	scl0077038.2_31
Wrnip1	136	168.1	0.9994	1	13.7761	scl0003612.1_5-S	NM_030215	4833444L21Rik;WHIP;Wrnip	scl0003612.1_5
Hadhb	99.9	151	0.9994	1	13.7774	scl0004026.1_20-S	NM_145558	4930479F15Rik;Mtpb	scl0004026.1_20
Pfkp	206	320.8	1	1	13.8043	scl0003729.1_9-S	NM_019703.2	1200015H23Rik;9330125N24Rik;PFK-C	scl0003729.1_9
LOC382063	1145	1388.5	1	1	13.8115	GI_38089740-S	XM_356143.1		GI_38089740
Magoh	109.3	133.1	0.9994	1	13.8164	scl0002678.1_34-S	NM_010760.1		scl0002678.1_34
6330503K22Rik	326.8	400.6	1	1	13.8166	scl0101565.9_22-S	NM_182995.1	AI427129	scl0101565.9_22
Gars	2249.3	2629.3	1	1	13.8331	scl30011.18.1_29-S	NM_180678.2		scl30011.18.1_29
Tcp1	32.7	47.2	0.9919	0.9969	13.8335	scl0001621.1_13-S	NM_013686	c-cpn;CCT;Cct1;Ccta;p63;Tcp-1;Tp63;TRic	scl0001621.1_13
Zfp131	336.8	395.4	1	1	13.8397	scl072465.7_112-S	NM_028245.1	2610109I01Rik;Znf131	scl072465.7_112
Dscr1l2	711.7	836.5	1	1	13.847	scl0053902.1_216-S	NM_022980.2		scl0053902.1_216
Ppil3	73	96.9	0.9981	0.9994	13.8484	scl0001010.1_64-S	NM_027351	2310076N22Rik;2510026K04Rik;Cyp10l	scl0001010.1_64
Gsta4	897.4	1047.1	1	1	13.8511	scl36679.7.1_96-S	NM_010357.1	mGsta4	scl36679.7.1_96
Dhrs6	35.6	50.8	0.9931	0.9969	13.8561	scl22583.12.1_160-S	NM_027208.1	1810026B04Rik	scl22583.12.1_160
Nxph2	33	46.9	0.9925	0.9969	13.8628	scl21207.2_565-S	NM_008752.1		scl21207.2_565
Dnm1l	183.5	219.1	1	1	13.8656	scl0074006.2_261-S	NM_152816.1	6330417M19Rik;Drp1	scl0074006.2_261
Gcs1	248.6	316.1	1	1	13.8662	scl29846.4_459-S	NM_020619.2	1810017N02Rik	scl29846.4_459
AW496496	78.4	104.1	0.9981	0.9994	13.8747	GI_38079977-S	XM_132086.3		GI_38079977
Ostf1	176.3	209.7	1	1	13.8782	scl52675.8.401_6-S	NM_017375.1	Sh3d3;SH3P2	scl52675.8.401_6
1700034P14Rik	551	643.7	1	1	13.8785	scl073274.2_7-S	NM_028487.2	GPBP;mGPBP	scl073274.2_7
D19Wsu12e	245.2	309.5	1	1	13.881	scl52590.16_341-S	XM_358328.1		scl52590.16_341
Drap1	2168.1	2588	1	1	13.8911	scl53495.6.1_70-S	NM_024176.1	2310074H19Rik	scl53495.6.1_70
A230046K03Rik	516.7	630.1	1	1	13.9082	scl38623.34_689-S	XM_193573.3		scl38623.34_689
1200013F24Rik	18.8	30.3	0.9788	0.9938	13.927	scl0001920.1_13-S	NM_025822.2		scl0001920.1_13
4933439J20Rik	26.9	43.5	0.9888	0.9963	13.9367	ri|4933439J20|PX00021H18|AK030267|2454-S	AK030267		ri|4933439J20|PX00021H18|AK030267|2454
Pdk3	136.8	164.2	0.9994	1	13.9396	scl54041.11.98_19-S	NM_145630.1	2610001M10Rik;MGC6383	scl54041.11.98_19
Ube2g1	278.4	344.5	1	1	13.9475	scl067128.8_166-S	NM_025985.2	2700059C12Rik;AI256795;AU014992;D130023C12Rik	scl067128.8_166
5730427N09Rik	775.1	904.1	1	1	13.9506	scl059050.2_22-S	NM_021552.1	LNR42;Nsa2p;Yr29	scl059050.2_22
LOC209281	15.4	28.5	0.9694	0.9938	13.9674	GI_38085104-S	XM_140715.2		GI_38085104
Clic4	65.7	96.1	0.9975	0.9994	13.9787	scl0029876.1_51-S	XM_124389.1	mc3s5;mtCLIC	scl0029876.1_51
Cyp2j9	209.1	264.2	1	1	13.9971	scl074519.1_143-S	NM_028979.1	8430417E17Rik	scl074519.1_143
Prkrip1	118.9	143.8	0.9994	1	14.0257	scl066801.6_14-S	NM_025774.1	8430424D23Rik;C114	scl066801.6_14
H2-T22	27.2	41	0.9888	0.9956	14.0594	scl015039.10_13-S	NM_010397.2	H-2T22	scl015039.10_13
Lman2l	662.9	776.8	1	1	14.0702	scl0214895.1_30-S	XM_129848.4		scl0214895.1_30
Zfp99	192.5	230.2	1	1	14.1406	scl25783.3.1_76-S	NM_023322.1	2310046C23Rik;2810437E14Rik	scl25783.3.1_76
9430010O03Rik	1398	1629.7	1	1	14.1484	scl00234023.2_117-S	NM_176849.2	C130008N12	scl00234023.2_117
Vcam1	226.8	277	1	1	14.1659	scl0022329.2_144-S	NM_011693.2	CD106;Vcam-1	scl0022329.2_144
Htr1d	41.6	55.8	0.995	0.9981	14.1735	scl24813.3_604-S	NM_008309.2	Gpcr14	scl24813.3_604
1700095N21Rik	36.5	50.1	0.9938	0.9969	14.1913	scl076630.10_6-S	NM_029682.2	ALMalpha;AMSH-FP	scl076630.10_6
LOC279260	3.5	15.2	0.7754	0.9788	14.1979	GI_38078929-S	XM_205477.2		GI_38078929
2010107E04Rik	1852.1	2158.4	1	1	14.198	scl070257.1_12-S	NM_027360.1	9430003J03Rik	scl070257.1_12
Slc2a3	1582.1	1851.8	1	1	14.2282	scl28438.14_163-S	NM_011401.2	Glut-3;Glut3	scl28438.14_163
Fkbp14	153.1	185.3	1	1	14.242	scl0231997.1_5-S	NM_153573.1		scl0231997.1_5
2310036D22Rik	177.2	211.5	1	1	14.2804	scl30378.11_478-S	NM_027992	5830455K21Rik;6430519M21Rik	scl30378.11_478
Zbtb24	141.1	169.7	0.9994	1	14.2824	scl38986.7.1_55-S	NM_153398.2		scl38986.7.1_55
Acsl6	84.9	107.9	0.9988	0.9994	14.2965	scl41558.22.1_2-S	NM_144823.1	A330035H04Rik;AW050338;Facl6;LACS;Lacsl;MGC36650	scl41558.22.1_2
Mrrf	50.3	67.4	0.9963	0.9981	14.3003	scl0003223.1_29-S	NM_026422.1	2400002D02Rik;MRFF;MTRRF;RRF	scl0003223.1_29
Acvr1	60	76.7	0.9963	0.9994	14.3117	scl0011477.2_228-S	NM_007394.2	ActR-I;ActRIA;Acvr;Acvrlk2;ALK2;D330013D15Rik;SKR1;Tsk7L	scl0011477.2_228
Wdr1	547.4	641.6	1	1	14.3298	scl26663.16_246-S	NM_011715.1	D5Wsu185e	scl26663.16_246
2410042D21Rik	11	23.1	0.9414	0.9906	14.4156	scl0003391.1_153-S	NM_024254.2		scl0003391.1_153
9430098E02Rik	34.9	64.7	0.9938	0.9981	14.4335	scl33704.1.431_29-S	XM_134253.3		scl33704.1.431_29
Nqo2	28.3	41.7	0.99	0.9963	14.4349	scl0003622.1_15-S	NM_020282.2	NMO2;Nmor2;Ox-2;Ox2	scl0003622.1_15
Zfp180	712.6	891	1	1	14.4464	scl00210135.1_76-S	NM_172483.1	2310040I01Rik;D130011P11;HHZ168	scl00210135.1_76
Rasgrp3	218.1	281.7	1	1	14.5031	scl0240168.18_64-S	NM_207246.2	MGC74365;MGC79207	scl0240168.18_64
Abcf2	294.8	374.5	1	1	14.5387	scl0027407.2_100-S	NM_013853.1	0710005O05Rik;D13Ertd614e;E430001O06	scl0027407.2_100
S100a1	728.9	892.9	1	1	14.5528	scl21916.1_21-S	NM_011309.2		scl21916.1_21
B930008K04Rik	69.5	87.7	0.9981	0.9994	14.5601	scl00215693.1_84-S	NM_175446.2	A230096A06	scl00215693.1_84
Eef1b2	401.4	492.2	1	1	14.5716	scl055949.3_17-S	NM_018796.2	2810017J07Rik;Eef1b	scl055949.3_17
6330414G21Rik	19	65.3	0.9813	0.9981	14.5918	scl24927.7_348-S	NM_178110.2		scl24927.7_348
Hs3st1	467	549.2	1	1	14.6078	scl26655.5_57-S	NM_010474.1	3-OST;D5Wsu110e;Hsg3ost	scl26655.5_57
Snrpb	509.7	602.5	1	1	14.6184	scl0003098.1_1-S	NM_009225.1	SM-B;SM11;SMB;SNRNP-B	scl0003098.1_1
Lix1	19.7	31.8	0.9813	0.9944	14.6313	scl0066643.1_65-S	NM_025681.1	5730466L18Rik	scl0066643.1_65
Gprasp2	1161.8	1383.2	1	1	14.6371	scl54621.6_157-S	XM_142154.2		scl54621.6_157
1110017C15Rik	184.4	220.3	1	1	14.6374	scl000639.1_71-S	NM_025391.1		scl000639.1_71
Endogl1	18.9	34	0.9782	0.995	14.6464	scl0003561.1_54-S	NM_172456.1	4732466J24;ENDOGL2;ENGL;ENGL-a;ENGL-B	scl0003561.1_54
LOC382020	688.1	876.1	1	1	14.6574	GI_38089330-S	XM_356090.1		GI_38089330
Laptm4a	784.4	919.9	1	1	14.7085	scl43398.10.1_4-S	NM_008640.1	LAPTM4;mKIAA0108;MTP;Mtrp	scl43398.10.1_4
Rab18	18.6	30.7	0.9782	0.9944	14.7149	scl52274.9_385-S	NM_011225		scl52274.9_385
1110021H02Rik	1002.4	1174.6	1	1	14.7383	scl15945.4.1_0-S	NM_025388.1	ESTM29	scl15945.4.1_0
D14Ertd226e	195.4	233.3	1	1	14.7432	scl45684.12_151-S	NM_145928	MGC36554	scl45684.12_151
1110017C15Rik	65	82.8	0.9975	0.9994	14.7638	scl066164.1_0-S	NM_025391		scl066164.1_0
D930035B09Rik	-0.2	11.4	0.5658	0.9626	14.7691	scl24859.6.20_8-S	NM_172876.1	D930035B09	scl24859.6.20_8
Armcx1	183.4	231.4	1	1	14.8013	scl54629.5_192-S	NM_030066.2		scl54629.5_192
Cryz	38	59.8	0.9944	0.9981	14.8116	scl0002125.1_16-S	NM_009968.1	SEZ9	scl0002125.1_16
mKIAA0718	90.5	133.1	0.9994	1	14.8269	scl0002343.1_498-S	AK122355		scl0002343.1_498
Fgf12	246.3	297.5	1	1	14.8641	scl48597.11_551-S	NM_183064.1	Fhf1	scl48597.11_551
Igbp1	303.5	359.5	1	1	14.867	scl54754.6.1_12-S	XM_196586.3	Pc52	scl54754.6.1_12
Yaf2	318.6	377.2	1	1	14.8916	scl46822.5_2-S	NM_024189.4	2810021M11Rik	scl46822.5_2
Hbb-b1	4109.2	8697.2	1	1	14.9218	ri|2510028J08|ZX00060I20|AK011016|628-S	AK011016		ri|2510028J08|ZX00060I20|AK011016|628
Cdk4	129.5	172	0.9994	1	14.9257	scl0003913.1_65-S	NM_009870.2	Crk3	scl0003913.1_65
1110018J18Rik	25.8	45.2	0.9875	0.9969	14.939	scl066129.2_5-S	NM_025370.1		scl066129.2_5
Robo1	188.7	236.9	1	1	14.9431	scl019876.3_41-S	NM_019413.1	DUTT1	scl019876.3_41
Gtl2	333.5	417.4	1	1	14.9625	scl0017263.2_159-S	NM_144513	2900016C05Rik;3110050O07Rik;6330408G06Rik;D12Bwg1266e;Meg3	scl0017263.2_159
3110001A13Rik	112.6	137.6	0.9994	1	14.9645	scl21336.8_145-S	NM_025626.3		scl21336.8_145
4930511J11Rik	63.6	81.3	0.9969	0.9994	14.984	scl48785.4.1_310-S	XM_148432.1		scl48785.4.1_310
	138.4	167.5	0.9994	1	14.9935	scl00238693.1_37-S	BC027395.1		scl00238693.1_37
C86073	307.6	428.5	1	1	15.0045	GI_85701607-S	NM_001033190.1		GI_85701607
Ddx5	56.9	97.9	0.9963	0.9994	15.0468	scl0013207.1_56-S	NM_007840.1	2600009A06Rik;G17P1;Hlr1;HUMP68;p68	scl0013207.1_56
9630019K15Rik	596.2	730.7	1	1	15.0603	scl51149.4_213-S	NM_178774.3		scl51149.4_213
Rps16	1649.5	1934.4	1	1	15.0683	scl020055.2_9-S	NM_013647.1		scl020055.2_9
Cldn10	1242.7	1458.9	1	1	15.1186	scl000293.1_16-S	NM_021386	6720456I16Rik;D14Ertd728e	scl000293.1_16
1600019D15Rik	423.2	502.6	1	1	15.1232	scl0067878.2_53-S	NM_028975.2	2410089A21Rik;2700052H22Rik;5430406L04Rik;db83	scl0067878.2_53
D130059O18Rik	109.7	152.6	0.9994	1	15.129	ri|D130059O18|PX00185A22|AK051608|1931-S	AK051608		ri|D130059O18|PX00185A22|AK051608|1931
Ccng1	67.6	95.8	0.9981	0.9994	15.1377	scl0012450.2_17-S	NM_009831.1	Ccng;cyclin G	scl0012450.2_17
Fosl2	146.9	220.5	0.9994	1	15.1709	scl0014284.1_16-S	NM_008037.3	Fra-2	scl0014284.1_16
Pscd3	256	308.2	1	1	15.1729	scl27010.17_214-S	NM_011182.2	Grp1	scl27010.17_214
Tde2	910.1	1140.8	1	1	15.1805	scl37947.10_418-S	NM_019760	1500011D18Rik;mKIAA1253;Tde1l;TMS-2;Tms2	scl37947.10_418
Supt4h2	907.4	1067	1	1	15.1939	scl0020923.1_202-S	NM_011509		scl0020923.1_202
Nek3	88	110.9	0.9988	0.9994	15.2079	scl35027.16.1_147-S	NM_011848.1		scl35027.16.1_147
Smyd1	26.3	43.6	0.9875	0.9969	15.2201	scl28887.12_50-S	NM_009762	4632404M21Rik;Bop;Zmynd18	scl28887.12_50
9330161C17Rik	171.4	210.5	1	1	15.2219	ri|9330161C17|PX00106I09|AK079084|1792-S	AK079084	1700007N03Rik;B230220N21	ri|9330161C17|PX00106I09|AK079084|1792
Egfl5	28.8	54.4	0.9919	0.9969	15.2344	scl00230316.2_241-S	NM_172694.1	4933405H16Rik;9630025C07;mKIAA0818	scl00230316.2_241
Bbs4	162.4	198.2	1	1	15.2589	scl35765.18_440-S	NM_175325.2	AW537059;D9Ertd464e	scl35765.18_440
Tcp1	852.3	1037.8	1	1	15.26	scl51111.10.24_9-S	NM_013686.1	c-cpn;CCT;Cct1;Ccta;p63;Tcp-1;Tp63;TRic	scl51111.10.24_9
Ddhd1	131.2	159.5	0.9994	1	15.2606	scl45663.15_583-S	NM_176845		scl45663.15_583
BC034507	6.7	18.6	0.8765	0.9863	15.2826	scl0004199.1_22-S	BC034507		scl0004199.1_22
BC027127	96.6	136.8	0.9994	1	15.2897	scl00211739.1_242-S	NM_145967.1	9330184N17Rik;MGC38877	scl00211739.1_242
Snx2	477.2	593.2	1	1	15.3165	scl067804.15_75-S	NM_026386.1	0610030A03Rik	scl067804.15_75
Insig1	38.2	58.7	0.9944	0.9981	15.3381	scl00231070.1_184-S	NM_153526.2	1810013C12Rik;Insig-1	scl00231070.1_184
Sumo2	997.6	1203.8	1	1	15.3447	scl0001373.1_2-S	NM_133354		scl0001373.1_2
Anxa2	401.5	475.8	1	1	15.3975	scl36760.13.1_118-S	NM_007585.2	Cal1h	scl36760.13.1_118
Tceb1	563.9	674.6	1	1	15.3991	scl16965.6_134-S	NM_026456.2	2610043E24Rik;2610301I15Rik;elongin C	scl16965.6_134
Nkx6-2	67.1	85.7	0.9981	0.9994	15.4185	scl30530.4.1_81-S	NM_183248.1	Gtx;Nkx6.2	scl30530.4.1_81
Atp5b	11160.8	13095.7	1	1	15.4295	scl38298.13.28_46-S	NM_016774.2		scl38298.13.28_46
Rnf14	54.8	83.7	0.9963	0.9994	15.4361	scl0002257.1_38-S	NM_020012.1	2310075C09Rik;2610005D23Rik;D18Ertd188e;D7Bwg0165e;Triad2	scl0002257.1_38
Rnf144	80.9	101.6	0.9988	0.9994	15.4364	scl42588.12.910_0-S	NM_080563.2	Ubce7ip4;UIP4	scl42588.12.910_0
2310067E08Rik	865.7	1020	1	1	15.4485	scl36223.4.1187_49-S	NM_028013.1	2210414F18Rik	scl36223.4.1187_49
Tmem10	156	238.6	1	1	15.4498	scl0226115.1_174-S	NM_153520.1	Tmp10	scl0226115.1_174
LOC382585	53.3	72	0.9963	0.9988	15.4508	GI_38049465-S	XM_356580.1		GI_38049465
Insig1	22.8	44.3	0.9863	0.9963	15.4559	scl0231070.3_29-S	NM_153526.2	1810013C12Rik;Insig-1	scl0231070.3_29
9130422G05Rik	121.4	149.7	0.9994	1	15.4725	scl0066819.2_213-S	NM_025782.2		scl0066819.2_213
2810411E22Rik	37.6	52.3	0.9944	0.9969	15.5036	GI_38091897-S	XM_126673.4		GI_38091897
Unc5b	174.1	209.9	1	1	15.5079	scl0107449.1_138-S	NM_029770.1	6330415E02Rik;Unc5h2	scl0107449.1_138
Zfp235	11.8	32.8	0.9476	0.995	15.5144	scl32973.3.1_23-S	NM_019941.1	0610030O19Rik	scl32973.3.1_23
Hoxb5	269.1	323.8	1	1	15.5184	scl40986.1_44-S	NM_008268.1	Hox-2.1	scl40986.1_44
Azi2	230.7	276	1	1	15.557	scl0003596.1_1065-S	NM_013727.2	AZ2	scl0003596.1_1065
C920006C10Rik	247.6	318.5	1	1	15.5818	scl076740.18_3-S	NM_133766.1	mKIAA0143	scl076740.18_3
Nsep1	660.9	851.4	1	1	15.5887	scl0002680.1_6-S	NM_011732.1	MSY1;Ybx1	scl0002680.1_6
1110006G06Rik	676.7	799.2	1	1	15.6085	scl31560.6.38_45-S	NM_028661.1	B230110F21Rik	scl31560.6.38_45
Ctns	201.5	245.4	1	1	15.6263	scl083429.1_139-S	NM_031251.2		scl083429.1_139
Smpdl3a	126.3	158.5	0.9994	1	15.6446	scl38908.9.1_88-S	NM_020561.1	0610010C24Rik;ASM3A;ASML3;ASML3A	scl38908.9.1_88
BC057022	286.9	342.1	1	1	15.6494	GI_51921354-S	NM_001004180.1	MGC67174	GI_51921354
Cetn3	560.8	663.3	1	1	15.6515	scl44578.8.1_13-S	NM_007684.2	MmCEN3	scl44578.8.1_13
D19Ertd144e	201.9	242.5	1	1	15.6525	scl52801.4.1_26-S	NM_026373.1	5830466O21Rik;Doc-1r	scl52801.4.1_26
Pmvk	67.2	86	0.9981	0.9994	15.6762	scl22972.7.87_15-S	NM_026784.1	1110011E12Rik;2900002L22Rik;PMK;PMKA;PMKASE	scl22972.7.87_15
mt-Nd1	3293.8	4102.6	1	1	15.6925	scl0017716.1_225-S			scl0017716.1_225
Arl8	16	31	0.9719	0.9944	15.7074	scl21260.7_101-S	NM_029466.2	4930587A11Rik	scl21260.7_101
Pdrg1	361.1	429.3	1	1	15.7482	scl068559.1_22-S	NM_178939.1		scl068559.1_22
Fgf9	194.5	234	1	1	15.7499	scl014180.2_25-S	NM_013518.1		scl014180.2_25
Idb2	22.4	35.3	0.9863	0.995	15.7515	scl42591.3.1_5-S	NM_010496.2	Id2	scl42591.3.1_5
Pnp	181	218.5	1	1	15.8251	scl018950.7_181-S	NM_013632.2	Np;Np-1;Np-2	scl018950.7_181
Tm4sf6	163.1	207.7	1	1	15.8323	scl53842.9_93-S	NM_019656	T245;Tm4sf;TSPAN-6;Tspan6	scl53842.9_93
Pdgfra	167.6	202.8	1	1	15.8388	scl27703.26_20-S	NM_011058.1	CD140a;Pdgfr-2	scl27703.26_20
Cox6c	950.3	1160.2	1	1	15.866	scl012864.3_58-S	NM_053071.1		scl012864.3_58
AU067744	1484.3	1788.4	1	1	15.8839	scl0214505.1_41-S	NM_172529.1	6430527N14Rik;A830081F19;Mdcp1	scl0214505.1_41
LOC383514	49.5	68.4	0.9963	0.9981	15.9129	GI_38049590-S	XM_357101.1		GI_38049590
Sec63	111.9	138	0.9994	1	15.9131	scl00140740.1_195-S	NM_153055.2	5730478J10Rik	scl00140740.1_195
1110008J03Rik	46	73.6	0.9956	0.9988	15.9189	scl26113.1.36_35-S	NM_029096.1	AI853657	scl26113.1.36_35
	996	1176.6	1	1	15.9388	mtDNA_ND2-S			mtDNA_ND2
0610009I22Rik	147.8	181.2	1	1	15.9778	scl20251.8_441-S	NM_025646	4930557M15Rik;5730490M08Rik	scl20251.8_441
D15Ertd405e	171.2	222.6	1	1	15.9799	scl0380967.6_277-S	NM_201359.1	MGC54819	scl0380967.6_277
2810405J04Rik	524.3	622	1	1	15.9863	scl072722.1_216-S	NM_133747.1		scl072722.1_216
Hmgcl	145.6	187.2	0.9994	1	15.9952	scl0002854.1_22-S	NM_008254.1	HL	scl0002854.1_22
4933424A20Rik	35.8	50.5	0.9938	0.9969	16.0035	scl076860.1_148-S			scl076860.1_148
2600016B03Rik	55	72.4	0.9963	0.9988	16.0057	scl34969.6.1_9-S	NM_026453.1		scl34969.6.1_9
Pdcd4	798.7	945.3	1	1	16.068	scl52979.12_115-S	NM_011050	D19Ucla1;MA-3;TIS	scl52979.12_115
0610039A15Rik	146.3	196.9	0.9994	1	16.0713	scl0001142.1_10-S	NM_175101.2	AW260416	scl0001142.1_10
9830124H08Rik	94.9	118.3	0.9994	0.9994	16.0939	scl0219105.1_166-S	NM_144842		scl0219105.1_166
Eif5	285.5	347.4	1	1	16.1084	scl00217869.1_91-S	NM_173363.2	D12Ertd549e;MGC36374;MGC36509	scl00217869.1_91
Mrps31	120.2	147.8	0.9994	1	16.116	scl000657.1_20-S	NM_020560.1	1500002D03Rik;Imogen38;Imogen44	scl000657.1_20
Lrrn1	308	367.9	1	1	16.1205	scl29678.2_366-S	NM_008516.1	NLRR-1	scl29678.2_366
Sec63	104.6	129.7	0.9994	1	16.1317	scl0140740.24_211-S	NM_153055.2	5730478J10Rik	scl0140740.24_211
Msrb	244.8	300	1	1	16.1538	scl21241.7.1_29-S	NM_029619.2		scl21241.7.1_29
Kctd4	31.9	50	0.9919	0.9969	16.1698	scl46086.2_122-S	NM_026214.2	2210017A09Rik	scl46086.2_122
Ap2m1	1710.7	2148.2	1	1	16.1856	scl011773.12_241-S	NM_009679.1		scl011773.12_241
LOC381946	316.2	583	1	1	16.1883	GI_38087856-S	XM_358681.1		GI_38087856
Mmp14	156.1	189.8	1	1	16.201	scl46305.13_322-S	NM_008608.2	MT1-MMP	scl46305.13_322
Camk4	11.2	24.2	0.9426	0.9931	16.202	scl0012326.1_171-S	NM_009793.1	CaMKIV;CaMKIV/Gr	scl0012326.1_171
1500031H04Rik	7018.7	8421.4	1	1	16.2163	scl54605.3_321-S	NM_025893.1		scl54605.3_321
2310061I09Rik	57.1	81.2	0.9963	0.9994	16.2593	scl0069668.1_19-S	XM_129811.2		scl0069668.1_19
1110060F11Rik	258	314.3	1	1	16.2619	scl23442.8_471-S	NM_026395.1	5830454N22Rik	scl23442.8_471
Cdr2	171.4	233	1	1	16.2667	scl30730.6_511-S	NM_007672.1		scl30730.6_511
LOC386333	1.8	15.3	0.6875	0.9825	16.27	GI_38081438-S	XM_359174.1		GI_38081438
9830132G07Rik	38.5	53.8	0.995	0.9975	16.2833	scl17396.12_278-S	NM_172643.1	9430031N01	scl17396.12_278
ORF28	95.7	119.5	0.9994	0.9994	16.2899	scl48205.2_588-S	XM_128363.1	MGC27620	scl48205.2_588
4930453N24Rik	135.3	165.6	0.9994	1	16.2988	GI_38079837-S	XM_148353.3		GI_38079837
Rnf14	187.1	226.5	1	1	16.3425	scl52040.12.1_6-S	NM_020012.1	2310075C09Rik;2610005D23Rik;D18Ertd188e;D7Bwg0165e;Triad2	scl52040.12.1_6
Slc25a19	51.2	79.2	0.9963	0.9994	16.3531	scl0001270.1_91-S	NM_026071.1	2900089E13Rik;DNC;MUP1	scl0001270.1_91
D5Wsu178e	78.5	105.2	0.9988	0.9994	16.3586	scl0028042.1_319-S	NM_027652.1	4933402G07Rik;KIAA1724;mKIAA1724;SELI	scl0028042.1_319
Smarca1	122.1	150.4	0.9994	1	16.3642	scl54295.26.1_21-S	NM_053123.3	5730494M04Rik;Snf2l	scl54295.26.1_21
Olfml3	80.3	105.6	0.9988	0.9994	16.3828	scl21737.4_335-S	NM_133859.1		scl21737.4_335
3010002I12Rik	9.1	24	0.9226	0.9906	16.3887	ri|3010002I12|ZX00055A20|AK013889|1042-S	AK013889		ri|3010002I12|ZX00055A20|AK013889|1042
Gpiap1	113.3	140.1	0.9994	1	16.4088	scl0053872.2_123-S	NM_016739.2	Gpiap;MMGPIP137;P137	scl0053872.2_123
Cnot7	94.1	129.4	0.9994	0.9994	16.47	ri|1810044B19|ZX00043A03|AK007767|732-S	AK007767	Caf1;Pop2	ri|1810044B19|ZX00043A03|AK007767|732
Ptgds	4343.2	5248.4	1	1	16.4767	scl19558.7.10_4-S	NM_008963.1	21kDa;L-PGDS;PGD2;Ptgs3	scl19558.7.10_4
Ccrk	123.8	159.9	0.9994	1	16.4913	scl44672.5.1_29-S	NM_053180.2		scl44672.5.1_29
LOC280487	98.7	142.9	0.9994	1	16.4947	GI_38081456-I	XM_207856.3		GI_38081456
Sdhb	572.7	698.8	1	1	16.5047	scl067680.5_8-S	NM_023374.3	0710008N11Rik	scl067680.5_8
Nap1l1	387.1	462.2	1	1	16.5062	scl0003917.1_104-S	NM_015781.2	D10Ertd68e;NAP-1	scl0003917.1_104
Cnot7	742.3	881.5	1	1	16.51	scl000572.1_890-S	NM_011135.2	Caf1;Pop2	scl000572.1_890
Gpr108	26	41.2	0.9875	0.9956	16.5449	scl0001738.1_0-S	NM_030084.2	1810015L19Rik	scl0001738.1_0
A930008A22Rik	52	70.3	0.9963	0.9988	16.5714	scl00235283.2_241-S	NM_172768.1	3222402H23;KIAA1201;mKIAA1201	scl00235283.2_241
Ywhah	12	25.2	0.9495	0.9931	16.584	scl0022629.1_0-S	NM_011738.1		scl0022629.1_0
1110058L19Rik	320	408.2	1	1	16.6287	scl16929.3.1_7-S	NM_026503.1		scl16929.3.1_7
2410166I05Rik	39.1	73.3	0.995	0.9988	16.6512	scl23686.4_28-S	NM_029759.2		scl23686.4_28
Ube1c	231.7	306.8	1	1	16.6729	GI_6755920-S	NM_011666.1	AI256736;AI848246;AW546539;UBA3	GI_6755920
1810029G24Rik	38	54.4	0.9944	0.9969	16.6882	scl51843.7.3_62-S	NM_025468.1		scl51843.7.3_62
Cyp7b1	165.2	201.3	1	1	16.7077	scl22366.7.1_2-S	NM_007825.1	hct-1	scl22366.7.1_2
9230105E10Rik	-4.7	7.9	0.1853	0.9152	16.7363	scl00319236.1_170-S	NM_175677		scl00319236.1_170
Aprin	172.4	209.8	1	1	16.7476	scl00100710.2_193-S	NM_175310.3	AS3;mKIAA0979	scl00100710.2_193
Siat4c	46.1	64.1	0.9956	0.9981	16.7727	scl020443.1_125-S	NM_009178.2		scl020443.1_125
Adra2a	187.2	227.2	1	1	16.7768	scl52981.3.767_203-S	NM_007417	[a]2A;[a]>2A<;[a]>2A<-AR;Adra-2;Adra-2a;alpha2-C10;alpha2A	scl52981.3.767_203
Plf2	3.5	20.5	0.7742	0.9869	16.7946	GI_13654299-S	NM_011118.1	MRP-2;PLF-2	GI_13654299
Trp53inp1	67.1	87.9	0.9981	0.9994	16.7953	scl25678.6_114-S	NM_021897.1	2700057G22Rik;SIP;SIP18;SIP27;Stinp;Teap	scl25678.6_114
Prss18	106.6	230.1	0.9994	1	16.7968	scl019144.7_7-S	NM_011177	Bssp;Klk29;Klk6;Klk7;neurosin;Prss9	scl019144.7_7
Kctd9	59.8	83	0.9963	0.9994	16.8176	scl0105440.12_47-S	NM_134073.1		scl0105440.12_47
Dtnbp1	647.1	784.4	1	1	16.8358	scl44037.11.1_29-S	NM_025772.3	5430437B18Rik;dysbindin;sdy	scl44037.11.1_29
Phkg1	51.6	70	0.9963	0.9988	16.846	scl25995.10_72-S	NM_011079.1		scl25995.10_72
Rnf4	203.4	246.5	1	1	16.8797	scl0019822.1_52-S	NM_011278.1		scl0019822.1_52
Tsg101	183.9	240.8	1	1	16.9037	scl022088.2_10-S	NM_021884.1	CC2	scl022088.2_10
Bpnt1	112.3	145.5	0.9994	1	16.9242	scl000932.1_92-S	NM_011794.2	BPntase	scl000932.1_92
Drbp1	130.5	177.8	0.9994	1	16.976	scl0003137.1_53-S	NM_178090.2	Drb1;G430095G15Rik	scl0003137.1_53
Jam2	36.6	52	0.9938	0.9969	16.9786	scl48922.5.43_8-S	NM_023844.2	1110002N23Rik;2410030G21Rik;2410167M24Rik;JAM-2;Jcam2;VE-JAM	scl48922.5.43_8
1110014L17Rik	319	407.5	1	1	17.0362	scl40540.3_48-S	NM_134020.1	AI326346	scl40540.3_48
2310058J06Rik	41.2	60.3	0.995	0.9981	17.07	scl0097064.1_264-S	NM_133784.1	2610021I22Rik;C78399	scl0097064.1_264
Luzp2	165.5	202.2	1	1	17.0829	scl00233271.2_256-S	NM_178705.4	9330154K17Rik;D130073E01	scl00233271.2_256
Rnpep	529.5	635.6	1	1	17.1096	scl16258.13.1_64-S	NM_145417	MGC29229	scl16258.13.1_64
Bach	756.1	1150	1	1	17.1098	scl0002605.1_2-S	NM_133348.1	2410041A17Rik;ACH1;ACT;CTE-II;LACH1	scl0002605.1_2
Eif4a2	1648.8	2162.7	1	1	17.1393	scl0001816.1_0-S	XM_147230.1	4833432N07Rik;BM-010;Ddx2b;Eif4	scl0001816.1_0
Anapc5	87	122.7	0.9988	0.9994	17.1677	scl0004124.1_11-S	NM_021505.1	2510006G12Rik;Anpc5	scl0004124.1_11
Zmpste24	82.4	113.6	0.9988	0.9994	17.1894	scl0230709.2_6-S	NM_172700.1	A530043O15Rik;D030046F19;Face-1	scl0230709.2_6
Chn2	861.2	1084.7	1	1	17.2067	scl0069993.1_33-S	NM_023543.1	1700026N20Rik;ARHGAP3;Bch	scl0069993.1_33
Stard3nl	336	404.9	1	1	17.219	scl44251.7.1_3-S	NM_024270.1	0610035N01Rik;6530409L22Rik;MENTHO	scl44251.7.1_3
Ifi30	41.6	62.6	0.995	0.9981	17.2252	scl000591.1_21-S	NM_023065.2	GILT;IP30	scl000591.1_21
Tmod3	150.7	185	1	1	17.2486	GI_8394459-S	NM_016963.1	U-Tmod;UTMOD	GI_8394459
C130091E20	40.2	59	0.995	0.9981	17.3159	scl0330006.1_306-S			scl0330006.1_306
C030030A07Rik	25.6	73.4	0.9888	0.9994	17.3198	ri|C030030A07|PX00074O12|AK047766|1791-S	AK047766		ri|C030030A07|PX00074O12|AK047766|1791
Mrpl48	243.5	301.7	1	1	17.3227	scl00038.1_12-S	NM_026971.2	1810030E20Rik;2610028L11Rik;CGI-118;D4Ertd786e	scl00038.1_12
Rpl13a	205.7	259.1	1	1	17.3918	gi_32129296_ref_NM_009438.3__526-S	NM_009438.3	1810026N22Rik;Tstap198-7;tum-antigen	gi_32129296_ref_NM_009438.3__526
Tank	141.1	179	0.9994	1	17.4016	scl0003091.1_92-S	NM_011529.1	E430026L09Rik;I-TRAF	scl0003091.1_92
2810432L12Rik	31.9	75.9	0.9925	0.9994	17.4127	scl24337.2_333-S	NM_025944.2	9330170P15Rik	scl24337.2_333
Mfn2	2758.1	3698.6	1	1	17.4152	scl23528.23_0-S	NM_133201.1	D630023P19Rik;Fzo	scl23528.23_0
BC004022	194.8	260.7	1	1	17.4406	scl34521.8.1_20-S	XM_134557.1	MGC7607;N4bp1	scl34521.8.1_20
A230098E07Rik	53.9	72.1	0.9963	0.9988	17.4626	scl24503.4_362-S			scl24503.4_362
Rpl24	3792.7	4514.6	1	1	17.5575	scl068193.4_35-S	NM_024218.2	0610008L05Rik	scl068193.4_35
Tnfrsf12a	191.7	244.4	1	1	17.602	scl50235.5.1_57-S	NM_013749.1	Fn14;HPIP;TWEAK-R;TweakR	scl50235.5.1_57
Pxmp3	257.1	311.4	1	1	17.6246	scl22415.7_11-S	NM_008994.2	35kDa;D3Ertd138e;PEX2;PMP35	scl22415.7_11
Cops5	241.8	297.1	1	1	17.6307	scl000978.1_0-S	NM_013715.1	Jab1;Mov34;Sgn5	scl000978.1_0
Sec22l2	75.4	99.6	0.9981	0.9994	17.6817	scl0001878.1_20-S	NM_133704	1810005C06Rik;SEC22A	scl0001878.1_20
Aldoc	3877.5	4734.1	1	1	17.6962	GI_60687505-S	NM_009657.2	AI847350;Aldo3;AU040929;Scrg2	GI_60687505
C78339	1675	1998.4	1	1	17.7135	scl44819.5_313-S	XM_127312.4		scl44819.5_313
Dnajc12	173.7	216.2	1	1	17.7395	scl38846.4.1_6-S	NM_013888.1	Jdp1;mJDP1	scl38846.4.1_6
AA175286	45.4	63.6	0.9956	0.9981	17.7431	scl29327.6.1_41-S	NM_010156.2	ESTM25	scl29327.6.1_41
BC027127	106	152	0.9994	1	17.747	scl0211739.4_64-S	NM_145967.1	9330184N17Rik;MGC38877	scl0211739.4_64
C530050O22Rik	181.6	272	1	1	17.7691	scl24128.1.6_28-S	NM_172871.1	8030469P05;mKIAA1354	scl24128.1.6_28
Ciapin1	323.3	390.3	1	1	17.7723	scl00109006.2_49-S	NM_134141.2		scl00109006.2_49
Wrn	74.8	117.3	0.9981	0.9994	17.7842	scl0022427.2_165-S	NM_011721.2		scl0022427.2_165
2610001J05Rik	39.3	55.6	0.995	0.9981	17.801	scl29270.2_367-S	NM_183258		scl29270.2_367
2015-09-01	637.3	774	1	1	17.8802	scl0002080.1_55-S	NM_053102.1	15kDa;9430015P09Rik	scl0002080.1_55
Gabra1	128.9	175.6	0.9994	1	17.8869	scl40325.12_575-S	NM_010250.2	Gabra-1	scl40325.12_575
Cycs	1263.1	1515.1	1	1	17.8984	scl013063.3_11-S	NM_007808.2		scl013063.3_11
Txnl4	523.9	633.5	1	1	17.9205	scl027366.4_62-S	NM_025299.1	Dim1;U5-15kD;U5-15kDa	scl027366.4_62
Ralb	102.4	129.7	0.9994	1	17.9588	scl16390.7_3-S	NM_022327.3	5730472O18Rik	scl16390.7_3
Pltp	74.1	102.1	0.9981	0.9994	17.9951	scl0003032.1_86-S	NM_011125.1		scl0003032.1_86
Zcchc12	249.2	322.5	1	1	18.0183	scl54999.4_50-S	NM_028325.1		scl54999.4_50
Mal	254.9	361.2	1	1	18.0187	scl0003126.1_97-S	NM_010762.2	MPV17;VIP17	scl0003126.1_97
Bzw1	309.7	374.9	1	1	18.0699	scl17934.1.1947_17-S	NM_025824	1200015E15Rik;MGC6434;mKIAA0005	scl17934.1.1947_17
Rpp14	394	506.5	1	1	18.0757	scl46641.9_62-S	NM_025938.1	2610511E03Rik	scl46641.9_62
Gabrb2	37.7	62.5	0.9944	0.9981	18.0866	scl41684.10_411-S	NM_008070.2	Gabrb-2	scl41684.10_411
Gabrg2	166.9	205.3	1	1	18.0916	scl0001414.1_316-S	NM_008073.1	Gabrg-2;gamma2	scl0001414.1_316
2600001B17Rik	148.8	200.8	0.9994	1	18.0919	scl0268490.8_24-S	NM_172947.1		scl0268490.8_24
Semcap2	43.6	70.1	0.995	0.9988	18.1183	scl21392.10.1_74-S	NM_016867.1	2200002N01Rik	scl21392.10.1_74
2810021O14Rik	260.9	317.1	1	1	18.1452	scl27876.6.1_53-S	NM_025480.2		scl27876.6.1_53
Ipo9	34.4	112.4	0.9938	0.9994	18.1462	scl00226432.1_235-S	XM_129442.3		scl00226432.1_235
Pgm2	2035.6	2434.2	1	1	18.147	scl25240.12_194-S	NM_028132	2610020G18Rik;Pgm-2;Pgm1	scl25240.12_194
Bmper	39.4	55.9	0.995	0.9981	18.1497	scl37195.16.1_126-S	NM_028472.1	3110056H04Rik;Cv2	scl37195.16.1_126
Hdac1	115.3	166.3	0.9994	1	18.1678	scl015181.3_0-S	NM_008228.1	HD1;RPD3	scl015181.3_0
Rassf4	234.5	313.3	1	1	18.211	scl00213391.1_239-S	NM_178045.3	3830411C14Rik;AD037	scl00213391.1_239
Fbxo3	199.8	263.9	1	1	18.2288	scl0003006.1_310-S	NM_212433.1	1200002G09Rik;1700026K02Rik;Fba	scl0003006.1_310
LOC381418	247.4	312.7	1	1	18.2551	GI_38075640-S	XM_358571.1		GI_38075640
1200015N20Rik	563.7	678.4	1	1	18.2697	scl0071721.2_141-S	NM_024244.3	C030038O19Rik	scl0071721.2_141
Rbm28	407.4	534.8	1	1	18.2746	scl0068272.1_99-S	NM_133925.1		scl0068272.1_99
Commd1	232.9	287.5	1	1	18.2935	scl017846.2_20-S	NM_144514.1	Murr1	scl017846.2_20
Inpp5f	1277.2	1558.9	1	1	18.3026	scl31997.22_366-S	NM_178641.3	5830435P03Rik;AI115354;cI-27;mKIAA0966;SAC2	scl31997.22_366
U2af1-rs2	141.2	175.1	0.9994	1	18.3123	scl0002972.1_431-S	NM_178794.2	35kDa;5031411E02Rik	scl0002972.1_431
Fnta	987.1	1252.2	1	1	18.3485	scl34985.11_48-S	NM_008033.2	FTA	scl34985.11_48
Fgf1	417.5	514.8	1	1	18.3537	scl51485.9_146-S	NM_010197.2	Dffrx;Fam;Fgf-1;Fgfa	scl51485.9_146
	10.5	40.2	0.942	0.9963	18.356	IGKV6-15_Y15976_Ig_kappa_variable_6-15_15-S			IGKV6-15_Y15976_Ig_kappa_variable_6-15_15
Insig2	73.7	215.7	0.9981	1	18.3781	scl000986.1_622-S	NM_133748.1	2900053I11Rik;C730043J18Rik;Insig-2	scl000986.1_622
2610034N24Rik	460.3	555.5	1	1	18.4132	scl32350.23.1_118-S	NM_027256.1	AW493223	scl32350.23.1_118
Copb2	1155.2	1428.6	1	1	18.4367	scl36580.22.1_188-S	NM_015827.1		scl36580.22.1_188
Tes	47.1	65	0.9963	0.9981	18.4847	scl30359.11_166-S	NM_011570	D6Ertd352e;Tes1;Tes2;TESS;testin2	scl30359.11_166
Tm4sf8	1043.9	1263.1	1	1	18.5204	scl0003580.1_5-S	NM_019793.2	1700055K04Rik;TM4-A;Tspan-3	scl0003580.1_5
Car10	373	451.6	1	1	18.5288	scl41039.12.1_215-S	XM_126517.4		scl41039.12.1_215
E030003B04Rik	0.8	16	0.6369	0.9794	18.5526	ri|E030003B04|PX00204A12|AK086820|1328-S	AK086820		ri|E030003B04|PX00204A12|AK086820|1328
LOC230872	33.8	54.7	0.9925	0.9975	18.5778	scl23603.36.1_71-S	NM_172122.1		scl23603.36.1_71
Ptpla	208.3	260.9	1	1	18.5807	scl19661.4.1_12-S	NM_013935.1		scl19661.4.1_12
Cdc42ep2	139	173	0.9994	1	18.5818	scl00104252.2_200-S	NM_026772.1	1110008C05Rik;Borg1;Cep2;D19Bwg1013e	scl00104252.2_200
2310016C16Rik	25	43.6	0.9869	0.9963	18.5867	scl43495.3.1_6-S	NM_027127.1		scl43495.3.1_6
	-1.2	10.9	0.4991	0.9588	18.5909	NeoR-S			NeoR
Ttc1	560.7	685.1	1	1	18.5938	scl0066827.2_11-S	NM_133795.1	4833412C19Rik;TPR1	scl0066827.2_11
C630002N04Rik	78.3	105.7	0.9988	0.9994	18.7021	ri|C630002N04|PX00083E02|AK049839|1398-S	AK049839		ri|C630002N04|PX00083E02|AK049839|1398
Rab6	26.1	61.8	0.9875	0.9981	18.7022	scl00030.1_17-S	BC019118	2610028L11Rik	scl00030.1_17
Ubqln1	68.9	92	0.9981	0.9994	18.7293	scl0003665.1_69-S	NM_152234.1	1110046H03Rik;1810030E05Rik;D13Ertd372e;DA41;Dsk2;Plic-1;XDRP1	scl0003665.1_69
9130020G22Rik	16.3	31.1	0.9726	0.9938	18.7396	ri|C230043B16|PX00174J04|AK082376|1957-S	AK082376		ri|C230043B16|PX00174J04|AK082376|1957
Sri	223.7	273.9	1	1	18.7426	scl0109552.5_10-S	NM_025618.1	2210417O06Rik;Sor	scl0109552.5_10
Rdh11	431	521.7	1	1	18.7493	scl42308.7_397-S	NM_021557	2610319N22Rik;Arsdr1;CGI-82;HCBP12;M42C60;Mdt1;Psdr1;SCALD	scl42308.7_397
E430034L04Rik	461.2	599.8	1	1	18.8851	scl0004136.1_20-S	NM_011816.2	G3BP;G3BP2	scl0004136.1_20
LOC384382	15	35.9	0.9663	0.995	18.9111	GI_38084251-S	XM_357613.1		GI_38084251
Car2	816.5	1079.9	1	1	18.9113	scl0001995.1_3-S	NM_009801.3	CAII;Car-2;Ltw-5;Lvtw-5	scl0001995.1_3
4933428A15Rik	38.7	56	0.995	0.9981	18.9579	scl0071306.2_309-S	NM_027756.1	5430405D20Rik;mKIAA0626	scl0071306.2_309
Ccng1	32.1	52.4	0.9919	0.9969	18.9663	scl0001479.1_77-S	NM_009831.1	Ccng;cyclin G	scl0001479.1_77
9130427A09Rik	13.8	27.5	0.9607	0.9938	19.016	scl51928.9.1_0-S	NM_026240.1	9030613F08Rik;AW061306	scl51928.9.1_0
Lgi1	183.4	232.2	1	1	19.0197	scl53160.8_23-S	NM_020278.2		scl53160.8_23
Sfrp1	53.9	106.5	0.9963	0.9994	19.0781	scl020377.12_22-S	NM_013834.1		scl020377.12_22
C130037N17Rik	91.7	123.8	0.9994	0.9994	19.1118	scl0223332.14_5-S	NM_198024.1		scl0223332.14_5
Ing1l	196.2	269.7	1	1	19.1919	scl34842.3_222-S	NM_023503.2	2810011M06Rik;ING2;P33ING2	scl34842.3_222
1700048E23Rik	387.7	481.2	1	1	19.2007	scl073373.8_41-S	NM_028521.1		scl073373.8_41
Mobp	476.5	578	1	1	19.2585	scl36340.7_459-S	NM_008614		scl36340.7_459
0610007P22Rik	261.7	320.6	1	1	19.3577	scl000093.1_57_REVCOMP-S	NM_026676.1	1110014B11Rik	scl000093.1_57_REVCOMP
Rgs19ip1	36	56.9	0.9938	0.9981	19.3833	scl000630.1_212-S	NM_018771.3	GIPC;Glut1CIP;Semcap1;TaxIP2;TIP-2	scl000630.1_212
Mpv17	243	308.1	1	1	19.5163	scl017527.1_149-S	NM_008622.1	Tg.Mpv17	scl017527.1_149
Eif1ay	214.9	272.8	1	1	19.5951	scl54514.7_209-S	NM_025437	1500010B24Rik	scl54514.7_209
2810013M15Rik	82	109.5	0.9988	0.9994	19.5953	scl41280.17_8-S	NM_026197.1	2610100D03Rik	scl41280.17_8
Vim	360.5	439.8	1	1	19.6573	GI_32189314-S	NM_011701.3	MGC102095	GI_32189314
Ppid	537.9	703.3	1	1	19.7185	scl067738.10_4-S	NM_026352.2	4930564J03Rik;CYP-40	scl067738.10_4
1200006F02Rik	190.6	236	1	1	19.7426	scl25758.6.1_14-S	NM_027872.1		scl25758.6.1_14
Spon2	7.5	20.9	0.8971	0.9875	19.7752	scl26719.6_100-S	NM_133903.2	2310045I24Rik;AI504350;M-spondin;Mindin	scl26719.6_100
1110060F11Rik	419	510.7	1	1	19.835	scl0002748.1_8-S	NM_026395.1	5830454N22Rik	scl0002748.1_8
D6Wsu176e	109.4	139.5	0.9994	1	19.8451	scl29247.11.6_29-S	NM_138587.3		scl29247.11.6_29
Sncg	232.9	287	1	1	19.8936	scl45723.1.148_13-S	NM_011430.1	persyn	scl45723.1.148_13
Cai	138.4	175.8	0.9994	1	19.9381	scl29051.11.1_27-S	NM_009787.1	Erp72	scl29051.11.1_27
Slc35a5	49.4	81.3	0.9963	0.9994	19.9399	scl0074102.2_20-S	NM_028756.2	1010001J06Rik;D16Ertd450e	scl0074102.2_20
Naca	312.8	389.5	1	1	20.0115	scl0017938.1_31-S	NM_013608.2	mKIAA0363;skNAC	scl0017938.1_31
Noc4	137.7	173.2	0.9994	1	20.0363	scl0018117.1_185-S	NM_010926.1		scl0018117.1_185
Tdrkh	146.7	185.6	0.9994	1	20.0705	scl072634.6_30-S	XM_131021.5		scl072634.6_30
Siat10	159.6	208.9	1	1	20.1293	scl0054613.2_126-S	NM_018784.1	1700023B24Rik;St3galVI	scl0054613.2_126
Nfil3	298.6	416.2	1	1	20.1308	scl43966.3_250-S	NM_017373.2	E4BP4	scl43966.3_250
Dld	923.2	1165.7	1	1	20.1382	scl0002332.1_7-S	NM_007861		scl0002332.1_7
Dtna	143.8	212	0.9994	1	20.1445	scl013527.8_0-S	NM_207650.1	A0;adbn;Dtn	scl013527.8_0
Cops4	37.5	55.3	0.9944	0.9969	20.1464	scl27538.6.1001_4-S	NM_012001.1	D5Ertd774e	scl27538.6.1001_4
Lman2l	22.8	41.5	0.9863	0.9963	20.1841	scl00214895.1_160-S	XM_129848.4		scl00214895.1_160
Cntn2	561.5	776.6	1	1	20.2246	scl0021367.1_277-S	XM_358332.1		scl0021367.1_277
E230022H04Rik	197.6	245.3	1	1	20.3237	scl00225339.2_67-S	NM_153515.2	5430429D03Rik;MGC32132	scl00225339.2_67
2310016C16Rik	61.5	101.9	0.9963	0.9994	20.3523	scl0003638.1_65-S	NM_027127.1		scl0003638.1_65
H2-L	162.9	225.1	1	1	20.3541	scl0014980.1_39-S			scl0014980.1_39
2300009N04Rik	82.3	138.5	0.9988	1	20.374	scl069477.2_5-S			scl069477.2_5
H47	399.2	539	1	1	20.4128	scl00026.1_111-S	NM_024439.2	1500011E07Rik;H-4;H-47;H4	scl00026.1_111
Gdi3	415.4	1429	1	1	20.4462	scl014569.11_60-S	NM_008112.2	GDI-B;GDIB	scl014569.11_60
4930432O21Rik	293.2	360.8	1	1	20.4655	GI_38081808-S	XM_128440.2		GI_38081808
Dazap2	172.7	216.2	1	1	20.5033	scl023994.4_204-S	NM_011873.2	Brbp;gt6-12;MGC25222;mKIAA0058;Prtb	scl023994.4_204
Sfrs3	163.4	204.5	1	1	20.5078	scl0020383.1_163-S	NM_013663.3	X16	scl0020383.1_163
Fahd1	168.3	214	1	1	20.538	scl50197.1.198_198-S	NM_023480.1		scl50197.1.198_198
3830432E14Rik	16.4	32.1	0.9744	0.9944	20.6606	ri|3830432E14|PX00007H02|AK028396|2114-S	AK028396		ri|3830432E14|PX00007H02|AK028396|2114
Skb1	34.9	58.9	0.9925	0.9981	20.6806	scl000320.1_35-S	NM_013768.1	Jbp1	scl000320.1_35
Sfrs2	1158.5	1409	1	1	20.6972	scl020382.2_66-S	NM_011358.1	D11Wsu175e;MRF-1;Pr264;SC35;Sfrs10	scl020382.2_66
Fkbp4	1532.7	1888.4	1	1	20.7276	scl0014228.2_173-S	NM_010219.2	59kDa;FKBP-52;FKPB52;p59	scl0014228.2_173
B3galt6	52.7	146.5	0.9963	1	20.7371	scl00117592.2_262-S	NM_080445.2	GalTII	scl00117592.2_262
AU021838	70.6	94	0.9981	0.9994	20.7372	GI_85702277-S	NM_001037746.1	6720461H18;AW536152;MGC117905;Prps1	GI_85702277
Ccdc9	352.6	433.3	1	1	20.7374	scl0243846.1_330-S	NM_172297.1	2600011L02Rik	scl0243846.1_330
C130086A10	203.4	265.9	1	1	20.7594	scl25663.5_353-S	NM_173746.2		scl25663.5_353
1110033J19Rik	108.8	144.9	0.9994	1	20.7649	scl066184.1_108-S	NM_025405.1		scl066184.1_108
Gmds	198.5	271	1	1	20.7835	scl44126.11.1_57-S	NM_146041.1	MGC18773	scl44126.11.1_57
Khdrbs1	130.7	192.9	0.9994	1	20.851	scl020218.6_1-S	NM_011317.2	p62;Sam68	scl020218.6_1
LOC381820	171.2	259.7	1	1	20.9116	GI_38085360-S	XM_355822.1		GI_38085360
Kcnab1	387	475.4	1	1	20.9231	scl23131.18_205-S	NM_010597.2	Akr8a8;mKv(beta)1	scl23131.18_205
Sfrs16	88.3	261	0.9994	1	20.9464	scl31678.22.1_32-S	NM_016680	Clasp;Swap2	scl31678.22.1_32
Ppp1cb	97.7	139.1	0.9994	1	21.0308	scl0004044.1_9-S	NM_172707.1	1200010B19	scl0004044.1_9
Cklfsf5	592.8	818.1	1	1	21.1026	scl46294.4.1_0-S	NM_026066.1	1500005P16Rik;2900052H21Rik	scl46294.4.1_0
Rnf4	69.8	97.4	0.9981	0.9994	21.1269	scl019822.7_223-S	NM_011278.1		scl019822.7_223
1700034H14Rik	94.4	125.8	0.9994	0.9994	21.1728	scl067105.6_6-S	NM_025969.1	2700002I20Rik	scl067105.6_6
Idh3g	600.2	812.4	1	1	21.2513	scl54154.5.1_20-S	NM_008323.1		scl54154.5.1_20
Dars	208	297.4	1	1	21.3148	scl16334.7.1_2-S	NM_145507.1	5730439G15Rik	scl16334.7.1_2
Clgn	12.9	37.7	0.957	0.9956	21.3847	scl0012745.2_138-S	NM_009904.1	4930459O04Rik;Cln	scl0012745.2_138
Plrg1	495.4	789.5	1	1	21.4264	scl23055.15.1_74-S	NM_016784.2		scl23055.15.1_74
Tceal1	79	105	0.9988	0.9994	21.4319	scl54611.2_16-S	NM_146236.1	MGC18752;P21;pp21;SIIR	scl54611.2_16
Bloc1s2	298.5	394.4	1	1	21.4504	scl52449.4.351_12-S	XM_193940.2		scl52449.4.351_12
Atp6v0d1	802.1	1102	1	1	21.5338	scl000737.1_18-S	NM_013477.2	Ac39;Atp6d;P39;VATX;Vma6	scl000737.1_18
Mkrn3	21.4	40.4	0.9832	0.9956	21.5754	scl31260.1.18_287-S	NM_011746.1	D7H15S9-1;Zfp127	scl31260.1.18_287
G3bp	40.7	61.4	0.995	0.9981	21.6553	scl0001574.1_5-S	NM_013716.1		scl0001574.1_5
Vamp4	260.6	324	1	1	21.7014	scl000897.1_256-S	AF061516	D1Ertd147e	scl000897.1_256
Lhfpl2	177.5	223.3	1	1	21.7116	scl44517.9_405-S	NM_172589.1	6030465B15;mKIAA0206	scl44517.9_405
Dcn	294.6	384.6	1	1	21.7501	scl0013179.1_275-S	NM_007833.1	DC;DSPG2;PG40;PGII;PGS2;SLRR1B	scl0013179.1_275
Frag1	10.8	46.8	0.9389	0.9969	21.8244	scl000187.1_133-S	NM_145583.1		scl000187.1_133
Gnpda2	68.4	92.3	0.9981	0.9994	21.8624	scl0067980.2_203-S	NM_027681.1	4921523I18Rik;4933412A11Rik;Gnp2;GNPDA;Sb52	scl0067980.2_203
D10Ertd322e	381.3	500.5	1	1	21.8854	scl067270.3_15-S	NM_026065.2		scl067270.3_15
Zfp191	28	48.5	0.99	0.9969	21.9154	scl0059057.1_625-S	NM_021559.1	3526401F17Rik;5033419P20Rik;KOX17;ZF-12;Znf191	scl0059057.1_625
Sh3gl2	393.5	502.6	1	1	21.9439	scl020404.8_19-S	NM_019535.2	9530001L19Rik;EEN-B1;Sh3d2a;SH3PA	scl020404.8_19
BC023823	53	105.4	0.9963	0.9994	21.9813	scl24984.5.1_10-S	NM_153566.1	MGC38336	scl24984.5.1_10
Chst10	149.8	190.2	1	1	22.1094	scl16831.9_428-S	NM_145142.1	AI507003;Hnk-1st;ST	scl16831.9_428
Cd200	288.8	430.7	1	1	22.1377	GI_31543262-S	NM_010818.2	Mox2;OX2	GI_31543262
LOC382058	18.5	35.2	0.9782	0.995	22.177	GI_38089675-S	XM_356133.1		GI_38089675
Igsf1	375.1	526	1	1	22.1906	scl0002884.1_251-S	NM_183336.1	5330413N23;5530402E03;InhBP/p120	scl0002884.1_251
Dbi	5401.7	6607.9	1	1	22.2237	scl16375.7_22-S	NM_007830.2	ACBD1;Acbp	scl16375.7_22
Psma4	597.9	766.9	1	1	22.233	scl026441.8_13-S	NM_011966	C9	scl026441.8_13
Eps8	50.5	71.4	0.9963	0.9988	22.251	scl28264.25.1_26-S	NM_007945.1		scl28264.25.1_26
Snx14	35.9	61.5	0.9931	0.9981	22.3193	scl0003410.1_9-S	NM_172926.1	B830022K16;C330035N22Rik;YR-14	scl0003410.1_9
Rab8a	76	104.7	0.9981	0.9994	22.3352	scl0017274.1_278-S	NM_023126.2	Mel	scl0017274.1_278
Clk4	67.6	91.6	0.9981	0.9994	22.376	scl0001372.1_16-S	NM_007714.2		scl0001372.1_16
X83328	222.2	278.6	1	1	22.4136	scl013929.8_8-S	NM_025275.2	ESTM12	scl013929.8_8
Asah2	121.4	156.3	0.9994	1	22.4265	scl52553.25_587-S	NM_018830.1		scl52553.25_587
Epb4.1l3	66.8	90.8	0.9981	0.9994	22.4335	scl0001634.1_45-S	NM_013813.1	4.1B;Dal1;NBL3	scl0001634.1_45
Rgl1	89.4	319.8	0.9994	1	22.4665	scl019731.1_197-S	NM_016846.2	Rgl	scl019731.1_197
Pcyt2	207.6	261	1	1	22.4805	scl0001280.1_1-S	NM_024229.2	1110033E03Rik;ET	scl0001280.1_1
Abcd3	86	115.6	0.9988	0.9994	22.5391	scl0019299.2_231-S	NM_008991.1	PMP68;PMP70;Pxmp1	scl0019299.2_231
Mest	54.1	75.8	0.9963	0.9994	22.5615	scl0017294.1_5-S	NM_008590.1	Peg1	scl0017294.1_5
A730098D12Rik	438.4	604.7	1	1	22.5908	scl0231386.4_56-S	NM_177680.2		scl0231386.4_56
Nck2	281.7	354.9	1	1	22.6288	scl017974.6_299-S	NM_010879.2	Grb4;NCKbeta	scl017974.6_299
Kcnj16	181.2	230.1	1	1	22.6327	scl40763.6_142-S	NM_010604.2	6430410F18Rik;Kir5.1	scl40763.6_142
Snx2	101.7	147.3	0.9994	1	22.6614	scl51947.8_27-S	NM_026386	0610030A03Rik	scl51947.8_27
Sfrs7	133.2	189.5	0.9994	1	22.6755	scl49587.9_193-S	NM_146083.1	35kDa;9430065L19Rik;9G8;MGC38287;NX-96	scl49587.9_193
Gadd45g	176.8	239.6	1	1	22.6974	scl44772.3.1_6-S	NM_011817.1	CR6;DDIT2;OIG37	scl44772.3.1_6
C920027J16Rik	6.9	26.3	0.8883	0.9938	22.7012	ri|C920027J16|PX00178P08|AK050643|1784-S	AK050643		ri|C920027J16|PX00178P08|AK050643|1784
1200006O19Rik	38.1	62.8	0.9944	0.9981	22.7072	scl0002371.1_10-S	NM_026164.1	Ipla2(gamma)	scl0002371.1_10
1700025G04Rik	122.7	158.2	0.9994	1	22.7624	scl16161.8_304-S	NM_197990.1		scl16161.8_304
2610035D17Rik	159	202.7	1	1	22.8877	scl39368.13_542-S			scl39368.13_542
Etohd2	29.3	76.2	0.9919	0.9994	22.9227	scl013996.2_4-S			scl013996.2_4
C78212	184.1	252	1	1	22.9519	scl0380601.1_239-S	NM_198176.1	MGC60835	scl0380601.1_239
Cct4	1306.5	1676.9	1	1	22.9892	scl012464.14_38-S	NM_009837.1	A45;Cctd	scl012464.14_38
Cope	1047.1	1291.1	1	1	23.0102	scl059042.7_5-S	NM_021538.1	1110005D17Rik;Cope1	scl059042.7_5
Brms1l	590.9	732	1	1	23.1635	scl43194.12_66-S	NM_027867.2	0710008O11Rik;D12Ertd407e	scl43194.12_66
2410015B03Rik	70.1	95.2	0.9981	0.9994	23.1687	scl52082.9.1_8-S	NM_028036.2		scl52082.9.1_8
Gad1	1530.3	1970.2	1	1	23.2145	scl0003045.1_120-S	NM_008077.2	EP10;Gad-1;GAD67	scl0003045.1_120
2610029D06Rik	120.1	165.3	0.9994	1	23.3643	scl47811.2_529-S	NM_030199.2		scl47811.2_529
Klhdc2	71.6	120.9	0.9981	0.9994	23.3732	scl43155.10.40_7-S	NM_027117.1	2310022K15Rik;D12Ertd522e;HCLP-1;LCP	scl43155.10.40_7
3300001P08Rik	540.8	688.7	1	1	23.3874	scl0067684.1_211-S	NM_026313.1	Luc7a	scl0067684.1_211
4930481A15Rik	0.5	16.8	0.6182	0.9825	23.4583	scl074931.4_20-S	XM_148889.4		scl074931.4_20
2610103J23Rik	82.8	110.8	0.9988	0.9994	23.4597	scl0067154.2_142-S	NM_026002.3	D8Bwg1112e;Lyric	scl0067154.2_142
2610319K07Rik	544	695.4	1	1	23.5174	scl25655.8_229-S	NM_028264.2		scl25655.8_229
Ppm1b	42.3	79.1	0.995	0.9994	23.6305	scl0019043.1_76-S	NM_011151.1	PP2CB	scl0019043.1_76
C530015M04Rik	491.7	617.7	1	1	23.6888	ri|C530015M04|PX00317G24|AK082943|3872-S	AK082943		ri|C530015M04|PX00317G24|AK082943|3872
AI256775	116.9	165.5	0.9994	1	23.8252	scl00218341.2_26-S	NM_178916.2	D030068K09	scl00218341.2_26
5031439A09Rik	93.2	147.1	0.9994	1	23.8353	scl0068151.2_330-S	NM_026582.2		scl0068151.2_330
1110015E22Rik	32.4	146.4	0.9925	1	23.8605	scl32054.9.1_17-S	NM_024228.1		scl32054.9.1_17
Qdpr	1798.2	2223.6	1	1	23.8709	scl0110391.1_29-S	NM_024236.1	2610008L04Rik;D5Ertd371e;Dhpr;PKU2	scl0110391.1_29
Dnajb11	347.7	435.5	1	1	23.9015	scl49316.10.1_12-S	XM_148071.1	1810031F23Rik;ABBP-2;AL024055;Dj9	scl49316.10.1_12
0610033H09Rik	713.6	886.3	1	1	23.9086	scl24605.2.1_63-S	NM_025338.1	AIP	scl24605.2.1_63
AU067744	1611.9	2038.1	1	1	23.9089	scl00214505.2_7-S	NM_172529.1	6430527N14Rik;A830081F19;Mdcp1	scl00214505.2_7
Grsf1	392.3	492.5	1	1	23.9189	scl26406.12_265-S	NM_178700.2	B130010H02;D5Wsu31e	scl26406.12_265
Plvap	196.9	265.1	1	1	24.0117	scl34674.6.1_40-S	NM_032398.1	MECA32;PV-1	scl34674.6.1_40
Comp	26.1	59.7	0.9888	0.9981	24.0494	scl33728.21.1_0-S	NM_016685		scl33728.21.1_0
Timp4	235	324.8	1	1	24.0554	scl28526.3_1-S	NM_080639.2	TIMP-4	scl28526.3_1
2400009B08Rik	85.6	114.7	0.9988	0.9994	24.0604	scl35154.1.15_20-S	XM_358687.1		scl35154.1.15_20
Map3k6	13.3	42.2	0.9551	0.9956	24.0927	scl24866.28.1_30-S	NM_016693	MAPKKK6	scl24866.28.1_30
Pum2	158.8	214.8	1	1	24.209	scl0080913.2_173-S	NM_030723.1	5730503J23Rik;mKIAA0235;Pumm2	scl0080913.2_173
Enpp6	133.9	192.3	0.9994	1	24.2168	scl00320981.2_269-S	NM_177304.2	B830047L21Rik;D8Ertd514e	scl00320981.2_269
Rhobtb3	321.9	409.4	1	1	24.2616	scl0073296.1_60-S	NM_028493.1	1700040C17Rik;2610033K01Rik;4930503C18Rik;mKIAA0878	scl0073296.1_60
2610029G23Rik	178.4	229	1	1	24.3168	scl0002929.1_32-S	NM_026312.2		scl0002929.1_32
Cnn3	1033.7	1284.2	1	1	24.3484	scl071994.3_187-S	NM_028044.1	1600014M03Rik	scl071994.3_187
Ddx47	144.3	186.6	0.9994	1	24.4049	scl29434.9.1_30-S	NM_026360.1	4930588A18Rik	scl29434.9.1_30
Shh	56.2	79.5	0.9963	0.9994	24.4082	scl26765.3_186-S	NM_009170.2	9530036O11Rik;Dsh;Hhg1	scl26765.3_186
Sdcbp	589.2	787.2	1	1	24.5007	scl0053378.2_54-S	NM_016807.1	Sycl	scl0053378.2_54
Rabl4	296	380.9	1	1	24.6395	scl46995.11.1_59-S	NM_025931.2	2600013G09Rik	scl46995.11.1_59
Tax1bp1	346.5	474	1	1	24.6898	scl30036.21_295-S	NM_025816.1	1200003J11Rik;D6Ertd404e;D6Ertd772e;T6bp;TXBP151	scl30036.21_295
Zfp289	18.9	41.3	0.9782	0.9956	24.7277	scl0003113.1_49-S	NM_023854	2310032E02Rik	scl0003113.1_49
MGC67181	18.5	51.7	0.98	0.9969	24.7383	scl00242747.1_237-S	NM_198619.1		scl00242747.1_237
Adh5	82.2	111.9	0.9988	0.9994	24.7545	scl22543.4.4_13-S	NM_007410.2	Adh-5;Adh3;GSNOR	scl22543.4.4_13
2610528B01Rik	110.1	174.8	0.9994	1	24.815	scl24815.1.459_5-S			scl24815.1.459_5
Farslb	842	1050.2	1	1	24.883	scl16583.17.10_2-S	NM_011811.2	Farsa;Farsl;Frsb	scl16583.17.10_2
Sfrs1	548.5	694.9	1	1	24.9442	scl0110809.8_13-S	NM_173374.2	1110054N12Rik;6330415C05Rik	scl0110809.8_13
2410004N11Rik	242	309.2	1	1	25.0013	scl0066989.1_296-S	NM_025888.2	D17Ertd562e	scl0066989.1_296
D3Jfr1	52	102	0.9963	0.9994	25.0074	scl0002095.1_21-S	NM_144901.2	MGC19174;mKIAA0885;unr	scl0002095.1_21
Dtna	130.9	181.3	0.9994	1	25.1234	scl0002207.1_183-S	NM_010087.2	A0;adbn;Dtn	scl0002207.1_183
1810011E08Rik	965	1204.3	1	1	25.1305	scl34807.5_39-S			scl34807.5_39
A130065C13Rik	-0.2	14.7	0.5733	0.9794	25.1513	ri|A130065C13|PX00124A20|AK037935|681-S	AK037935		ri|A130065C13|PX00124A20|AK037935|681
Dusp1	681.2	1002.7	1	1	25.1818	scl50147.4_283-S	NM_013642.1	3CH134;erp;mkp-1;Ptpn16	scl50147.4_283
2810405I11Rik	241.4	310.2	1	1	25.3421	scl0067064.2_260-S	NM_024190.1		scl0067064.2_260
Cryzl1	535.6	684.9	1	1	25.3598	scl0001778.1_28-S	NM_133679.1	2210407J23Rik;2410006O11Rik	scl0001778.1_28
Marcks	536.3	674.6	1	1	25.7733	scl017118.3_6-S	NM_008538	Macs;PKCSL	scl017118.3_6
Cryab	1282.8	1754.2	1	1	25.8488	scl36966.5.1_28-S	NM_009964.1	Crya-2;Crya2	scl36966.5.1_28
LOC333744	91.7	136.6	0.9994	1	25.9142	GI_38083108-S	XM_289803.2		GI_38083108
BC051080	409	559.8	1	1	26.0682	scl0237422.9_211-S	NM_183172.1		scl0237422.9_211
Nts	66.4	104.5	0.9975	0.9994	26.0888	scl0003764.1_13-S	NM_024435.2	5033428E16Rik;NMN-125;NN;NT;NT/N;NTS1	scl0003764.1_13
Strap	409.6	528.6	1	1	26.2109	scl29414.11.4_112-S	NM_011499.1		scl29414.11.4_112
Abcf2	219.1	287.2	1	1	26.3777	scl027407.6_4-S	NM_013853.1	0710005O05Rik;D13Ertd614e;E430001O06	scl027407.6_4
Vps26	501.3	633.2	1	1	26.4142	scl37899.10_160-S	NM_133672	HB58	scl37899.10_160
C80879	98.9	135.3	0.9994	1	26.5803	scl026374.8_4-S	NM_011931.1	Cop1	scl026374.8_4
Pmp22	153.5	200.3	1	1	26.6603	scl018858.5_31-S	NM_008885.1	22kDa;Gas-3;HNPP;Tr;trembler	scl018858.5_31
Sypl	423.2	556.5	1	1	26.6841	scl0019027.2_109-S	NM_013635.2	D12Ertd446e;Pan I;Pphn	scl0019027.2_109
1190005P17Rik	33.1	53.3	0.9925	0.9969	26.7307	scl0066225.1_2-S	NM_025431.2		scl0066225.1_2
Mrpl30	347.7	472.8	1	1	26.7496	scl0107734.5_7-S	NM_027098.1	2310001L22Rik;MRP-L28;Rpml28	scl0107734.5_7
LOC384607	37.8	60.7	0.9944	0.9981	26.7528	GI_38086640-S	XM_357740.1		GI_38086640
Rpa3	82.5	115.2	0.9988	0.9994	26.959	scl068240.2_29-S	NM_026632.1	14kDa;C330026P08Rik	scl068240.2_29
Sv2a	1547.6	2149.5	1	1	27.0331	scl064051.13_189-S	NM_022030.2		scl064051.13_189
Gpr22	200	271.6	1	1	27.1067	scl42555.3_391-S	NM_175191.2	2900068K05Rik	scl42555.3_391
Rpl7	1392.3	1755	1	1	27.3631	scl019989.6_6-S	NM_011291	Rpl7a;Surf-3	scl019989.6_6
Sfrs3	143.4	188.6	0.9994	1	27.3981	scl50907.6_346-S	NM_013663.3	X16	scl50907.6_346
C130019F04Rik	6.6	26.7	0.8796	0.9938	27.6397	ri|C130019F04|PX00167A04|AK081462|2899-S	AK081462		ri|C130019F04|PX00167A04|AK081462|2899
1810035L17Rik	385.1	520.5	1	1	27.7483	scl00380773.1_71-S	XM_354684.1		scl00380773.1_71
Orc5l	84.3	115.9	0.9988	0.9994	27.8366	scl0004120.1_356-S	NM_011959.1	MmORC5;Orc5	scl0004120.1_356
Zfp101	45	68.2	0.9956	0.9981	28.0915	scl0022643.1_281-S	NM_009542.1		scl0022643.1_281
Rap2c	209.4	281	1	1	28.1318	scl54266.5_48-S	NM_172413.1	2010200P20Rik	scl54266.5_48
Rbm8	72.4	141.7	0.9981	1	28.2582	scl0060365.1_251-S	NM_025875.1	2310057C03Rik	scl0060365.1_251
F830009M01Rik	-2.4	14.2	0.3943	0.9763	28.4068	ri|F830009M01|PL00016F22|AK089706|1039-S	AK089706		ri|F830009M01|PL00016F22|AK089706|1039
Rwdd2	185.3	242.6	1	1	28.7569	scl36646.3.1_24-S	NM_027100	1700030C20Rik	scl36646.3.1_24
AB041568	19.8	46.7	0.9832	0.9969	28.8307	ri|F830033L24|PL00007A19|AK089856|4767-S	AK089856		ri|F830033L24|PL00007A19|AK089856|4767
H2afy	418	536.1	1	1	28.8465	scl43914.11.4_21-S	NM_012015.1	H2AF12M;macroH2A1;mH2a1	scl43914.11.4_21
1110035L05Rik	110.4	149.7	0.9994	1	28.8479	scl24602.8.5_0-S	NM_026125.1		scl24602.8.5_0
Sc4mol	761.8	971.2	1	1	28.9385	scl34758.8_55-S	NM_025436.1	1500001G16Rik;DESP4;ERG25	scl34758.8_55
Slco1c1	241	340	1	1	29.1294	scl29390.15.1_23-S	NM_021471.1	OATP-F;Oatp2;Slc21a14	scl29390.15.1_23
Cldn11	3432.3	4696.3	1	1	29.3394	scl23301.3_380-S	NM_008770.1	Claudin-11;Claudin11;Osp;Otm	scl23301.3_380
Hbb-b1	1972.1	8048	1	1	29.3809	ri|2510040I07|ZX00060E20|AK011067|627-S	AK011067		ri|2510040I07|ZX00060E20|AK011067|627
Pes1	120.3	162	0.9994	1	29.4654	scl0064934.1_269-S	NM_022889.2		scl0064934.1_269
Drbp1	48.6	81.1	0.9963	0.9994	29.6539	GI_23510272-A	NM_153405.1	Drb1;G430095G15Rik	GI_23510272
Bcas1	3598.9	4610.7	1	1	29.6552	scl0076960.2_269-S	NM_029815.1	2210416M21Rik;9030223A09Rik;NABC1	scl0076960.2_269
Gja1	2688	3428.9	1	1	30.1177	scl38917.7_7-S	NM_010288.2	Cnx43;connexin43;Cx43;Cx43alpha1;Gja-1	scl38917.7_7
Tigd2	107.9	148.9	0.9994	1	30.2693	scl29979.4_457-S	XM_144820.3		scl29979.4_457
Araf	568.9	732.3	1	1	30.3757	ri|1200013E08|R000009G20|AK004741|2846-S	AK004741	1200013E08Rik;A-Raf	ri|1200013E08|R000009G20|AK004741|2846
Dscr1l2	17.8	37.1	0.9769	0.9956	30.6402	scl053902.1_215-S	NM_022980.2		scl053902.1_215
Cul4b	149.6	201.8	1	1	30.9289	scl072584.1_264-S	NM_028288.3	2700050M05Rik	scl072584.1_264
Hnrph1	570.2	736.1	1	1	30.9502	scl0059013.2_121-S	NM_021510.1	E430005G16Rik;Hnrnph	scl0059013.2_121
Gprc5b	1573.7	2129.2	1	1	31.1151	scl30749.5_442-S	NM_022420.1	Raig2	scl30749.5_442
Itm2a	465	621.3	1	1	31.2147	scl0002945.1_58-S	NM_008409.1	E25;Itm2	scl0002945.1_58
Rohn	435.4	565.9	1	1	31.5972	scl011858.3_21-S	NM_009708.1	Arhn	scl011858.3_21
Ssa2	265.4	349.1	1	1	31.9727	scl16191.8_301-S	NM_013835.1	SS-A/Ro;Ssa	scl16191.8_301
Fts	15.6	40.8	0.9707	0.9956	32.0824	scl000558.1_11-S	BC008130	Fif;Ft;Ft1	scl000558.1_11
1110030J09Rik	71.5	103.3	0.9981	0.9994	32.365	scl41340.2.1_55-S	NM_025397.2		scl41340.2.1_55
Fbxo44	390.6	559.2	1	1	32.9232	scl23522.8_437-S	NM_173401.1		scl23522.8_437
Rab6	348	457.2	1	1	32.9964	scl32311.12_300-S	NM_024287.2	2610028L11Rik	scl32311.12_300
sty	175.1	273.1	1	1	33.2254	scl000989.1_15-S	U21209		scl000989.1_15
Abhd3	330.4	472.5	1	1	33.2488	scl51657.9.1_30-S	NM_134130.1	AA675331;LABH3	scl51657.9.1_30
Mog	429.4	606	1	1	33.2702	scl0001753.1_34-S	NM_010814.1		scl0001753.1_34
Cugbp1	76.9	110.7	0.9981	0.9994	33.3796	scl0013046.1_235-S	NM_198683.1	Brunol2;CUG-BP;CUGBP;D2Wsu101e;HNAB50;NAB50	scl0013046.1_235
LOC209405	41.1	72.8	0.995	0.9994	33.6864	GI_38093939-S	XM_142315.2		GI_38093939
Ube2g1	264	365	1	1	34.0284	scl0067128.1_219-S	NM_025985.2	2700059C12Rik;AI256795;AU014992;D130023C12Rik	scl0067128.1_219
Fos	63	165.7	0.9969	1	34.2303	scl42959.4_58-S	NM_010234.2	c-fos;D12Rfj1	scl42959.4_58
Rps3	1747.1	2276.7	1	1	34.4131	scl027050.3_42-S	NM_012052.1	Rs_3	scl027050.3_42
Nap1l5	148.7	207	1	1	34.6836	scl28956.1_12-S	NM_021432.1	1110020M21Rik	scl28956.1_12
Chordc1	652.3	857	1	1	34.9184	scl066917.11_233-S	NM_025844.1	1110001O09Rik;Chp-1	scl066917.11_233
Mbnl1	733	963.3	1	1	35.2138	scl23145.17_313-S	NM_020007.2	Mbnl;mKIAA0428	scl23145.17_313
Kctd12	91.9	134	0.9994	1	35.3321	scl00239217.2_149-S	NM_177715.2	6430514H16	scl00239217.2_149
0610012D09Rik	129.2	179	0.9994	1	35.644	scl32110.5.1_11-S	NM_021554.2	Drev;MNCb-5680	scl32110.5.1_11
LOC384414	11.5	39.7	0.947	0.9956	35.783	IGKV6-23_AJ235961_Ig_kappa_variable_6-23_15-S	XM_357632.1		IGKV6-23_AJ235961_Ig_kappa_variable_6-23_15
Ebna1bp2	84.8	128.9	0.9988	1	35.9032	scl0078543.1_127-S	NM_026932.2	1810014B19Rik;Ebp2;Nobp;p40	scl0078543.1_127
Ednrb	871.3	1154.4	1	1	36.4576	scl45193.8_18-S	NM_007904.2	ET-B;ET>B<;ETb;s	scl45193.8_18
LOC229810	15.3	65	0.9701	0.9981	36.6974	GI_38077071-S	XM_124173.2		GI_38077071
Clic4	402.6	638.5	1	1	36.7324	scl029876.1_59-S	XM_124389.1	mc3s5;mtCLIC	scl029876.1_59
Fbxo30	48.1	77.5	0.9963	0.9994	36.8723	scl39152.4_674-S	XM_125493		scl39152.4_674
6720407G21Rik	33.3	105.4	0.9925	0.9994	37.1887	scl0077733.1_129-S	XM_133272		scl0077733.1_129
Lpl	234.3	337.8	1	1	37.6484	scl0016956.1_234-S	NM_008509.1		scl0016956.1_234
2810055E05Rik	133.7	186.8	0.9994	1	37.6795	scl0002795.1_13-S	NM_153160.2	HSPC251;LDC4;pNO40;pS1D	scl0002795.1_13
1110049F12Rik	1086.7	1477.9	1	1	37.7819	scl066193.1_138-S	NM_025411.2	Trp26	scl066193.1_138
Ppp1r3c	1053	1399.6	1	1	38.0683	scl52526.2_193-S	NM_016854.1	Ppp1r5;PTG	scl52526.2_193
Rab6	464.3	1192.7	1	1	38.3302	scl00072.1_32-S	NM_024287.2	2610028L11Rik	scl00072.1_32
E130203B14Rik	57.6	90	0.9963	0.9994	39.4624	scl46470.8.1_0-S	NM_178791.2		scl46470.8.1_0
Atp2c1	43.1	71.8	0.995	0.9988	39.5442	scl0235574.1_14-S	NM_175025.2	1700121J11Rik;ATP2C1A;BCPM;D930003G21Rik;HHD;MGC58010;pmr1;SPCA	scl0235574.1_14
Nsbp1	47.8	81.8	0.9963	0.9994	39.5883	scl53904.6_21-S	NM_016710.1	GARP45;NBP-45	scl53904.6_21
Farsla	49.2	85.9	0.9963	0.9994	40.2734	scl0066590.2_213-S	NM_025648.1	0610012A19Rik	scl0066590.2_213
Riok3	177.3	252.2	1	1	40.3633	scl066878.10_113-S	NM_024182.2	1200013N13Rik;Sudd	scl066878.10_113
Rdx	67.9	120.7	0.9981	0.9994	40.9143	scl019684.7_10-S	NM_009041		scl019684.7_10
Tpm3	60	94.7	0.9963	0.9994	41.0642	scl0001950.1_6-S	NM_022314	gamma-TM;hTM30nm;hTMnm;Tpm-5;Tpm5;Trop-5	scl0001950.1_6
BC027344	4.5	27.3	0.816	0.9938	41.1609	scl0233057.1_74-S	NM_173738.2		scl0233057.1_74
H2-L	529.6	718.7	1	1	41.6426	scl014980.6_15-S			scl014980.6_15
D7Rp2e	125.4	179.6	0.9994	1	41.8008	scl31469.3.28_7-S	NM_033080.1	D7Rp2;D7Rp2-r;D7Rp2-s;RP2-r;RP2-s	scl31469.3.28_7
2610528E23Rik	0	32.1	0.6051	0.995	41.8088	scl48370.15.1_106-S	XM_148465.1	1110001A06Rik;4930572F24Rik;AV122629	scl48370.15.1_106
LOC243902	0.2	20.9	0.5945	0.9875	42.9748	GI_38086206-S	XM_145500.4		GI_38086206
Mrps12	625.8	1167	1	1	43.807	scl0024030.2_121-S	NM_011885.2	Rpms12;rps12	scl0024030.2_121
Mobp	921.1	1262.9	1	1	45.4947	ri|2900076O11|ZX00069D24|AK013799|1477-S	AK013799		ri|2900076O11|ZX00069D24|AK013799|1477
Mrpl48	199.8	509.5	1	1	45.541	scl000226.1_3-S	NM_026971.2	1810030E20Rik;2610028L11Rik;CGI-118;D4Ertd786e	scl000226.1_3
1110014L17Rik	240	338.4	1	1	46.2599	scl0103694.3_1-S	NM_134020.1	AI326346	scl0103694.3_1
Sbsn	101.2	151.3	0.9994	1	46.4214	scl0073733.1_231-S	NM_172205		scl0073733.1_231
2810037C03Rik	414.9	578.4	1	1	47.1385	scl35013.8.1_0-S	NM_024240.3	4933405K01Rik;Sld5	scl35013.8.1_0
2810036L13Rik	153.7	224.4	1	1	49.1472	scl49589.13.8_8-S	NM_144802.2	2510028H02Rik	scl49589.13.8_8
Ccl25	24	61.1	0.9869	0.9981	52.4962	scl020300.5_12-S	NM_009138.1	CKb15;Scya25;TECK	scl020300.5_12
Pnrc2	5.1	92.6	0.8378	0.9994	53.0832	scl23667.4_0-S	NM_026383.1	0610011E17Rik;D4Bwg0593e;MGC11707	scl23667.4_0
Eya3	0	38.4	0.5995	0.9956	53.5436	scl014050.16_119-S	NM_010166.2		scl014050.16_119
Dedd2	81	142	0.9988	1	53.8063	scl0067379.1_289-S	NM_207677.1	2410050E11Rik;FLAME-3	scl0067379.1_289
6330415F13Rik	371.9	581.2	1	1	54.0203	scl0070747.2_23-S	NM_027533.1	B230119D02Rik	scl0070747.2_23
Emp2	108.6	166.9	0.9994	1	54.2127	scl48775.5_265-S	NM_007929.1	XMP	scl48775.5_265
H2-D1	675.5	1000.8	1	1	54.4578	GI_31088857-S	NM_010380.2	H-2D;H2-D	GI_31088857
Dcn	67.9	118.8	0.9981	0.9994	54.9332	scl013179.1_84-S	NM_007833.1	DC;DSPG2;PG40;PGII;PGS2;SLRR1B	scl013179.1_84
Hapln4	519.3	769.7	1	1	55.6574	scl33741.4_276-S	NM_177900.3	9330174O11;Bral2;Lpr4	scl33741.4_276
MGC67181	14.5	95.4	0.9694	0.9994	55.9261	scl0075615.1_61-S	NM_198619.1		scl0075615.1_61
Eif3s2	314.3	1157.9	1	1	57.5435	scl0002776.1_66-S	NM_018799	36kDa;D4Ertd632e;Trip1	scl0002776.1_66
Mrps12	830.3	1399.6	1	1	58.127	scl31573.3_3-S	NM_011885	Rpms12;rps12	scl31573.3_3
1110063F24Rik	43.1	331.7	0.995	1	60.0152	scl24913.11_38-S	NM_133889.2	AW011758	scl24913.11_38
AI838661	19	161.3	0.9807	1	60.0201	scl24858.5.1_216-S	NM_133884.1		scl24858.5.1_216
1110005F07Rik	22.9	532.3	0.9863	1	61.5973	scl23602.11_383-S	NM_025383		scl23602.11_383
Hbb-b1	94.2	6818.6	0.9994	1	61.6989	ri|2510039D09|ZX00056J15|AK011053|630-S	AK011053		ri|2510039D09|ZX00056J15|AK011053|630
4931440N07Rik	25.3	57.9	0.9875	0.9981	61.7677	scl0381560.1_274-S	NM_201368.1	Gm1031;MGC67219	scl0381560.1_274
Trim3	1	45.4	0.6613	0.9969	62.2979	scl30884.8.1_32-S	NM_018880.1	BERP1;HAC1;Rnf22	scl30884.8.1_32
Ugt8	256.9	386.7	1	1	63.5589	scl21552.7_36-S	NM_011674.2	Cgt	scl21552.7_36
Serpinh1	196	311.4	1	1	66.5282	scl012406.1_153-S	NM_009825	BERF-1;Cbp1;Cbp2;colligin;gp46;Hsp47;J6;Serpinh2	scl012406.1_153
Pak1	6	205.7	0.8715	1	74.2349	scl018479.15_43-S	NM_011035	PAK-1	scl018479.15_43
D7Rp2e	388.4	822.4	1	1	80.1299	scl00110959.1_154-S	NM_033080.1	D7Rp2;D7Rp2-r;D7Rp2-s;RP2-r;RP2-s	scl00110959.1_154
Myo7a	6.4	42.2	0.8752	0.9963	89.271	scl017921.2_30-S	NM_008663.1	Myo7;sh-1;sh1;USH1B	scl017921.2_30
Rrm1	20	62.8	0.9819	0.9981	90.8549	scl32275.19.1_102-S	NM_009103	RnrM1	scl32275.19.1_102
B230312I18Rik	8.9	114.2	0.9214	0.9994	296.241	scl32830.4_10-S	NM_172740.1	B230119D13	scl32830.4_10
Psmd8	83.5	1050	0.9988	1	371.334	scl0057296.1_256-S	NM_026545.1	6720456J22Rik;C76433	scl0057296.1_256

## Sheet: B
Upregulated genes (Diff_Score≥13/P≤0.05) in liver of Mcph1gt/gt mice.
Gene	Signal intensity (3 wild type mice)	Signal intensity (3 Mcph1gt/gt mice)	Detection rate (3 wild type mice)	Detection rate (3 Mcph1gt/gt mice)	Diff_Score (Mcph1gt/gt / wild type)	Target ID	Accession	Synonyms	Transcript ID
Srpx2	26.9	45.3	0.9906	0.9969	13.0083	scl068792.10_256-S	NM_026838.1		scl068792.10_256
Dnmt2	-9.6	3.5	0.0331	0.6981	13.0133	scl0003315.1_3-S	NM_010067.2		scl0003315.1_3
1500010J02Rik	116.4	156.6	1	1	13.0351	scl41382.23.1_64-S	NM_026889.1		scl41382.23.1_64
Pold3	25	43.1	0.99	0.9969	13.0647	scl30991.12_298-S	NM_133692.1	2410142G14Rik;P66;P68	scl30991.12_298
Rasgrp1	59.8	101.3	0.9988	1	13.1276	scl0019419.1_154-S	NM_011246.2	Rasgrp	scl0019419.1_154
B430214A04Rik	550.2	686.6	1	1	13.1812	scl40154.14_234-S	NM_146018.1	Bhd;MGC37841	scl40154.14_234
Irf6	214.1	294.9	1	1	13.1938	scl000894.1_2293-S	NM_016851.1	E230028I05Rik;mirf6	scl000894.1_2293
Fbp3	28.6	48.4	0.9925	0.9969	13.2121	scl0014122.1_142-S			scl0014122.1_142
Rab32	374.9	488.5	1	1	13.2581	scl38210.4_147-S	NM_026405.2	2810011A17Rik	scl38210.4_147
Fbxw5	13.3	452.8	0.9526	1	13.27	scl030839.9_291-S	NM_013908.1	Fbw5	scl030839.9_291
Btg1	313.5	451.1	1	1	13.2712	scl0012226.2_9-S	NM_007569.1		scl0012226.2_9
Sdsl	122	180	1	1	13.296	scl26118.9.1_34-S	NM_133902.2	4432411H13Rik;AI504310;SDS-RS1	scl26118.9.1_34
Lars	594.7	749.3	1	1	13.3225	scl51469.24.1_0-S			scl51469.24.1_0
Grhpr	1811.4	2218.9	1	1	13.3246	scl25480.9.1_148-S	NM_080289.1	1110059D05Rik;6430629L09Rik	scl25480.9.1_148
Elovl2	19.3	41.7	0.9825	0.9969	13.3336	scl44057.9_18-S	NM_019423.1	Ssc2	scl44057.9_18
Rab6	53.1	94.8	0.9975	1	13.3724	scl00072.1_32-S	NM_024287.2	2610028L11Rik	scl00072.1_32
Ngfr	35.1	53.9	0.9956	0.9981	13.3729	scl39687.7_423-S	NM_033217	LNGFR;p75;p75NGFR;p75NTR;Tnfrsf16	scl39687.7_423
Nme7	40.4	60.1	0.9963	0.9994	13.3877	scl000815.1_22-S	NM_138314.1	D530024H21Rik;Nm23-M7;Nm23-r7	scl000815.1_22
Tram1	171.2	223.8	1	1	13.4229	scl072265.1_70-S	NM_028173.1	1810049E02Rik;MGC1174;TRAMP	scl072265.1_70
Slc11a2	174.8	224.9	1	1	13.4243	ri|C630004B07|PX00083H04|AK049856|4321-S	AK049856	DCT1;DMT1;mk;Nramp2;van	ri|C630004B07|PX00083H04|AK049856|4321
9130020G22Rik	35.7	70.4	0.9956	0.9994	13.4346	scl074552.1_14-S	XM_131773.3		scl074552.1_14
Dexi	80	108.3	0.9994	1	13.455	scl058239.1_71-S	NM_021428.3	1810029J14Rik;D16Bwg0586e;Myle	scl058239.1_71
E030003N15Rik	55.7	78	0.9975	1	13.466	scl0105841.13_268-S	XM_128129.4		scl0105841.13_268
Cd6	-0.8	14.9	0.539	0.9601	13.4669	scl52743.13.1_197-S	NM_009852		scl52743.13.1_197
C530044G15Rik	14.1	36	0.9619	0.9969	13.4872	ri|C530044G15|PX00669H18|AK083075|3151-S	AK083075		ri|C530044G15|PX00669H18|AK083075|3151
Npc2	35.3	57.5	0.9956	0.9988	13.4917	scl42239.4_289-S	NM_023409.3	2700012J19Rik;HE1	scl42239.4_289
0610012D14Rik	96.9	144.1	1	1	13.5202	scl000220.1_86-S	NM_026690.1		scl000220.1_86
Fbxo44	5	19.7	0.7829	0.9825	13.5438	scl23522.8_437-S	NM_173401.1		scl23522.8_437
Tmie	210.5	350.3	1	1	13.5492	scl35308.7.1_3-S	NM_146260.1	5131400L21Rik;Mm.87012;sr	scl35308.7.1_3
Rab17	112.6	174.8	1	1	13.5653	scl000833.1_81-S	NM_008998.2		scl000833.1_81
Pafah2	490.8	639.1	1	1	13.5761	scl24847.12_324-S	NM_133880	2310074E22Rik	scl24847.12_324
9530090G24Rik	36.2	60.9	0.9963	0.9994	13.582	scl0003220.1_15-S	NM_145537.1		scl0003220.1_15
Ccdc9	233.7	352.9	1	1	13.6668	scl0243846.1_330-S	NM_172297.1	2600011L02Rik	scl0243846.1_330
Cyp2c70	6270.2	8511.1	1	1	13.6845	scl52508.10.1_140-S	NM_145499.1		scl52508.10.1_140
Ccrk	85.6	114.8	0.9994	1	13.7331	scl44672.5.1_29-S	NM_053180.2		scl44672.5.1_29
Slc24a6	1137.4	1572.7	1	1	13.7641	scl27294.16.1_239-S	NM_133221.1	NCKX6	scl27294.16.1_239
Psmb8	74	107	0.9994	1	13.7834	scl0016913.2_8-S	NM_010724.1	Lmp-7;Lmp7	scl0016913.2_8
Cxcl16	85.9	121.9	0.9994	1	13.8467	scl0066102.2_212-S	NM_023158.3	0910001K24Rik;SR-PSOX	scl0066102.2_212
4933421G18Rik	87.6	117.8	1	1	13.8503	scl071175.1_21-S	XM_127929.3		scl071175.1_21
Erdr1	314.1	649.7	1	1	13.8771	scl0170942.1_210-S	NM_133362	edr;MGC5764	scl0170942.1_210
Bok	144.4	194.7	1	1	13.8934	scl051800.6_308-S	NM_016778	matador;Mtd	scl051800.6_308
Hspbap1	27.8	45.9	0.9906	0.9969	13.9148	scl0066667.2_152-S	NM_175111.2	3830421G21Rik	scl0066667.2_152
Ptpn18	31.5	54.1	0.9956	0.9988	13.9294	scl18090.14.9_4-S	NM_011206.1	FLP1;HSCF;PTP-HSCF;PTP-K1;Ptpk1	scl18090.14.9_4
Insig2	993.4	1320.5	1	1	13.9501	scl000923.1_16-S	NM_178082.2	2900053I11Rik;C730043J18Rik;Insig-2	scl000923.1_16
8430408G22Rik	772.7	1636.7	1	1	13.9609	scl29590.2_145-S	NM_145980.1	Fseg;MGC6835	scl29590.2_145
Grb7	2064.6	2513.7	1	1	13.9712	scl40936.14_9-S	NM_010346		scl40936.14_9
BC052040	101.5	140	1	1	13.9722	scl0399568.11_99-S	NM_207264.2	MGC62402	scl0399568.11_99
Ets2	115	162.6	1	1	13.9769	scl023872.11_215-S	NM_011809.2	Ets-2	scl023872.11_215
Irf5	50	77.9	0.9969	1	14.0057	scl30286.11_185-S	NM_012057.1	mirf5	scl30286.11_185
Thra	0.6	15.9	0.5808	0.9582	14.0123	scl0001499.1_97-S	NM_178060.2	6430529J03Rik;Erba;Nr1a1;Rvr;T3R[a];T3Ralpha;Thra1;Thra2	scl0001499.1_97
Rab7l1	236.8	296.2	1	1	14.0384	scl17491.6.1_47-S	NM_144875.1	MGC28972;MGC36539	scl17491.6.1_47
Sel1h	502.6	618.3	1	1	14.0386	scl020338.1_17-S	NM_011344.1		scl020338.1_17
Papss1	114	148.1	1	1	14.0807	scl22605.15.1_7-S	NM_011863.1	Asapk;SK1	scl22605.15.1_7
Stxbp1	76.9	107.5	0.9994	1	14.095	scl020910.1_1-S	NM_009295.1	MMS10-G;Ms10g;Munc-18a;Munc18-1;N-sec1;nsec1;Rb-sec1;Sxtbp1;Unc18h	scl020910.1_1
Rnpep	386.7	497.2	1	1	14.0966	scl16258.13.1_64-S	NM_145417	MGC29229	scl16258.13.1_64
Osgep	100.3	138.5	1	1	14.1224	scl45612.9.1_2-S	NM_133676.1	1500019L24Rik;GCPL-1;PRSMG1	scl45612.9.1_2
Spg21	339.2	420.7	1	1	14.1772	scl36804.10.1_24-S	NM_138584.1		scl36804.10.1_24
Elmo1	41.9	64.4	0.9969	0.9994	14.2068	scl0003760.1_927-S	NM_198093.2	6330578D22Rik;C230095H21Rik;CED-12	scl0003760.1_927
2810441C07Rik	77.1	104.4	0.9994	1	14.3774	scl23613.33_174-S	NM_172415.2	mKIAA1626	scl23613.33_174
Nutf2	72.9	99.5	0.9994	1	14.3826	scl0068051.1_156-S	NM_026532.2	2700067I02Rik;Ntf2;Ntf3;PP15	scl0068051.1_156
A330049M08Rik	-6.9	26.7	0.121	0.99	14.4046	scl23674.9_251-S	NM_145555		scl23674.9_251
2010106G01Rik	221.7	294	1	1	14.4126	scl0066552.1_146-S	NM_023220.1	C130089K23Rik	scl0066552.1_146
Ube2l3	897.1	1114.8	1	1	14.452	scl48709.7_108-S	XM_148568.1	C79827;Ubce7;UbcM4	scl48709.7_108
A030007L17Rik	146.1	199.8	1	1	14.465	scl0001144.1_51-S	NM_026637.2		scl0001144.1_51
Sipa1l1	304.9	380.1	1	1	14.4685	scl00217692.2_267-S	NM_172579.1	4931426N11;4931426N11Rik;mKIAA0440	scl00217692.2_267
Iqgap1	40.9	66.7	0.9963	0.9994	14.4754	scl0029875.2_286-S	NM_016721.1	D7Ertd237e;D7Ertd257e;mKIAA0051	scl0029875.2_286
Edg5	165.8	237	1	1	14.5475	scl36156.3_7-S	NM_010333	1100001A16Rik;Gpcr13;H218;LPb2;S1P2	scl36156.3_7
AI132321	77.7	114.6	0.9994	1	14.5583	scl42725.12.1_79-S	NM_178911.2		scl42725.12.1_79
Plxna2	101.5	196.4	1	1	14.5842	scl0018845.2_170-S	NM_008882.1	2810428A13Rik;mKIAA0463;OCT;Plxn2	scl0018845.2_170
Fasn	366.9	601.1	1	1	14.6107	scl014104.1_1-S	NM_007988.1	A630082H08Rik;FAS	scl014104.1_1
Bcl10	72.4	99.5	0.9994	1	14.6161	scl22486.4_311-S	NM_009740.1	BCL-10;CARMEN;cE10;CIPER;CLAP;ME10	scl22486.4_311
Dscr1l2	41.3	69.7	0.9963	0.9994	14.6164	scl0053902.1_216-S	NM_022980.2		scl0053902.1_216
D6Wsu176e	69.1	95.3	0.9994	1	14.6381	scl29247.11.6_29-S	NM_138587.3		scl29247.11.6_29
Dio1	172.4	290.8	1	1	14.6715	scl0002682.1_0-S	NM_007860	D1	scl0002682.1_0
Cai	921.6	1170.1	1	1	14.752	scl29051.11.1_27-S	NM_009787.1	Erp72	scl29051.11.1_27
Klf2	57.6	108.7	0.9975	1	14.7629	scl016598.3_26-S	NM_008452.1	Lklf	scl016598.3_26
Txnl4b	188.8	264.2	1	1	14.8504	scl33340.4_635-S	NM_175646.2		scl33340.4_635
Tcta	430.1	534.5	1	1	14.8644	scl00102791.2_289-S	NM_133986.1		scl00102791.2_289
Drbp1	31.7	54.8	0.9956	0.9981	14.8913	GI_23510272-A	NM_153405.1	Drb1;G430095G15Rik	GI_23510272
Zfp313	56.3	84	0.9975	1	14.9062	scl19885.7_41-S	NM_030743.3	1110008J21Rik;Zfp228;Znf228	scl19885.7_41
Faf1	1046.8	1289.9	1	1	14.9558	scl25126.19.1_29-S	NM_007983.2	Dffrx;Fam	scl25126.19.1_29
Dnmt3b	72.4	99.7	0.9994	1	14.9808	scl20092.24_625-S	NM_010068.1		scl20092.24_625
Cdk5rap1	54.9	104.9	0.9975	1	14.9814	scl18476.16.14_21-S	NM_025876.1	2310066P17Rik	scl18476.16.14_21
Nedd4l	753.3	997.5	1	1	15.0657	scl0083814.1_187-S	NM_031881.1	1300012C07Rik;Nedd4-2;Nedd4b	scl0083814.1_187
Stambp	210.1	273.8	1	1	15.0903	scl28793.10_326-S	NM_024239.1	5330424L14Rik;5730422L11Rik;Amsh	scl28793.10_326
Evi5	468.9	589.3	1	1	15.0951	scl26258.25_611-S	NM_007964.1	NB4S	scl26258.25_611
2810007J24Rik	135.7	229.9	1	1	15.1192	scl31737.12_81-S	NM_175250.3		scl31737.12_81
Il18bp	128.4	180.1	1	1	15.1383	scl30953.4_24-S	NM_010531.1	Igifbp;IL-18BP;MC54L	scl30953.4_24
Cyp2b13	630.6	3308.7	1	1	15.2631	scl013089.9_98-S	NM_007813.1		scl013089.9_98
Bcl6	115.6	364.4	1	1	15.287	scl48625.8_280-S	NM_009744.2	Bcl5	scl48625.8_280
Ccbp2	59.2	86	0.9988	1	15.3291	scl36315.5_684-S	NM_021609.2	CCR10;CCR9;Cmkbr9;D6	scl36315.5_684
Admr	421.9	585.4	1	1	15.3311	scl011536.1_57-S	NM_007412.1	AM-R;G10-D;Gpcr17;Gpcr22;MB10;NOW	scl011536.1_57
Frag1	49.8	77.9	0.9975	1	15.3769	scl32282.14.1_19-S	NM_145583.1		scl32282.14.1_19
BC036718	132.4	187.1	1	1	15.3781	scl00213484.2_217-S	NM_153136.1	MGC38179	scl00213484.2_217
Slc27a5	5236.9	7544.9	1	1	15.3788	scl31750.10.1_0-S	NM_009512	FACVL3;FATP5;Vlacsr;VLCS-H2;VLCSH2	scl31750.10.1_0
6720407G21Rik	41.4	132.1	0.9963	1	15.3976	scl0077733.1_129-S	XM_133272		scl0077733.1_129
Pecam1	268	357.8	1	1	15.4266	scl39433.17_301-S	NM_008816		scl39433.17_301
Pdzx	138.8	193.7	1	1	15.4825	scl54446.7.1_267-S	NM_018832.1	Sfc18	scl54446.7.1_267
Rpl13a	183.7	237	1	1	15.6494	gi_32129296_ref_NM_009438.3__526-S	NM_009438.3	1810026N22Rik;Tstap198-7;tum-antigen	gi_32129296_ref_NM_009438.3__526
1500031H04Rik	15.6	35.8	0.9644	0.995	15.6735	scl54605.3_321-S	NM_025893.1		scl54605.3_321
4833446K15Rik	49.6	73.4	0.9969	1	15.7366	scl51902.3.1_179-S	NM_178636		scl51902.3.1_179
Chd9	80	118.9	0.9994	1	15.8245	scl33522.11_60-S	XM_284439.2		scl33522.11_60
3830422K02Rik	137.4	213.1	1	1	15.828	scl32158.14.1_0-S	NM_173767.2	C730020D23	scl32158.14.1_0
Btg1	611.5	935	1	1	15.8311	scl012226.1_1-S	NM_007569.1		scl012226.1_1
Oprs1	644.2	959.1	1	1	15.9188	scl018391.1_236-S	NM_011014.1	mSigmaR1	scl018391.1_236
E230024B12Rik	44.7	67.8	0.9969	0.9994	16.0364	ri|E230024B12|PX00209D12|AK087605|2166-S	AK087605		ri|E230024B12|PX00209D12|AK087605|2166
D5Ertd606e	266.3	367.2	1	1	16.1547	scl052398.2_175-S			scl052398.2_175
1110018J18Rik	124.9	173.4	1	1	16.1671	scl066129.2_5-S	NM_025370.1		scl066129.2_5
Dhrsx	202.9	271.6	1	1	16.2134	GI_38093468-S	XM_135485.4		GI_38093468
Cxcl9	22.4	59.2	0.9888	0.9994	16.2864	scl26373.4_395-S	NM_008599	CMK;crg-10;Mig;Scyb9	scl26373.4_395
Dpp8	56.9	100	0.9975	1	16.2914	scl36817.19_229-S	NM_028906.2	4932434F09Rik	scl36817.19_229
Cklfsf6	230.3	294.8	1	1	16.3015	scl36385.5_13-S	NM_026036.1	2810051A14Rik	scl36385.5_13
Sfrs10	23.1	42.7	0.99	0.9969	16.37	scl020462.9_41-S	NM_009186	SIG-41;Silg41;TRA2B;TRA2beta	scl020462.9_41
Ndrg1	35	58.1	0.9956	0.9988	16.3959	scl47123.18_98-S	NM_010884.1		scl47123.18_98
D2Bwg0891e	450.7	612.4	1	1	16.4208	scl052840.5_2-S	NM_026797.1	1110017A21Rik;2900022J10Rik	scl052840.5_2
Pitpnb	785.2	983	1	1	16.4994	scl27424.11_172-S	NM_019640.2		scl27424.11_172
Erdr1	22.4	59.8	0.99	0.9994	16.5519	scl00170942.1_90-S	NM_133362.1	edr;MGC5764	scl00170942.1_90
2410030J07Rik	85	272.9	0.9994	1	16.5604	scl23696.18_276-S	NM_144527.2		scl23696.18_276
9230105E10Rik	0.2	49.3	0.5633	0.9969	16.5985	scl00319236.1_170-S	NM_175677		scl00319236.1_170
9430098E02Rik	53.1	98.8	0.9975	1	16.7318	scl33704.1.431_29-S	XM_134253.3		scl33704.1.431_29
Klhdc2	18.1	40	0.9788	0.9969	16.74	scl43155.10.40_7-S	NM_027117.1	2310022K15Rik;D12Ertd522e;HCLP-1;LCP	scl43155.10.40_7
Plekhf1	67.3	112.8	0.9994	1	16.8819	scl31450.2_0-S	NM_024413.1	1810013P09Rik;APPD;PHAFIN1;ZFYVE15	scl31450.2_0
Rgs16	1136.8	2427.5	1	1	16.9516	scl17359.5_60-S	NM_011267.1	Rgs14;Rgsr	scl17359.5_60
Arhgef19	41	90.2	0.9969	1	17.0252	scl0213649.17_14-S	NM_172520.1		scl0213649.17_14
Pdlim4	31.9	55.5	0.9944	0.9988	17.0475	scl40219.8.1_51-S	NM_019417.1	Ril	scl40219.8.1_51
Agpat2	1161.9	1457.6	1	1	17.0814	scl0003011.1_11-S	NM_026212.1	2510002J07Rik;BSCL;BSCL1;LPAAB;LPAAT-beta	scl0003011.1_11
1110018J23Rik	60.8	88.6	0.9988	1	17.0902	scl073713.3_139-S	XM_140742.4		scl073713.3_139
Slc37a1	-5	11.6	0.2084	0.9289	17.1066	scl50878.24.1_13-S	NM_153062.1	G3PP;MGC28167	scl50878.24.1_13
1110060F11Rik	460.4	583.3	1	1	17.1135	scl23442.8_471-S	NM_026395.1	5830454N22Rik	scl23442.8_471
Mbc2	127	176	1	1	17.1325	scl37359.31.1_62-S	NM_011843.1	vp115	scl37359.31.1_62
Vsig4	860.4	1396.9	1	1	17.2744	scl54019.7.1_102-S	NM_177789.2		scl54019.7.1_102
C2	1685	2161.2	1	1	17.4611	scl50009.17.1_17-S	NM_013484.1		scl50009.17.1_17
Lst1	129.4	186.2	1	1	17.4762	scl016988.2_22-S	XM_359281.1		scl016988.2_22
Gpiap1	93.8	143.3	1	1	17.5144	scl0003202.1_259-S	NM_016739.2	Gpiap;MMGPIP137;P137	scl0003202.1_259
Rit1	190.2	252.5	1	1	17.5348	scl0019769.2_219-S	NM_009069.2	RIBB;Rit;ROC1	scl0019769.2_219
Hspcb	139.6	187	1	1	17.5502	scl015516.6_124-S	NM_008302.2	90kDa;Hsp84;Hsp84-1;Hsp90	scl015516.6_124
Ostb	12.1	31.2	0.9526	0.9944	17.5616	scl35692.3.1_12-S	NM_178933.2		scl35692.3.1_12
Ddc	314.3	505.7	1	1	17.8137	scl0013195.2_156-S	NM_016672.1	Aadc	scl0013195.2_156
C730049O14Rik	3.6	22.6	0.7573	0.9888	17.9857	scl0320117.3_188-S			scl0320117.3_188
AI850995	102.8	166	1	1	18.0253	scl44050.2_566-S	XM_488675		scl44050.2_566
Atbf1	79.2	111.8	0.9994	1	18.0308	scl011906.16_208-S	NM_007496.1	WBP9	scl011906.16_208
Ikbke	41	65.4	0.9963	0.9994	18.0549	GI_31981052-S	NM_019777.2	AW558201;IKK-i;IKKepsilon;Ikki	GI_31981052
Icam1	125.1	168.7	1	1	18.0904	scl37236.8_286-S	NM_010493.2	CD54;Icam-1;Ly-47;MALA-2;MGC6195	scl37236.8_286
6430544H17Rik	60.4	93.1	0.9988	1	18.0922	scl23904.2_250-S	NM_183140.1		scl23904.2_250
Rhod	173.9	229.4	1	1	18.1644	scl53459.3.1_19-S	NM_007485.2	Arhd;Rho;RhoHP1;RhoM	scl53459.3.1_19
Elovl5	6551.8	8252.3	1	1	18.1656	scl36684.10_99-S	NM_134255.2	1110059L23Rik;HELO1	scl36684.10_99
Tubb5	1443.4	1825.1	1	1	18.1745	scl022154.1_53-S	NM_011655.2	B130022C14Rik;M(beta)5	scl022154.1_53
D430022H17Rik	53.7	81.4	0.9975	1	18.1844	ri|D430022H17|PX00194G21|AK084998|1077-S	AK084998		ri|D430022H17|PX00194G21|AK084998|1077
Serpina3g	233.8	467.1	1	1	18.1877	scl020715.6_281-S	XM_354694.1		scl020715.6_281
1810045K06Rik	278.2	473	1	1	18.2225	scl24663.4_10-S	XM_144142.3		scl24663.4_10
H2-K1	103.4	154.2	1	1	18.3065	scl0014972.1_210-S	NM_001001892		scl0014972.1_210
Comt	4390.5	6080.2	1	1	18.3773	scl0012846.1_253-S	XM_147265.1	D16Wsu103e;D330014B15Rik	scl0012846.1_253
9130214H05Rik	38.3	65.3	0.9963	0.9994	18.4316	scl44201.10.1_39-S	NM_177016.2		scl44201.10.1_39
2210413P12Rik	109.5	165.5	1	1	18.5667	scl17488.7_66-S	NM_145977.1	MGC32471;Prostein	scl17488.7_66
Nup210	366	531.5	1	1	18.6075	scl28688.42_395-S	NM_018815.1	9830001L10;gp190;gp210;Pom210	scl28688.42_395
Smpdl3b	6.4	32.9	0.8447	0.995	18.759	scl23726.8.8_267-S	NM_133888.1	1110054A24Rik;Asml3b	scl23726.8.8_267
Cldn5	163	244.2	1	1	18.8364	scl49357.1.362_28-S	XM_147222.1	AI854493;MBEC1;TMVCF	scl49357.1.362_28
Ddhd1	26.2	59	0.99	0.9994	18.8782	scl45663.15_583-S	NM_176845		scl45663.15_583
Gpsn2	2831.8	3726.3	1	1	18.9027	scl000669.1_31-S	NM_134118.1	2410016D23Rik;A230102P12Rik;D17Ertd178e;SC2	scl000669.1_31
Fbxl17	116.7	159.5	1	1	18.9556	scl49708.14_0-S	XM_128716.2		scl49708.14_0
Cd86	-4.8	12.4	0.2302	0.9426	18.9972	scl0001798.1_46-S	NM_019388.2	B7;B7-2;B70;Cd28l2;CLS1;Ly-58;Ly58;MB7;TS/A-2	scl0001798.1_46
2610300B10Rik	38.4	87.5	0.9963	1	19.0545	scl17312.6.2217_8-S	XM_283661		scl17312.6.2217_8
BC016188	136.9	185	1	1	19.1409	scl34568.25_184-S	NM_145970.1	MGC27560;MGC38983	scl34568.25_184
Nudt4	65.9	96.7	0.9994	1	19.1638	scl37580.8_154-S	NM_027722.2	4933436C10Rik;DIPP2;DIPP2alpha;DIPP2beta;HDCMB47P	scl37580.8_154
Sh3bgrl3	107.5	175.4	1	1	19.1735	scl23697.3.1_58-S	NM_080559.1	1110004L05Rik	scl23697.3.1_58
Abhd2	28.9	51.9	0.9925	0.9981	19.2276	scl32499.13.1_37-S	NM_018811.4	2210009N18Rik;Labh-2;LABH2	scl32499.13.1_37
Ptprk	248.2	325.8	1	1	19.3739	scl019272.9_136-S	NM_008983		scl019272.9_136
Apoc2	76.8	283.1	0.9994	1	19.4805	scl011813.3_68-S	NM_009695.2		scl011813.3_68
Gale	53.1	111.5	0.9975	1	19.5447	scl074246.9_1-S	NM_178389.2	2310002A12Rik	scl074246.9_1
2610002J02Rik	134.8	183.3	1	1	19.6167	scl24628.3.441_60-S	XM_131827.3		scl24628.3.441_60
B930075F07	153.3	206.7	1	1	19.6744	scl54719.1.3_182-S			scl54719.1.3_182
Etohd2	27.4	104	0.9906	1	19.69	scl013996.2_4-S			scl013996.2_4
D10Ertd610e	12.2	44.8	0.9507	0.9969	19.7278	scl0003818.1_1-S	NM_028027.1	2410008H17Rik;GEFT	scl0003818.1_1
Lmo2	128.2	175.3	1	1	19.7432	scl016909.6_211-S	NM_008505.3	Rbtn-2;Rbtn2;Rhom-2;Ttg2	scl016909.6_211
Anapc1	50	77.9	0.9969	1	19.7537	scl0017222.2_194-S	NM_008569.1	2610021O03Rik;Apc1;Mcpr;tsg24	scl0017222.2_194
Etnk2	723.9	2609.9	1	1	19.7838	scl17463.8_535-S	NM_175443	4933417N20Rik;Eki2;Tuc1	scl17463.8_535
2510002J07Rik	636.1	820.6	1	1	19.813	ri|0610009M19|R000002A16|AK002422|690-S	AK002422		ri|0610009M19|R000002A16|AK002422|690
Rpl13a	334.9	455.5	1	1	19.853	scl022121.1_118-S	NM_009438	1810026N22Rik;Tstap198-7;tum-antigen	scl022121.1_118
Lbp	323.9	423.4	1	1	19.8612	scl20002.16.7_10-S	NM_008489	Ly88	scl20002.16.7_10
Iap	730.1	1172.9	1	1	20.1635	scl0015598.1_13-S	NM_010490		scl0015598.1_13
1810011O10Rik	43.9	73.5	0.9969	1	20.2001	scl35011.1.33_50-S	NM_026931.1	1110065B09Rik	scl35011.1.33_50
Psmb8	972.9	1324.5	1	1	20.2593	scl50828.7.1_115-S	NM_010724	Lmp-7;Lmp7	scl50828.7.1_115
Mup3	2935.5	5399.6	1	1	20.2773	scl017842.1_177-S	NM_010845	MUP III;Mup-3;MUP15	scl017842.1_177
Rgmc	356.8	496.5	1	1	20.2849	scl22860.4.705_3-S	NM_027126.2	2310035L15Rik;5230400G09Rik	scl22860.4.705_3
Ngfa	19.1	45.4	0.9825	0.9969	20.4062	scl018050.1_7-S	NM_010915.1	mGk-4	scl018050.1_7
Insig2	132.5	264.1	1	1	20.6103	scl000765.1_6-S	NM_178082.2	2900053I11Rik;C730043J18Rik;Insig-2	scl000765.1_6
Psmb9	202.9	285.9	1	1	20.6544	scl50027.4.1_35-S	NM_013585.1	Lmp-2;Lmp2	scl50027.4.1_35
2900064B18Rik	35.2	66	0.9956	0.9994	20.6711	scl48626.2.1_273-S			scl48626.2.1_273
Hsd17b2	593.3	936.6	1	1	20.6821	scl33266.7.1_26-S	NM_008290.1		scl33266.7.1_26
9530090G24Rik	1578.2	2047	1	1	21.18	scl00108687.2_201-S	NM_145537.1		scl00108687.2_201
Sfrs16	10.7	53.3	0.9089	0.9975	21.2404	scl31678.22.1_32-S	NM_016680	Clasp;Swap2	scl31678.22.1_32
Rrm1	14.8	50.6	0.9601	0.9969	21.3193	scl32275.19.1_102-S	NM_009103	RnrM1	scl32275.19.1_102
A930016D02Rik	118.6	423.3	1	1	21.6292	scl0319476.2_26-S	NM_176920.2		scl0319476.2_26
A130065C13Rik	-3.1	19.2	0.3032	0.9869	21.7606	ri|A130065C13|PX00124A20|AK037935|681-S	AK037935		ri|A130065C13|PX00124A20|AK037935|681
BC035522	99.2	142.3	1	1	21.8496	scl0230696.1_8-S	XM_355513		scl0230696.1_8
1110012M11Rik	290	410	1	1	22.0479	scl33697.10.1_67-S	NM_028617.2		scl33697.10.1_67
Zmpste24	149.7	206.6	1	1	22.0812	scl00230709.1_4-S	NM_172700.1	A530043O15Rik;D030046F19;Face-1	scl00230709.1_4
9430051O21Rik	41.6	69.7	0.9969	0.9994	22.1002	scl25331.1.514_296-S			scl25331.1.514_296
Dexi	38.3	65.7	0.9963	0.9994	22.2081	scl0058239.1_184-S	NM_021428.3	1810029J14Rik;D16Bwg0586e;Myle	scl0058239.1_184
Etnk2	9.7	53.4	0.9289	0.9969	22.3459	scl00214253.2_23-S	NM_175443.2	4933417N20Rik;Eki2;Tuc1	scl00214253.2_23
Fbxo6b	991.5	1370.2	1	1	22.4057	scl23523.7.1_20-S	NM_015797.1	FBG2;Fbs2;Fbx6b	scl23523.7.1_20
Fgfr2	496.9	657.7	1	1	22.6234	scl30605.20_54-S	NM_010207	Bek;Fgfr-2;Fgfr-7;Fgfr7;KGFRTr	scl30605.20_54
Wrnip1	140.8	196.3	1	1	22.7205	scl0003612.1_5-S	NM_030215	4833444L21Rik;WHIP;Wrnip	scl0003612.1_5
Sppl3	582.4	769.8	1	1	22.7607	scl27370.13_382-S	NM_029012.1		scl27370.13_382
Cklfsf7	52.8	93.9	0.9975	1	22.7718	scl0003450.1_9-S	NM_133978.1		scl0003450.1_9
Pml	250.6	338.5	1	1	22.836	scl0018854.2_223-S	NM_008884.2	1200009E24Rik;Trim19	scl0018854.2_223
5730408I21Rik	490.7	810.2	1	1	23.0109	scl0003728.1_3-S	XM_127397.4		scl0003728.1_3
AI132487	12561.7	16418.2	1	1	23.0968	scl42792.7_29-S	XM_127129.3		scl42792.7_29
Gdi3	461.7	1706.3	1	1	23.1095	scl014569.11_60-S	NM_008112.2	GDI-B;GDIB	scl014569.11_60
Ibrdc2	428.2	571.5	1	1	23.3168	scl44812.9_513-S	NM_146042	E130105P19Rik;MGC32473	scl44812.9_513
Hdac1	122.8	181.3	1	1	23.3562	scl015181.3_0-S	NM_008228.1	HD1;RPD3	scl015181.3_0
Mmp14	323.8	435.8	1	1	23.4728	scl46305.13_322-S	NM_008608.2	MT1-MMP	scl46305.13_322
Ap1b1	516.2	687.5	1	1	23.5138	scl011764.20_169-S	NM_007454	Adtb1	scl011764.20_169
Iap	1005.2	1533.3	1	1	23.7228	GI_24475922-S	NM_010490.2		GI_24475922
Hbb-b1	2500.4	10005.6	1	1	23.8113	ri|2510040I07|ZX00060E20|AK011067|627-S	AK011067		ri|2510040I07|ZX00060E20|AK011067|627
2210016H18Rik	64.5	102.7	0.9994	1	23.9208	scl52249.2.1732_190-S			scl52249.2.1732_190
Cyp2d9	268.6	829.5	1	1	23.9316	scl47686.9.1_164-S	NM_010006.1	Cyp2d;P450-2D	scl47686.9.1_164
LOC382058	24.2	67.6	0.99	0.9994	24.0944	GI_38089675-S	XM_356133.1		GI_38089675
AA175286	131.6	197.4	1	1	24.1635	scl29327.6.1_41-S	NM_010156.2	ESTM25	scl29327.6.1_41
Gpiap1	110	159.2	1	1	24.2059	scl0053872.2_123-S	NM_016739.2	Gpiap;MMGPIP137;P137	scl0053872.2_123
Slc39a4	1397.4	1876.4	1	1	24.2131	scl47037.12.1_89-S	NM_028064.2	1600025H15Rik;ZIP4	scl47037.12.1_89
E230026L19Rik	103.3	185.6	1	1	24.5142	ri|E230026L19|PX00210N20|AK087624|1112-S	AK087624		ri|E230026L19|PX00210N20|AK087624|1112
A930016D02Rik	47.4	191.4	0.9969	1	24.5327	scl00319476.1_249-S	NM_176920.2		scl00319476.1_249
B230312I18Rik	6.7	29.1	0.8459	0.9938	24.5472	scl32830.4_10-S	NM_172740.1	B230119D13	scl32830.4_10
2310076O21Rik	70.5	108.9	0.9994	1	24.9205	scl32660.11_337-S	NM_144801.1		scl32660.11_337
4930481A15Rik	18.3	81.9	0.9832	1	25.2257	scl074931.4_20-S	XM_148889.4		scl074931.4_20
Cxcl9	324.4	691.9	1	1	25.6004	scl0017329.2_123-S	NM_008599.1	CMK;crg-10;Mig;Scyb9	scl0017329.2_123
1110015E22Rik	14.6	47.2	0.9576	0.9969	25.9343	scl32054.9.1_17-S	NM_024228.1		scl32054.9.1_17
9430080K19Rik	97.7	164.6	1	1	26.0247	scl18038.1.15_227-S			scl18038.1.15_227
Llglh2	281.2	388.2	1	1	26.2071	scl40719.31.1_148-S	NM_145438.1	9130006H11Rik;MGC27928	scl40719.31.1_148
Ick	100.7	149.9	1	1	26.4508	scl0056542.1_233-S	NM_019987.1		scl0056542.1_233
Csnk2a2	455.5	624.5	1	1	27.1819	scl013000.1_10-S	NM_009974.2	1110035J23Rik;CK2	scl013000.1_10
Mrpl48	170.4	336.5	1	1	27.7484	scl000226.1_3-S	NM_026971.2	1810030E20Rik;2610028L11Rik;CGI-118;D4Ertd786e	scl000226.1_3
Parp14	84.5	138.4	0.9994	1	27.8401	scl00224133.1_32-S	NM_145481.1		scl00224133.1_32
Eya3	-4.8	20.6	0.2327	0.9875	28.0802	scl014050.16_119-S	NM_010166.2		scl014050.16_119
BC004728	587.3	831.6	1	1	28.1899	scl0207818.1_83-S	NM_174992.2	MGC7903	scl0207818.1_83
1810011E08Rik	1348.3	1837.4	1	1	28.3264	scl34807.5_39-S			scl34807.5_39
4921521J11Rik	71.5	114.3	0.9994	1	28.4411	scl0070885.2_95-S	NM_027590.1		scl0070885.2_95
1110033J19Rik	89.5	156.4	1	1	28.5999	scl066184.1_108-S	NM_025405.1		scl066184.1_108
Trim34	8.7	38	0.9089	0.9963	28.67	scl0094094.2_63-S	NM_030684.1		scl0094094.2_63
H2-T9	1266.6	1739.7	1	1	29.1105	scl0015051.1_246-S	NM_010399	H-2T9	scl0015051.1_246
4931440N07Rik	7.5	50.7	0.8815	0.9981	29.2667	scl0381560.1_274-S	NM_201368.1	Gm1031;MGC67219	scl0381560.1_274
Snx24	189.7	273.1	1	1	29.2907	scl51946.9_43-S	NM_029394.2	2810011K15Rik;5730433I16Rik	scl51946.9_43
Spon2	222.6	532.1	1	1	29.5129	scl26719.6_100-S	NM_133903.2	2310045I24Rik;AI504350;M-spondin;Mindin	scl26719.6_100
BC049975	32.4	93.7	0.9956	1	30.7956	scl42835.7_546-S	XM_138237.2		scl42835.7_546
Hbb-b1	141.7	8047.6	1	1	32.291	ri|2510039D09|ZX00056J15|AK011053|630-S	AK011053		ri|2510039D09|ZX00056J15|AK011053|630
1110049F12Rik	342	590.3	1	1	33.092	scl066193.1_138-S	NM_025411.2	Trp26	scl066193.1_138
Lmyc1	54.8	103.9	0.9975	1	34.6237	scl24999.4_423-S	NM_008506.2	Lmyc-1	scl24999.4_423
Crip2	801.3	1163.1	1	1	35.691	scl068337.8_322-S	NM_024223.1	0610010I23Rik;Crp;CRP2;ESP1;Hlp	scl068337.8_322
Itm2c	499.3	727.5	1	1	36.7831	scl17725.6_585-S	NM_022417.1	3110038L02Rik;BRI3;E25;E25C;ITM3	scl17725.6_585
Frag1	27.8	79.3	0.9925	1	36.8854	scl000187.1_133-S	NM_145583.1		scl000187.1_133
Clock	203.7	308.2	1	1	37.1055	scl0012753.1_131-S	NM_007715.4	5330400M04Rik;mKIAA0334	scl0012753.1_131
H2-T17	1173.5	1694	1	1	37.3446	scl015032.1_236-S	NM_010396	H-2T17	scl015032.1_236
H2-T23	2561.6	3693.5	1	1	37.9799	scl015040.2_130-S	NM_010398	H-2T23	scl015040.2_130
Ndrl	63	115	0.9988	1	39.3784	scl017990.3_27-S	NM_008681	Tdd5	scl017990.3_27
Riok3	324.5	514.8	1	1	39.5139	scl066878.10_113-S	NM_024182.2	1200013N13Rik;Sudd	scl066878.10_113
Mrps12	646.7	1097.1	1	1	39.6361	scl0024030.2_121-S	NM_011885.2	Rpms12;rps12	scl0024030.2_121
Insig2	242.5	863.2	1	1	39.6635	scl000986.1_622-S	NM_133748.1	2900053I11Rik;C730043J18Rik;Insig-2	scl000986.1_622
Cldn1	276.6	668.2	1	1	40.3196	scl48613.5_237-S	NM_016674.2		scl48613.5_237
Folr2	190.3	345.4	1	1	41.7019	scl30960.6.1_9-S	NM_008035	FBP2;Folbp-2;Folbp2;FR-P3	scl30960.6.1_9
Gm592	58.9	115.8	0.9981	1	42.2141	scl0211914.1_94-S	NM_001004364		scl0211914.1_94
Rnf125	95.3	216.3	1	1	43.04	scl52208.4.1_8-S	NM_026301.1	4930553F04Rik	scl52208.4.1_8
Cxadr	91.7	410.8	0.9994	1	43.1333	scl48937.1.1_21-S	NM_009988	2610206D03Rik;CAR;MCAR	scl48937.1.1_21
Map3k7ip2	145.8	248.3	1	1	44.855	scl38232.7_17-S	NM_138667.1	1110030N06Rik;A530078N03Rik;mKIAA0733;Tab2	scl38232.7_17
Tjp3	115.6	206.1	1	1	46.033	scl37703.23.1_44-S	NM_013769.1	ZO-3	scl37703.23.1_44
Rbpms	258.9	410.8	1	1	47.1947	scl34939.16_10-S	NM_019733	2010300K22Rik;2700019M19Rik;hermes	scl34939.16_10
Pla1a	50.8	107.4	0.9969	1	47.282	scl48484.12.1_8-S	NM_134102	Ps-pla1;Pspla1	scl48484.12.1_8
Abhd8	45.8	96.2	0.9969	1	47.8802	scl34676.6_69-S	NM_022419.1	0910001L24Rik;AB030191	scl34676.6_69
Pla1a	157	318.1	1	1	48.9731	scl0001887.1_26-S	NM_134102	Ps-pla1;Pspla1	scl0001887.1_26
Ciapin1	284.8	464.7	1	1	53.0152	scl00109006.2_49-S	NM_134141.2		scl00109006.2_49
2410166I05Rik	48.2	108.7	0.9969	1	56.3573	scl23686.4_28-S	NM_029759.2		scl23686.4_28
1110005F07Rik	11.6	229.7	0.9513	1	57.858	scl23602.11_383-S	NM_025383		scl23602.11_383
1110063F24Rik	31.1	334.6	0.9944	1	58.957	scl24913.11_38-S	NM_133889.2	AW011758	scl24913.11_38
AI838661	22.1	191.6	0.99	1	67.8389	scl24858.5.1_216-S	NM_133884.1		scl24858.5.1_216
Plekhc1	442.5	767.9	1	1	69.0318	scl45667.15_40-S	NM_146054.1	MGC36305;Mig2	scl45667.15_40
St5	266.8	478.1	1	1	70.7641	scl30833.27_114-S	NM_029811.1	2010004M01Rik;2610305K15Rik	scl30833.27_114
Robo1	13.7	77	0.9532	1	75.9739	scl019876.3_41-S	NM_019413.1	DUTT1	scl019876.3_41
Clpx	741	1599.4	1	1	89.2447	scl36809.14.1_41-S	NM_011802.1	E330029I21	scl36809.14.1_41
Mrps12	998.5	2006.1	1	1	96.4923	scl31573.3_3-S	NM_011885	Rpms12;rps12	scl31573.3_3
1810029C22Rik	8.1	79.6	0.8933	1	108.558	scl35143.5_55-S	XM_284386.2		scl35143.5_55
Eif3s2	466.1	1617.2	1	1	125.362	scl0002776.1_66-S	NM_018799	36kDa;D4Ertd632e;Trip1	scl0002776.1_66
Pnrc2	7.8	84.6	0.8902	1	134.735	scl23667.4_0-S	NM_026383.1	0610011E17Rik;D4Bwg0593e;MGC11707	scl23667.4_0
Serpina12	125.1	850.9	1	1	158.386	scl068054.1_70-S	NM_026535.1	4632419J12Rik	scl068054.1_70
Psmd8	84.9	1177.1	0.9994	1	371.334	scl0057296.1_256-S	NM_026545.1	6720456J22Rik;C76433	scl0057296.1_256

## Sheet: C
Upregulated genes (Diff_Score≥13/P≤0.05) in spleen of Mcph1gt/gt mice.
Gene	Signal intensity (3 wild type mice)	Signal intensity (3 Mcph1gt/gt mice)	Detection rate (3 wild type mice)	Detection rate (3 Mcph1gt/gt mice)	Diff_Score (Mcph1gt/gt / wild type)	Target ID	Accession	Synonyms	Transcript ID
1110011K10Rik	633.1	843.7	1	1	13.0073	scl36121.3_28-S	NM_170777.3	MGC29916;MGC37411;MGC4549	scl36121.3_28
Phf6	170.8	223	1	1	13.0089	scl0002988.1_2158-S	NM_027642.1	2700007B13Rik;4931428F02Rik;mKIAA1823	scl0002988.1_2158
Pycrl	275.8	345.3	1	1	13.014	scl066194.1_36-S	NM_025412	1110058B13Rik	scl066194.1_36
Phkb	-1.2	9.9	0.4941	0.9283	13.0199	scl33551.36_1-S	NM_199446.1	MGC62514	scl33551.36_1
Stx8	700.1	856.1	1	1	13.023	scl0055943.1_284-S	NM_018768.1	0610007H08Rik;1110002H11Rik;4930571E13Rik;CARB	scl0055943.1_284
Whsc2	463	577.2	1	1	13.0232	scl0024116.2_231-S	NM_011914.1	NELFA;Whsc2h	scl0024116.2_231
Slc23a3	15.5	44.5	0.9626	0.9956	13.0274	scl022626.1_322-S	NM_194333.2	SVCT3;Yspl1	scl022626.1_322
Sfrs16	58.7	159.8	0.9963	1	13.0341	scl31678.22.1_32-S	NM_016680	Clasp;Swap2	scl31678.22.1_32
Shmt2	71.5	103.4	0.9975	0.9994	13.0375	scl37379.15_307-S	NM_028230.2	2700043D08Rik	scl37379.15_307
Chchd1	2267.1	3173.8	1	1	13.0375	scl46593.3.1_27-S	NM_025366.1		scl46593.3.1_27
A330021D07Rik	36	59.7	0.9913	0.9969	13.0445	ri|A330021D07|PX00130B03|AK039311|1319-S	AK039311		ri|A330021D07|PX00130B03|AK039311|1319
M6pr	83.3	119.2	0.9988	0.9994	13.0469	scl0001098.1_18-S	NM_010749.4	CD-MPR;Mpr46	scl0001098.1_18
Cyp4f14	6.7	33.9	0.8665	0.9925	13.0533	scl064385.1_89-S	NM_022434.1	1300014O15Rik	scl064385.1_89
Ide	247.3	306	1	1	13.0559	scl0015925.2_2-S	NM_031156.1	1300012G03Rik;4833415K22Rik	scl0015925.2_2
Cpt2	132.3	167.9	0.9994	1	13.0589	scl24019.5_109-S	NM_009949	CPTII	scl24019.5_109
Igk-C	14511.1	17661.7	1	1	13.0607	scl0016071.1_62-S	XM_132633.4		scl0016071.1_62
Pgls	2702.9	3294	1	1	13.0831	scl33694.4.1_117-S	NM_025396.1	1110030K05Rik;Plgs	scl33694.4.1_117
Capzb	2239.5	2896.4	1	1	13.0936	scl0002845.1_3-S	NM_009798.1	1700120C01Rik;Cappb1;CPB1;CPB2;CPbeat2;CPbeta1;CPbeta2	scl0002845.1_3
Ubap2	1753.1	2441.7	1	1	13.0979	scl24427.29_125-S	NM_026872.1	1190005K07Rik;mKIAA1491	scl24427.29_125
2010003J03Rik	360.6	516	1	1	13.0991	scl069860.1_67-S	XM_129120		scl069860.1_67
5730466P16Rik	984.8	1210.4	1	1	13.1105	scl40141.3_333-S	NM_173453.1	5730466P16;AA409091	scl40141.3_333
Rps7	11054.3	13462.4	1	1	13.1141	scl020115.2_55-S	NM_011300	S7	scl020115.2_55
Rabl2a	119.1	165.9	0.9994	1	13.1161	scl068708.1_138-S	NM_026817.1	1110031N17Rik	scl068708.1_138
Acas2	153.7	295.6	0.9994	1	13.1257	scl060525.18_152-S	NM_019811.2	1110017C11Rik;ACAS;Acas1;AceCS1;Acs1	scl060525.18_152
D6Ertd365e	184	229.5	1	1	13.1282	scl0387524.6_16-S	NM_199143.1		scl0387524.6_16
Gm169	150.7	189.2	0.9994	1	13.1298	scl0212508.11_34-S	NM_199301	MGC28365	scl0212508.11_34
1700021I09Rik	115.7	162.4	0.9994	1	13.136	scl34362.7_18-S	NM_026277.1	ART-4;Nob1;Nob1p	scl34362.7_18
2610024E20Rik	965.8	1258.6	1	1	13.1424	scl51547.21_511-S	NM_146084		scl51547.21_511
Kif3c	93.5	124.8	0.9994	1	13.1435	scl016570.2_240-S	NM_008445.1		scl016570.2_240
0910001A06Rik	54.7	74.1	0.9963	0.9994	13.1437	scl0002560.1_12-S	NM_144846.2		scl0002560.1_12
Stard3nl	197.6	251.6	1	1	13.1453	scl44251.7.1_3-S	NM_024270.1	0610035N01Rik;6530409L22Rik;MENTHO	scl44251.7.1_3
Fpr-rs2	598.2	1581.8	1	1	13.1455	scl014289.2_177-S	NM_008039.1	E330010I07Rik	scl014289.2_177
Rdbp	733.9	919.8	1	1	13.1458	scl50808.8.1_29-S	NM_138580	D17H6S45;NELF-E;RD	scl50808.8.1_29
Gpr23	7.1	50.6	0.8765	0.9963	13.147	scl078134.3_260-S	NM_175271	5730485F04Rik	scl078134.3_260
Rab8b	1744.3	2292.2	1	1	13.15	scl35677.8_443-S	NM_173413.2	5930437D16;D330025I23Rik	scl35677.8_443
Smarcd2	2433.4	2968	1	1	13.1522	scl083796.1_300-S	NM_031878.1	Baf60b	scl083796.1_300
Fgd6	1	12.7	0.6313	0.952	13.164	scl38536.23.1_129-S	NM_053072	Etohd4;ZFYVE24	scl38536.23.1_129
Cyp2a5	21.3	73.3	0.9813	0.9994	13.1729	scl0013087.1_70-S	NM_007812.1	Coh;Cyp15a2	scl0013087.1_70
4633402N23Rik	320.5	419.8	1	1	13.1809	scl37368.2_193-S	XM_125946		scl37368.2_193
Ruvbl1	506.7	689.8	1	1	13.1841	scl0056505.2_24-S	NM_019685.1	2510009G06Rik;Pontin52;Tip49a	scl0056505.2_24
1110002D22Rik	551.9	686.3	1	1	13.1855	ri|1110002D22|R000015E18|AK003285|794-S	AK003285		ri|1110002D22|R000015E18|AK003285|794
Cd226	14.8	30.9	0.9576	0.9913	13.1863	scl00225825.2_60-S	NM_178687.1		scl00225825.2_60
Btbd12	442.2	637.9	1	1	13.1989	scl48821.4_3-S	NM_177472.3		scl48821.4_3
Cwf19l1	109.9	140	0.9994	1	13.2122	scl52450.19_488-S	XM_129328		scl52450.19_488
Timm17a	773.9	1169.4	1	1	13.2138	scl16257.7.73_24-S	NM_011590.1	17kDa;mTim17a	scl16257.7.73_24
BC065123	276.4	375.9	1	1	13.2242	scl42456.11_22-S	NM_172576.1		scl42456.11_22
Slc25a26	73.2	96.1	0.9975	0.9994	13.2454	scl067582.10_107-S	NM_026255.2	4930433D19Rik;4933433F13Rik;D6Bwg0781e;Slc25a6	scl067582.10_107
Eif4a1	381.8	499.4	1	1	13.2455	scl013681.1_1-S	NM_144958.2	BM-010;Ddx2a;Eif4	scl013681.1_1
Rhot1	624	765.3	1	1	13.2506	scl059040.12_45-S	NM_021536.5	2210403N23Rik;AA415293;Arht1;FLJ11040;Miro1	scl059040.12_45
Ilf2	760	988.8	1	1	13.2534	scl067781.14_22-S	NM_026374	6230405A16Rik	scl067781.14_22
Sh3glb2	326.4	402.9	1	1	13.2707	scl19472.10_43-S	NM_139302.1	mKIAA1848	scl19472.10_43
Psmd7	594.8	895.8	1	1	13.2714	scl34359.7_33-S	NM_010817.1	Mov-34;Mov34	scl34359.7_33
Rdx	76.4	110.9	0.9975	0.9994	13.2842	scl019684.7_10-S	NM_009041		scl019684.7_10
A830030H10Rik	-0.3	212.6	0.5558	1	13.2876	ri|A830030H10|PX00154P16|AK080627|893-S	AK080627		ri|A830030H10|PX00154P16|AK080627|893
Prkcb	1077.7	1541.8	1	1	13.289	scl018751.17_49-S	NM_008855.1	Pkcb	scl018751.17_49
1810020D17Rik	256.7	318.3	1	1	13.2912	scl31031.8.1_28-S	NM_183251.2	1810037D19Rik	scl31031.8.1_28
Cse1l	121.1	177.1	0.9994	1	13.307	scl0003305.1_130-S	NM_023565.1	2610100P18Rik;Capts;Cas;Xpo2	scl0003305.1_130
Nqo2	84.8	125.4	0.9988	1	13.3115	scl0003622.1_15-S	NM_020282.2	NMO2;Nmor2;Ox-2;Ox2	scl0003622.1_15
Rpl7	6038.6	7370.5	1	1	13.3152	scl019989.6_6-S	NM_011291	Rpl7a;Surf-3	scl019989.6_6
Hnrpc	5212.4	6425.4	1	1	13.3246	scl015381.1_4-S	NM_016884.1	D14Wsu171e;hnrnp-C;Hnrnpc;hnRNPC1;hnRNPC2;Hnrpc1;Hnrpc2	scl015381.1_4
Ppm1b	29	51.1	0.9894	0.9963	13.3263	scl0019043.1_76-S	NM_011151.1	PP2CB	scl0019043.1_76
9830109N13Rik	97.2	124.9	0.9994	1	13.3369	scl0100609.9_1-S	NM_145414.1	AI326939;Wbscr20	scl0100609.9_1
Sepx1	122.7	162.9	0.9994	1	13.3521	scl51004.4_55-S	NM_013759.1		scl51004.4_55
BC013491	34.5	50.5	0.9906	0.9963	13.3537	GI_38086626-S	XM_133435.2		GI_38086626
C77032	69.5	93.5	0.9975	0.9994	13.3558	scl000383.1_1-S	NM_153547.2	MGC46970;Ns	scl000383.1_1
Dph2l2	185.6	232	1	1	13.36	scl23928.4.1_17-S	NM_026344.2	9130020C19Rik	scl23928.4.1_17
1810059A23Rik	68.6	90.8	0.9975	0.9994	13.3655	scl000856.1_265-S	NM_178051.3	4933412H03Rik	scl000856.1_265
Thbs1	-5.2	6.1	0.1784	0.8565	13.3658	scl0021825.1_197-S	NM_011580.1	tbsp1;Thbs-1;TSP-1;TSP1	scl0021825.1_197
3930401E15Rik	152.4	218.6	0.9994	1	13.3678	ri|3930401E15|PX00010D02|AK076210|1842-S	AK076210		ri|3930401E15|PX00010D02|AK076210|1842
Ap3s2	126.2	160	0.9994	1	13.3681	scl31144.7_115-S	NM_009682.2	[s]3B	scl31144.7_115
Mrps26	153.5	193.3	0.9994	1	13.3815	scl099045.1_16-S	NM_207207.1		scl099045.1_16
4933426L22Rik	224.2	286	1	1	13.3914	scl15880.9_346-S			scl15880.9_346
2410001E19Rik	461.7	568.4	1	1	13.3918	scl37132.7_178-S	XM_134644.2		scl37132.7_178
Vtn	50.9	161.6	0.9963	1	13.4025	scl41201.7.1_21-S	NM_011707.1	Vn	scl41201.7.1_21
Spn	45.8	81	0.995	0.9994	13.4061	scl0020737.2_2-S	NM_009259.1	A630014B01Rik;Cd43;Ly-48	scl0020737.2_2
Mapk9	511.6	629.4	1	1	13.4066	scl41621.13_164-S	NM_207692.1	JNK2;p54aSAPK;Prkm9	scl41621.13_164
Abcd3	34	49.9	0.9906	0.9956	13.4107	scl0019299.2_231-S	NM_008991.1	PMP68;PMP70;Pxmp1	scl0019299.2_231
Ssr4	1092.7	1392.5	1	1	13.4131	scl54843.2_132-S	NM_009279	Trap	scl54843.2_132
Fpgs	32.4	54.9	0.9906	0.9969	13.4177	scl0003230.1_8-S	NM_010236.1		scl0003230.1_8
Tceb2	675	984.5	1	1	13.4204	scl50229.6.1_24-S	NM_026305.1	0610040H15Rik	scl50229.6.1_24
Hbb-b1	123.2	413.1	0.9994	1	13.4384	scl0015129.1_300-S	NM_008220.2		scl0015129.1_300
Sumo3	695.2	876.3	1	1	13.4384	scl020610.4_145-S	NM_019929		scl020610.4_145
A530062K18Rik	96.1	133.7	0.9994	1	13.4491	ri|A530062K18|PX00141N22|AK041022|2792-S	AK041022		ri|A530062K18|PX00141N22|AK041022|2792
Nckap1	37.2	59.1	0.9931	0.9969	13.4519	scl0050884.1_187-S	NM_016965.1	H19;Hem-2;mh19;Nap1	scl0050884.1_187
1300006C19Rik	75.4	106.7	0.9975	0.9994	13.4531	ri|1300006C19|R000011G13|AK018758|2709-S	AK018758		ri|1300006C19|R000011G13|AK018758|2709
Fga	142	681.1	0.9994	1	13.4589	scl0001939.1_45-S	NM_010196.1	Fib	scl0001939.1_45
4930579G24Rik	69.7	112.1	0.9975	0.9994	13.4779	scl075939.2_195-S	XM_485257		scl075939.2_195
LOC384146	773.2	1269	1	1	13.4785	GI_38079525-S	XM_357448.1		GI_38079525
BC008103	77.4	103.1	0.9981	0.9994	13.4798	scl21957.9.1_12-S	NM_144898.1	MGC11722	scl21957.9.1_12
Rapgef1	2600.3	3217.3	1	1	13.4898	scl21113.26_436-S	NM_054050	4932418O06Rik;C3G;Grf2	scl21113.26_436
Atp5a1	11.4	24.8	0.9357	0.9888	13.4942	scl51737.13.1_28-S	NM_007505.1	Atpm	scl51737.13.1_28
Bag4	195.1	260.4	1	1	13.5	scl0067384.1_276-S	NM_026121.1	2410112I15Rik;SODD	scl0067384.1_276
Acaa2	511.3	787.4	1	1	13.5055	scl51768.11.1_9-S	NM_177470.2	0610011L04Rik;D18Ertd240e	scl51768.11.1_9
Apoa2	1042.5	4279.4	1	1	13.5064	scl011807.2_4-S	NM_013474.1	Alp-2;Apoa-2;ApoA-II;Hdl-1	scl011807.2_4
Mrpl33	1472.4	1949.2	1	1	13.5303	scl0004113.1_27-S	NM_025796.1	0610009M10Rik	scl0004113.1_27
Btbd14b	17.2	31.9	0.9688	0.9919	13.5321	scl0066830.2_105-S	NM_025788.2	2010001H03Rik;4930511N13Rik;Nac1	scl0066830.2_105
Runx1	62.1	89.2	0.9963	0.9994	13.5347	scl0012394.1_257-S	NM_009821.1	AML1;Cbfa2;Pebp2a2;Pebpa2b	scl0012394.1_257
Mmp3	30.4	86.4	0.9894	0.9994	13.5405	scl37307.8.1_29-S	NM_010809.1	SLN-1;SLN1;Stmy1;Str1	scl37307.8.1_29
2310065K24Rik	413.7	510.6	1	1	13.5433	scl0102122.1_65-S	NM_028221.2	AI596259	scl0102122.1_65
LOC333744	140.6	186.1	0.9994	1	13.5448	GI_38083108-S	XM_289803.2		GI_38083108
Dpp8	197.4	306	1	1	13.5539	scl36817.19_229-S	NM_028906.2	4932434F09Rik	scl36817.19_229
2210021A15Rik	377.4	544.1	1	1	13.561	scl0002723.1_35-S	NM_020000.1	AB041805;MNCb-2386	scl0002723.1_35
Ndufa9	1113.4	1385.2	1	1	13.5753	scl066108.3_20-S	NM_025358.1	1010001N11Rik	scl066108.3_20
Uxt	754.3	1015.5	1	1	13.5761	scl022294.1_13-S	NM_013840.2	0910002B17Rik	scl022294.1_13
Gdi3	-3.8	10.4	0.277	0.9308	13.5844	scl0003746.1_25-S	NM_008112.2	GDI-B;GDIB	scl0003746.1_25
Tceb2	411.5	648.7	1	1	13.5937	scl0067673.1_322-S	NM_026305.1	0610040H15Rik	scl0067673.1_322
Cryzl1	292.2	362.6	1	1	13.6073	scl0001778.1_28-S	NM_133679.1	2210407J23Rik;2410006O11Rik	scl0001778.1_28
LOC195372	9.6	22.1	0.917	0.9863	13.6143	GI_28511633-S	XM_111735.3		GI_28511633
2610024E20Rik	290.5	418.4	1	1	13.6229	scl00002.1_228_REVCOMP-S	NM_146084.1		scl00002.1_228_REVCOMP
Top1	209.7	284.5	1	1	13.6235	scl021969.20_26-S	NM_009408.1	Top-1	scl021969.20_26
LOC208092	295.9	367.2	1	1	13.63	GI_28514930-S	XM_126613.3		GI_28514930
4930522P08Rik	29.5	45.9	0.9894	0.9956	13.6332	scl33726.1.24_66-S			scl33726.1.24_66
Eif1ay	124.5	198.2	0.9994	1	13.6447	scl54514.7_209-S	NM_025437	1500010B24Rik	scl54514.7_209
2400003N08Rik	2174.8	2665.9	1	1	13.6463	scl26137.12_266-S	NM_178622.3		scl26137.12_266
Hgfac	8.2	39.2	0.8996	0.9944	13.6472	scl27904.14.1_131-S	NM_019447.1	HGFA	scl27904.14.1_131
Commd7	170	213.7	1	1	13.6485	scl0099311.1_306-S	NM_133850.1	2310010I22Rik;AW060956;mU3	scl0099311.1_306
AA407809	267.6	478.4	1	1	13.6491	scl15984.9.1_5-S	NM_030724.1	Uck2	scl15984.9.1_5
2500001D14Rik	18.4	67.4	0.9757	0.9988	13.6636	ri|2500001D14|ZX00082C08|AK010841|817-S	AK010841		ri|2500001D14|ZX00082C08|AK010841|817
2810428I15Rik	134.4	198.2	0.9994	1	13.6642	scl34701.2.1_7-S	XM_147329.1		scl34701.2.1_7
Akt3	19.5	33.4	0.9775	0.9925	13.6666	scl0001014.1_96-S	NM_011785.2		scl0001014.1_96
Hspca	22.7	51.1	0.9838	0.9963	13.6715	scl015519.1_32-S	NM_010480	86kDa;89kDa;hsp4;Hsp86-1;Hsp89;Hsp90	scl015519.1_32
Atad3a	688.8	989.5	1	1	13.6761	scl0108888.1_320-S	NM_179203.1	2400004H09Rik;Tob3	scl0108888.1_320
Zdhhc21	48.8	67.5	0.9963	0.9981	13.6877	scl24175.12_516-S	NM_026647.2	9130404H11Rik	scl24175.12_516
Uble1a	2427.8	2977	1	1	13.699	scl0056459.2_315-S	NM_019748.1	2400010M20Rik;2610044L12Rik;AOS1;D7Ertd177e;HSPC140;SAE1;Sua1	scl0056459.2_315
9430034D17Rik	75.2	105.1	0.9975	0.9994	13.7073	scl0077286.1_137-S	NM_029891.1		scl0077286.1_137
1500032D16Rik	2012.5	2468.9	1	1	13.7138	scl50873.6.1_76-S	NM_030087.1		scl50873.6.1_76
BC006933	260.1	351.7	1	1	13.7161	scl0217946.10_177-S	NM_146040.1	MGC11998	scl0217946.10_177
Cpsf1	1770.7	2187.5	1	1	13.7327	scl47038.26.1_10-S	NM_053193		scl47038.26.1_10
Tex2	59.8	80.7	0.9963	0.9994	13.7335	scl0021763.1_228-S	NM_198292.2	4930568E07Rik;Def-5;mKIAA1738;Taz4	scl0021763.1_228
Arhgap18	49.5	80	0.9963	0.9994	13.7456	scl39065.17_337-S	NM_176837.1	4833419J07Rik	scl39065.17_337
Lrp10	4030.2	4941.2	1	1	13.7463	scl46303.7_279-S	NM_022993.2	Lrp9	scl46303.7_279
Slamf9	207.3	399.9	1	1	13.7503	scl17201.4.1_50-S	NM_029612.2	2310026I04Rik;AI462096;CD2F-10;Cd2f10;CD84-H1;SF2001	scl17201.4.1_50
Sqle	260.7	433.3	1	1	13.7543	scl47884.11.17_1-S	NM_009270.2		scl47884.11.17_1
Itih1	14.6	115.3	0.9595	0.9994	13.7562	scl45771.22.1_206-S	NM_008406.1	Intin1;Itih-1	scl45771.22.1_206
6720460F02Rik	22.8	38.2	0.9838	0.9944	13.7618	scl0109212.6_211-S	NM_144526.2	2610008F03Rik	scl0109212.6_211
Statip1	63.5	90.7	0.9963	0.9994	13.7728	scl0002239.1_15-S	NM_021448.1	Elp2;StIP1	scl0002239.1_15
Mrpl36	41.9	72	0.9944	0.9994	13.7869	scl44635.2.1_29-S	NM_053163.1		scl44635.2.1_29
Nedd1	204.3	324.3	1	1	13.8008	scl37604.17_345-S	NM_008682		scl37604.17_345
Psmb2	1854.5	2398.3	1	1	13.8167	scl24957.6.1_12-S	NM_011970.2	C7-I;D4Wsu33e	scl24957.6.1_12
Psmb3	2208.1	3057.1	1	1	13.8169	scl026446.4_108-S	NM_011971.2	C10-II	scl026446.4_108
Ovca2	291.6	362.7	1	1	13.8214	scl0246257.1_125-S	NM_027136.2	9030414M07Rik	scl0246257.1_125
4930579A11Rik	49.1	73.5	0.9963	0.9994	13.8236	scl0001304.1_8-S	NM_029478.2		scl0001304.1_8
2310042G06Rik	974.6	1587.7	1	1	13.8268	scl066390.1_295-S	NM_025531.2		scl066390.1_295
4933427L07Rik	899.7	1243	1	1	13.8348	scl51764.24.1_222-S	NM_027727.1	1810041M12Rik;C030019K18Rik;MGC18957	scl51764.24.1_222
Sra1	242.7	303	1	1	13.8467	scl0002171.1_4-S	NM_025291.1	SRA;Strra1	scl0002171.1_4
2610011C24Rik	9.1	22.4	0.9077	0.9863	13.8497	ri|2610011C24|ZX00045A05|AK011373|2113-S	AK011373		ri|2610011C24|ZX00045A05|AK011373|2113
1810020C19Rik	294.5	366.4	1	1	13.8502	scl18972.12.1_41-S	XM_130317.5		scl18972.12.1_41
D930035B09Rik	4.2	18	0.7867	0.98	13.8605	scl24859.6.20_8-S	NM_172876.1	D930035B09	scl24859.6.20_8
Fadd	114.8	147	0.9994	1	13.8617	scl0014082.2_318-S	NM_010175.2	Mort1/FADD	scl0014082.2_318
1810009K13Rik	43.1	61.5	0.995	0.9975	13.8669	scl066275.3_306-S	NM_025462.1		scl066275.3_306
Gas5	2403.5	3348	1	1	13.8725	scl0014455.1_87-S	NM_013525.1	Gas-5	scl0014455.1_87
Snap23	171.3	234.4	1	1	13.874	scl0003245.1_6-S	NM_009222.2	23kDa;SNAP-23;Sndt;Syndet	scl0003245.1_6
Wars	29.7	56.3	0.9894	0.9969	13.8792	scl0002319.1_93-S	NM_011710.2	WRS	scl0002319.1_93
Psma2	4537.8	5934.8	1	1	13.8838	scl019166.8_87-S	NM_008944.1	Lmpc3	scl019166.8_87
3110031B13Rik	155.3	196.3	0.9994	1	13.8888	scl44433.6_482-S	NM_026075	AI462702;AW121048	scl44433.6_482
Gp1ba	60.8	146.9	0.9963	1	13.8906	scl14069.2.1_18-S	NM_010326.1		scl14069.2.1_18
Gpt1	429.9	543.8	1	1	13.8956	scl47787.2_58-S	NM_182805.1	1300007J06Rik;2310022B03Rik;Gpt-1	scl47787.2_58
Gstt1	166	215.9	1	1	13.9101	scl37811.6.1_5-S	NM_008185.2	Gstt1-1	scl37811.6.1_5
8430410K20Rik	481.7	595.9	1	1	13.911	scl37319.3_438-S	NM_145609.1		scl37319.3_438
Asgr1	0.6	45.5	0.6107	0.9956	13.9151	scl41345.9.1_11-S	NM_009714.1	ASGPR1;Asgr;Asgr-1	scl41345.9.1_11
Nif3l1	143.9	191	0.9994	1	13.9241	scl17933.6.96_12-S	NM_022988.2	1110030G24Rik	scl17933.6.96_12
Adh5	103.5	143.5	0.9994	1	13.9351	scl22543.4.4_13-S	NM_007410.2	Adh-5;Adh3;GSNOR	scl22543.4.4_13
Cope	991.8	1359.6	1	1	13.9397	scl059042.1_5-S	NM_021538.1	1110005D17Rik;Cope1	scl059042.1_5
Thrap6	757.4	1011.6	1	1	13.9425	scl069790.3_16-S	NM_027212.1	1810038N03Rik;2510044J04Rik;TRAP25	scl069790.3_16
1200013B22Rik	541.9	670	1	1	13.9504	scl17480.9.1_6-S	NM_028778.2	mKIAA0537;Snark	scl17480.9.1_6
Grpel2	179.9	226.5	1	1	13.9517	scl51356.6_394-S	NM_021296	mt-GrpE#2;mt-Grpel2	scl51356.6_394
Rassf1	84.8	120.7	0.9988	0.9994	13.9605	scl0003567.1_200-S	NM_019713	123F2;NORE2A;Rassf1A;Rassf1B;Rassf1C;RDA32;REH3P21	scl0003567.1_200
Sh3bgrl3	2150.1	3389	1	1	13.9667	scl23697.3.1_58-S	NM_080559.1	1110004L05Rik	scl23697.3.1_58
Itm2b	8635.7	11077.6	1	1	13.9712	scl016432.2_9-S	NM_008410.1	D14Sel6;E25BMM	scl016432.2_9
1110031I02Rik	128.5	163.9	0.9994	1	13.9754	scl39207.10.1_15-S	NM_025402.1		scl39207.10.1_15
Mrps35	210.5	290.3	1	1	13.9818	scl0001111.1_19-S	NM_145573	MDSO23;MGC28446;MRP-S28;MRPS28	scl0001111.1_19
1700014P03Rik	109.7	147.6	0.9994	1	13.9844	scl30983.9.1_23-S	NM_153527.2	Tsarg	scl30983.9.1_23
Tmem20	68.1	116.2	0.9975	0.9994	13.9892	scl53158.2_336-S	NM_175507.2	D330039I19Rik	scl53158.2_336
Atp1a1	3735.9	4728.1	1	1	13.9935	scl21752.24.8_3-S	NM_144900.1	Atpa-1;MGC38419	scl21752.24.8_3
2810437L13Rik	322.9	437.1	1	1	13.9985	scl0068033.1_52-S	NM_197980.1		scl0068033.1_52
LOC233307	1.3	32.7	0.6482	0.9919	13.9992	GI_38078099-S	XM_133529.2		GI_38078099
Ppp3cb	1342.8	1653.5	1	1	14.0042	scl0019056.2_142-S	NM_008914.1	1110063J16Rik;Calnb;CnAbeta	scl0019056.2_142
Sap30	522.3	838.4	1	1	14.0152	scl34795.4.1_9-S	NM_021788.1	30kDa;mSin3a	scl34795.4.1_9
LOC384790	424.1	525.8	1	1	14.0176	GI_38089162-S	XM_357867.1		GI_38089162
BC004012	1164.1	1445.1	1	1	14.0189	scl24620.16_177-S	NM_138671	MGC7589	scl24620.16_177
D1Wsu40e	260.6	328.4	1	1	14.022	scl18092.6_1-S	NM_178601.2	Imp4	scl18092.6_1
Pdcd8	8.4	24.2	0.8996	0.9881	14.0366	scl0002881.1_47-S	NM_012019.2	AIF;Hq;mAIF;MGC5706	scl0002881.1_47
Nbn	132.1	202.3	0.9994	1	14.037	scl0002700.1_45-S	NM_013752	Nbs1	scl0002700.1_45
Ncbp2	109	145.7	0.9994	1	14.0395	scl068092.4_14-S	NM_026554.2	20kDa;5930413E18Rik	scl068092.4_14
Prnp	2457.4	3201.6	1	1	14.0442	scl019122.2_199-S	NM_011170.1	CD230;Prn-i;Prn-p;PrP;PrP<C>;PrPC;PrPSc;Sinc	scl019122.2_199
Smyd2	81.7	132.5	0.9988	1	14.0442	scl15773.8_26-S	NM_026796.1	1110020E07Rik;4930402C15;Zmynd14	scl15773.8_26
Zdhhc12	546.2	675.8	1	1	14.0497	scl19480.4_1-S	NM_025428.1	1190004A01Rik	scl19480.4_1
D19Ertd737e	54.8	75	0.9963	0.9994	14.0548	scl000485.1_77-S	NM_029648.3	2310065H12Rik;2610015K05Rik	scl000485.1_77
6330407G11Rik	177.3	223.5	1	1	14.0564	scl068050.2_0-S	XM_124343.1		scl068050.2_0
Ppil3	93.5	148.4	0.9994	1	14.0713	scl0001010.1_64-S	NM_027351	2310076N22Rik;2510026K04Rik;Cyp10l	scl0001010.1_64
Cd69	25.2	42.4	0.9863	0.9956	14.0764	scl28341.3_2-S	XM_132882.1		scl28341.3_2
Polr2e	2375.6	2923.9	1	1	14.0807	scl37743.3.1_54-S	XM_282920.1		scl37743.3.1_54
Scp2	2202.2	2949.4	1	1	14.0834	scl0002716.1_33-S	NM_011327.1	ns-LTP;NSL-TP;SCP-2;SCPx	scl0002716.1_33
Vamp4	147.1	186.8	0.9994	1	14.0987	scl000897.1_256-S	AF061516	D1Ertd147e	scl000897.1_256
Anxa3	429	532.3	1	1	14.104	scl27561.16.206_36-S	NM_013470.1	Anx3	scl27561.16.206_36
Snx17	2541.8	3129.3	1	1	14.1201	scl27959.12_30-S	NM_153680.1	5830447M19Rik;D5Ertd260e;mKIAA0064	scl27959.12_30
LOC329750	357.5	505.6	1	1	14.1244	GI_38074365-S	XM_287286.2		GI_38074365
1810014L12Rik	182.5	296.2	1	1	14.1281	scl069071.1_105-S	NM_133706.1		scl069071.1_105
Tbl1x	109.2	143.2	0.9994	1	14.1364	scl0021372.2_85-S	NM_020601.1	5330429M20;Tbl1	scl0021372.2_85
5730436H21Rik	224.2	319.5	1	1	14.1491	scl0107071.9_36-S	NM_134139.1	AA407588	scl0107071.9_36
LOC382215	22.5	37.2	0.9832	0.9944	14.1537	GI_38086320-S	XM_356328.1		GI_38086320
9930022F21Rik	32	101.6	0.9906	0.9994	14.1595	ri|9930022F21|PX00120E19|AK036897|4230-S	AK036897		ri|9930022F21|PX00120E19|AK036897|4230
Ccnc	87.5	135	0.9994	1	14.1667	scl25632.14_24-S	NM_016746.1	CG1C	scl25632.14_24
2600001B17Rik	38.6	55.9	0.9938	0.9969	14.1697	scl0268490.4_62-S	NM_172947.1		scl0268490.4_62
3110037I16Rik	57.7	78.6	0.9963	0.9994	14.1761	scl23881.4_371-S	NM_028457.1		scl23881.4_371
Alg5	1015.5	1296.5	1	1	14.1788	scl23193.10.1_8-S	NM_025442.1	1500026A19Rik;2600005J22	scl23193.10.1_8
Atp6ap2	175.3	278.1	1	1	14.1813	scl0002998.1_67-S	NM_027439	5730403E06Rik;APT6M8-9;Atp6ip2;ATP6M8-9;M8-9	scl0002998.1_67
Trappc3	819.8	1013.3	1	1	14.1978	scl027096.1_199-S	NM_013718.2	1110058K12Rik;Bet3	scl027096.1_199
Farsla	85.6	148.4	0.9988	1	14.2001	scl0066590.2_213-S	NM_025648.1	0610012A19Rik	scl0066590.2_213
Xpnpep1	72	126.3	0.9975	1	14.2015	scl52369.13.4_3-S	NM_133216.2	D230045I08Rik	scl52369.13.4_3
Sfrs9	1153	1423.2	1	1	14.2027	scl27364.5.1_30-S	NM_025573.2	25kDa;2610029M16Rik;SRp30c	scl27364.5.1_30
1300013F15Rik	-1.7	19.7	0.461	0.9813	14.2071	scl15810.7.1_1-S	XM_129663.1		scl15810.7.1_1
Abcf2	38.5	66.8	0.9938	0.9981	14.2157	scl0027407.2_308-S	NM_013853.1	0710005O05Rik;D13Ertd614e;E430001O06	scl0027407.2_308
Tada3l	316.8	395.1	1	1	14.2348	scl00101206.2_281-S	NM_133932.1	1110004B19Rik;ADA3;AI987856	scl00101206.2_281
Vrk1	5.2	21.8	0.8303	0.9863	14.245	scl0002276.1_2-S	NM_011705.2	51PK	scl0002276.1_2
Crebl1	1025.9	1318.7	1	1	14.2576	scl50814.22.1_1-S	NM_017406.2	Creb-rp	scl50814.22.1_1
Mitc1	214.6	269.7	1	1	14.2652	scl0075901.2_135-S	NM_133761.2	1110066A22Rik;4930568L04Rik;D14Ertd817e;SMIF	scl0075901.2_135
Trappc4	86	119.3	0.9988	0.9994	14.2672	scl35956.2.1_28-S	NM_021789.2	1500017G03Rik;HSPC172;PTD009;Sbd;Sbdn;Sdcbp2;TRS23	scl35956.2.1_28
Nipsnap1	210.1	284.3	1	1	14.2703	scl41882.13_532-S	NM_008698.1		scl41882.13_532
Rnase4	37.5	131	0.9931	1	14.2844	scl000323.1_2-S	NM_201239		scl000323.1_2
B3galt6	24.6	67.2	0.9857	0.9981	14.2845	scl00117592.2_262-S	NM_080445.2	GalTII	scl00117592.2_262
2900010M23Rik	833.8	1142.4	1	1	14.2849	scl067267.4_0-S	NM_026063.1		scl067267.4_0
Mrps10	110.8	170.6	0.9994	1	14.2902	scl50660.8.1_1-S	NM_183086.1	1110038B19Rik;Rpms10	scl50660.8.1_1
V1ra6	-1.1	13.1	0.5016	0.9532	14.2923	scl839.1.1_80-S	NM_053221.1		scl839.1.1_80
Vapb	30.6	53.3	0.9906	0.9969	14.3031	scl0056491.1_59-S	NM_019806.3	D2Abb2e;Vamp33b;VAP33b	scl0056491.1_59
2310050B20Rik	134	184.1	0.9994	1	14.3083	scl37403.6.1_51-S	NM_025537.2	9430024O13Rik	scl37403.6.1_51
Insig2	33.4	88.4	0.9906	0.9994	14.3086	scl000986.1_622-S	NM_133748.1	2900053I11Rik;C730043J18Rik;Insig-2	scl000986.1_622
Atf4	50.4	152.8	0.9963	1	14.31	scl0002504.1_31-S	NM_009716	Atf-4;C/ATF;CREB2;TAXREB67	scl0002504.1_31
9030624J02Rik	41.7	59.7	0.9944	0.9969	14.3157	scl32142.34_423-S	NM_027815	2610029J22Rik	scl32142.34_423
1110014N23Rik	99.5	134	0.9994	1	14.3164	scl000503.1_20-S	XM_283543.2		scl000503.1_20
1500011K16Rik	112.1	183.1	0.9994	1	14.3219	scl067885.2_20-S	NM_175125.2		scl067885.2_20
Myo1g	1408.8	1789.1	1	1	14.3279	scl40536.24.1_162-S	NM_178440.2	E430002D17Rik	scl40536.24.1_162
LOC217066	4	16.5	0.7817	0.975	14.3426	GI_20912727-S	XM_126785.1		GI_20912727
E430031D18Rik	324.8	431.5	1	1	14.344	ri|E430031D18|PX00101L19|AK088915|864-S	AK088915		ri|E430031D18|PX00101L19|AK088915|864
Eps8	18.6	33.8	0.9757	0.9931	14.3593	scl28264.25.1_26-S	NM_007945.1		scl28264.25.1_26
Arfgap1	21.1	37.8	0.9794	0.9944	14.3675	scl0003246.1_27-S	NM_145760.2	Arf1gap	scl0003246.1_27
Dyt1	83.2	112.2	0.9988	0.9994	14.3676	scl0003308.1_58-S	NM_144884.1	DQ2;MGC18883;Tor1a;torsinA	scl0003308.1_58
Gyk	1.9	21.5	0.6918	0.9863	14.3714	scl0014933.2_154-S	NM_008194	GK	scl0014933.2_154
Crry	68.9	92.3	0.9975	0.9994	14.372	scl0012946.2_3-S	NM_013499.1	Mcp;mCRY	scl0012946.2_3
Fbxo33	165.6	224.4	1	1	14.3733	GI_85701673-S	NM_001033156.1	5730501N20Rik;AI642135	GI_85701673
1700029F09Rik	304.2	490.3	1	1	14.3819	scl075623.2_116-S	XM_355303.1		scl075623.2_116
2610024E20Rik	287.3	443.5	1	1	14.3845	scl00225358.2_258-S	NM_146084.1		scl00225358.2_258
Col18a1	333.4	423.9	1	1	14.399	scl37787.43_431-S	NM_009929.2	endostatin	scl37787.43_431
Tmem4	185.5	234.4	1	1	14.3991	scl38287.7.1_16-S	NM_019953.1	5330432A10Rik;D10Bwg1546e;Zsig9	scl38287.7.1_16
4921518A06Rik	562.9	698.7	1	1	14.3999	scl066726.1_64-S	NM_198293.1		scl066726.1_64
Hibadh	1374.9	1699.4	1	1	14.4026	scl28993.8_275-S	NM_145567.1	6430402H10Rik;AI265272	scl28993.8_275
Ftcd	24.2	62.8	0.9857	0.9975	14.4068	scl38741.14.1_74-S	NM_080845.1		scl38741.14.1_74
Selpl	3798.9	5074.2	1	1	14.4372	scl26191.2_17-S	NM_009151.2	Psgl-1;Psgl1	scl26191.2_17
Nt5m	227.7	286.3	1	1	14.4403	scl00103850.1_287-S	NM_134029.1	2010013E09Rik;AI846937;dNT-2	scl00103850.1_287
Mtss1	37.6	55	0.9931	0.9969	14.4424	scl00211401.1_202-S	NM_144800.1	2310003N14Rik;BC024131;D130001D01Rik;MGC37896;Mim;mKIAA0429	scl00211401.1_202
Atp6v0e	2043.7	2524.6	1	1	14.4426	scl50948.6.850_26-S	NM_025272.1	Atp6k;M9.2	scl50948.6.850_26
Aim1	197.1	248.9	1	1	14.4529	scl37999.19_246-S	NM_172393.1		scl37999.19_246
D19Wsu12e	185.6	235.9	1	1	14.4664	scl52590.16_341-S	XM_358328.1		scl52590.16_341
Ubap2l	422	539.5	1	1	14.4715	scl0074383.1_273-S	NM_028475.1		scl0074383.1_273
Trim34	57	188.3	0.9963	1	14.4745	scl0094094.2_63-S	NM_030684.1		scl0094094.2_63
Cklfsf7	826.1	1071.5	1	1	14.477	scl0003450.1_9-S	NM_133978.1		scl0003450.1_9
1200002N14Rik	274.9	383.1	1	1	14.4886	scl37649.7_307-S	NM_027878.1		scl37649.7_307
LOC231396	15.3	86.7	0.9626	0.9994	14.497	GI_38080224-S	XM_132178.2		GI_38080224
2700088M22Rik	221.4	315.7	1	1	14.4988	scl46821.2.2_6-S	NM_026025	MADP-1	scl46821.2.2_6
Mcee	366	545.3	1	1	14.5151	scl32577.4.1_30-S	XM_133510.4		scl32577.4.1_30
Pop4	381.2	612	1	1	14.5224	scl0066161.2_298-S	NM_025390.2	1110023P21Rik;Rpp29	scl0066161.2_298
Sec13l1	1177.6	1458	1	1	14.5301	scl28535.9.1_27-S	NM_024206.3	1110003H02Rik;Sec13r	scl28535.9.1_27
Olfr887	7.8	21.7	0.8865	0.9857	14.5403	scl37106.1.1_52-S	NM_146423.1	MOR162-5	scl37106.1.1_52
Cda	1	14.3	0.6307	0.9676	14.5534	scl23634.2.3_40-S	XM_131801.1		scl23634.2.3_40
P2rx1	72.8	129.8	0.9975	1	14.5552	scl41299.12.1_258-S	NM_008771.2	P2x	scl41299.12.1_258
Cpb2	4	37.8	0.7829	0.9938	14.5618	scl000404.1_21-S	NM_019775.2	1110032P04Rik;4930405E17Rik;CPR;Cpu;TAFI	scl000404.1_21
0610009F02Rik	459	632.1	1	1	14.5626	scl076073.9_113-S	NM_029508.1		scl076073.9_113
Slc35a3	9.4	22.7	0.9133	0.9869	14.5672	scl00229782.2_107-S	NM_144902.2	2310050P13Rik;MGC36317	scl00229782.2_107
Eif4e	61.2	106	0.9963	0.9994	14.5729	scl013684.8_6-S	NM_007917.2	eIF-4E;Eif4e-ps;If4e	scl013684.8_6
2310061A22Rik	429.1	648.9	1	1	14.5761	scl1412.1.1_281-S	NM_025872	CGI-141	scl1412.1.1_281
Napg	637.3	799.8	1	1	14.5883	scl0108123.14_161-S	XM_355095	2400003O04Rik	scl0108123.14_161
Trappc6b	124.8	160.4	0.9994	1	14.5903	scl0002291.1_1-S	XM_127025.2		scl0002291.1_1
Yme1l1	12.2	25.6	0.9414	0.99	14.5958	scl0003089.1_75-S	NM_013771.2	Ftsh;FtsH1	scl0003089.1_75
4933402L21Rik	45.6	67.1	0.995	0.9981	14.6012	GI_38091844-S	XM_203501.2		GI_38091844
Stk19	99.8	145.2	0.9994	1	14.6037	scl50012.2.189_28-S	NM_019442	G11;RP1	scl50012.2.189_28
Psmd3	3022.8	4160.9	1	1	14.6081	scl0022123.1_274-S	NM_009439.1	AntP91a;D11Bwg1349e;Psd3;Tstap91a	scl0022123.1_274
Serhl	7.8	33.3	0.8971	0.9925	14.6114	scl068607.10_2-S	NM_023475.2	0610008B10Rik;1110019M09Rik	scl068607.10_2
A630046C11Rik	131.8	169.3	0.9994	1	14.6159	ri|A630046C11|PX00145N19|AK041906|1136-S	AK041906		ri|A630046C11|PX00145N19|AK041906|1136
Vrk3	727.5	903.5	1	1	14.6296	GI_19527165-S	NM_133945.1	AI428238	GI_19527165
1700081H05Rik	94.1	157.7	0.9994	1	14.6527	GI_20897783-S	XM_147789.1		GI_20897783
2610027L16Rik	445.5	575.8	1	1	14.6639	scl46268.10.1_3-S	NM_026403.2		scl46268.10.1_3
0610012G03Rik	530.4	703.9	1	1	14.6667	scl48561.1.13_8-S	NM_025320	AI839730	scl48561.1.13_8
1810046J19Rik	1819.7	2253.2	1	1	14.6705	scl39620.4_46-S	NM_025559.1	AI463380	scl39620.4_46
0610010F05Rik	36.8	54.2	0.9919	0.9969	14.6758	scl071675.1_1-S	XM_203572.3		scl071675.1_1
Rnf7	109.7	144.9	0.9994	1	14.6766	scl35488.3_0-S	XM_135065.1		scl35488.3_0
Ripk1	154.4	196.9	0.9994	1	14.6802	scl0019766.1_197-S	NM_009068.3	D330015H01Rik;Rinp;RIP	scl0019766.1_197
C530044N13Rik	131.2	168.4	0.9994	1	14.6815	scl48750.6_548-S	NM_146067	MGC27760	scl48750.6_548
Fbxo3	139.2	192.2	0.9994	1	14.6927	scl0003006.1_310-S	NM_212433.1	1200002G09Rik;1700026K02Rik;Fba	scl0003006.1_310
4930564D15Rik	487	607.1	1	1	14.6974	scl22839.1.328_39-S			scl22839.1.328_39
Atp6v1e1	2146.3	2939.9	1	1	14.7031	scl0011973.2_248-S	NM_007510.2	2410029D23Rik;Atp6e;Atp6e2;Atp6v1e;D6Ertd385e;E2	scl0011973.2_248
Nme6	39.3	77.6	0.9938	0.9994	14.7087	scl36442.5.5_16-S	NM_018757.1	nm23-M6	scl36442.5.5_16
Cfi	24.7	67.6	0.9863	0.9981	14.7156	scl22625.14.1_91-S	NM_007686.1		scl22625.14.1_91
Htatip2	190.2	529	1	1	14.72	scl32632.7.1_23-S	NM_016865.2	30kDa;CC3;TIP30	scl32632.7.1_23
Smpdl3a	519.2	646.9	1	1	14.7208	scl38908.9.1_88-S	NM_020561.1	0610010C24Rik;ASM3A;ASML3;ASML3A	scl38908.9.1_88
Fbxl10	165.8	224.2	1	1	14.7429	scl030841.1_204-S			scl030841.1_204
Rgs16	30.6	72.4	0.9906	0.9994	14.7492	scl17359.5_60-S	NM_011267.1	Rgs14;Rgsr	scl17359.5_60
2810405J04Rik	677.1	847.8	1	1	14.7554	scl072722.1_216-S	NM_133747.1		scl072722.1_216
5330430P07Rik	805.5	1018.4	1	1	14.7681	ri|5330430P07|PX00054C24|AK030554|2441-S	AK030554		ri|5330430P07|PX00054C24|AK030554|2441
Gorasp2	56.4	96.9	0.9963	0.9994	14.7683	scl0003043.1_9-S	NM_027352.2	0610011A07Rik;2410043M02Rik;5730520M13Rik;9430094F20Rik;GOLPH2;GRASP55;GRS2;p59	scl0003043.1_9
Ddx26	964.5	1197.8	1	1	14.7723	scl0018130.2_77-S	NM_008715.1	2900075H24Rik;DICE1;HDB;Notch2l	scl0018130.2_77
Ddx48	913	1223.3	1	1	14.7729	scl0192170.3_20-S	NM_138669.1	2400003O03Rik;MGC6664;MGC6715;mKIAA0111	scl0192170.3_20
Mrpl48	200.2	288.2	1	1	14.774	scl000251.1_1-S	NM_026971.2	1810030E20Rik;2610028L11Rik;CGI-118;D4Ertd786e	scl000251.1_1
E2f6	95.6	129.4	0.9994	1	14.7795	scl050496.7_1-S	NM_033270	EMA	scl050496.7_1
	166.2	231	1	1	14.7835	scl000408.1_6-S	AK009508.1		scl000408.1_6
Nola3	448.3	616.6	1	1	14.7851	scl20479.1.60_10-S	NM_025403.1	1110036B12Rik;NOP10;NOP10P	scl20479.1.60_10
Arf1	2958.8	3665.6	1	1	14.8103	GI_31560734-S	NM_007476.2		GI_31560734
Fcrl5	65	138.8	0.9969	1	14.8201	GI_51510888-S	NM_183222.2	Fcrh3;mBXMH2	GI_51510888
Taf11	419.3	560.3	1	1	14.8377	scl068776.1_229-S	NM_026836.1	1110038O14Rik;28kDa;PRO214;TAF2I;TAFII28	scl068776.1_229
Stard4	437.2	632.4	1	1	14.8377	scl51558.7_199-S	NM_133774	4632419C16Rik;9030213J02Rik	scl51558.7_199
D6Wsu163e	115.5	154.1	0.9994	1	14.8379	scl29486.14.1_29-S	NM_138594.2		scl29486.14.1_29
A130092J06Rik	1215.6	1674.1	1	1	14.8415	scl19453.6.2634_3-S	NM_175511.2		scl19453.6.2634_3
5033425B17Rik	1246.6	1676.9	1	1	14.8534	scl31512.7.1_16-S	NM_027215	2010004E11Rik;Nifie14	scl31512.7.1_16
Klhdc2	33	61.8	0.9906	0.9975	14.8551	scl43155.10.40_7-S	NM_027117.1	2310022K15Rik;D12Ertd522e;HCLP-1;LCP	scl43155.10.40_7
Ndufv1	1621	2549.9	1	1	14.8564	scl53438.9.1_79-S	NM_133666.1		scl53438.9.1_79
Mpi1	190.4	241.6	1	1	14.8607	scl35790.9.1_0-S	XM_134931.3		scl35790.9.1_0
C80879	139.9	207.3	0.9994	1	14.8641	scl026374.8_4-S	NM_011931.1	Cop1	scl026374.8_4
2610009I02Rik	13.2	29.9	0.9476	0.9906	14.8659	scl000497.1_21-S	NM_029839.1	9030425C13Rik	scl000497.1_21
2410014A08Rik	72.6	101	0.9975	0.9994	14.8767	scl00109154.1_9-S	NM_175403.2	ESTM19;mKIAA0152	scl00109154.1_9
5730409G07Rik	119.5	167.8	0.9994	1	14.8774	scl40311.8.1_101-S	XM_126359.2		scl40311.8.1_101
2310022A10Rik	227	357.6	1	1	14.8826	scl32892.12_87-S	NM_175107		scl32892.12_87
1110054H05Rik	191.6	243.2	1	1	14.8902	scl068837.8_1-S	XM_126489.5		scl068837.8_1
Nme6	62.2	96	0.9963	0.9994	14.9218	scl0003589.1_16-S	NM_018757.1	nm23-M6	scl0003589.1_16
Itih4	23.1	72.1	0.9844	0.9994	14.9301	scl000391.1_15-S	NM_018746.1	Itih-4	scl000391.1_15
9630058J23Rik	230.9	308.5	1	1	14.9302	scl17152.12_234-S	NM_146105.3	MGC31547	scl17152.12_234
Rock1	250.9	328.3	1	1	14.9392	scl0019877.2_272-S	NM_009071.1	1110055K06Rik;Rock-I	scl0019877.2_272
LOC224147	2129.3	2784.9	1	1	14.9411	GI_38079801-S	XM_147971.2		GI_38079801
2010004N17Rik	40.5	64.5	0.9944	0.9975	14.947	ri|2010004N17|ZX00043B24|AK008106|1914-S	AK008106		ri|2010004N17|ZX00043B24|AK008106|1914
Trnt1	209.5	298.9	1	1	14.9493	scl29679.10.1_75-S	NM_027296.1	2410043H24Rik;2610044E04Rik;CGI-47;mt-Trat	scl29679.10.1_75
Cope	1190.4	1514.4	1	1	14.9507	scl059042.7_5-S	NM_021538.1	1110005D17Rik;Cope1	scl059042.7_5
Arpc1a	514.4	679.5	1	1	14.9621	scl0004033.1_10-S	NM_019767.1	0610010H08Rik;1110030K07Rik;41kDa;Sid32;Sid329	scl0004033.1_10
9130023F12Rik	430.3	553.6	1	1	14.9649	scl40468.10_17-S	NM_181411.2		scl40468.10_17
2810407C02Rik	73.5	105.1	0.9975	0.9994	14.997	GI_38076517-S	XM_283848.2		GI_38076517
D2Bwg1335e	357.4	448.3	1	1	14.998	ri|1110034G11|R000017P11|AK004089|731-S	AK004089		ri|1110034G11|R000017P11|AK004089|731
Exosc7	1203.8	2017.9	1	1	15.0018	scl36296.9.19_70-S	XM_284543.2		scl36296.9.19_70
0610039G24Rik	9.1	24.7	0.9083	0.9888	15.0281	scl0004063.1_90-S	XM_132020.4		scl0004063.1_90
Atp6ap2	97.8	147.5	0.9994	1	15.0298	scl0002902.1_39-S	NM_027439.2	5730403E06Rik;APT6M8-9;Atp6ip2;ATP6M8-9;M8-9	scl0002902.1_39
1810046I24Rik	90.5	183.4	0.9994	1	15.0333	scl0001188.1_5-S	NM_027218.1	DCAR	scl0001188.1_5
Slc2a3	655.3	885.5	1	1	15.0345	scl28438.14_163-S	NM_011401.2	Glut-3;Glut3	scl28438.14_163
Smad2	101	135.4	0.9994	1	15.0345	scl51751.12_504-S	NM_010754.2		scl51751.12_504
AI839550	72.3	97.2	0.9975	0.9994	15.0572	scl32819.7.1_18-S	NM_198027.2	C130099A02	scl32819.7.1_18
Elovl1	283.9	428.1	1	1	15.0806	scl25041.1.49_5-S	NM_019422.1	Ssc1	scl25041.1.49_5
0610007L01Rik	440.1	596.6	1	1	15.0815	ri|0610007L01|R000001M10|AK002297|1310-S	AK002297		ri|0610007L01|R000001M10|AK002297|1310
Dnajc12	21.5	36.7	0.9813	0.9944	15.0863	scl38846.4.1_6-S	NM_013888.1	Jdp1;mJDP1	scl38846.4.1_6
Jarid1b	23.6	54.8	0.9844	0.9969	15.0897	scl17448.26_107-S	NM_152895	2010009J12Rik;2210016I17Rik;AW556288;D1Ertd202e;PLU-1;Plu1;PUT1;Rb-Bp2;RBBP2H1A	scl17448.26_107
5730449L18Rik	29.4	48	0.9894	0.9956	15.093	scl0066637.1_0-S	NM_025677.1		scl0066637.1_0
Pxmp3	308.1	387.7	1	1	15.0978	scl22415.7_11-S	NM_008994.2	35kDa;D3Ertd138e;PEX2;PMP35	scl22415.7_11
Slc35a3	494.2	618.3	1	1	15.1038	scl21606.12_118-S	NM_144902	2310050P13Rik;MGC36317	scl21606.12_118
Angptl4	230.5	312	1	1	15.1129	scl0057875.2_106-S	NM_020581.1	ARP4;Bk89;FIAF;HFARP;Ng27;PGAR;PGARG;pp1158	scl0057875.2_106
Gpr172b	137.3	176.8	0.9994	1	15.1201	scl052710.5_1-S	NM_029643.2		scl052710.5_1
Ldh1	2472.7	3631.6	1	1	15.1409	scl016828.6_330-S	NM_010699.1	Ldh-1;LDH-A;Ldha	scl016828.6_330
Slc35b1	956.5	1192.1	1	1	15.1476	scl50689.6_424-S	XM_128634.4		scl50689.6_424
LOC233401	16	35.1	0.9638	0.9938	15.1494	GI_38086948-S	XM_133561.4		GI_38086948
2700038I16Rik	290	365.5	1	1	15.158	scl26985.7_260-S	NM_028298.2	9030409O18Rik	scl26985.7_260
Iqgap1	686.3	861.4	1	1	15.1645	scl0029875.2_286-S	NM_016721.1	D7Ertd237e;D7Ertd257e;mKIAA0051	scl0029875.2_286
LOC385643	7.4	66	0.8846	0.9975	15.1696	GI_41235783-S	NM_201375.1		GI_41235783
LOC224163	1195.1	1488.6	1	1	15.1729	GI_38079951-S	XM_147236.2		GI_38079951
Pias1	388.4	487.5	1	1	15.1782	scl0056469.2_305-S	NM_019663.2	2900068C24Rik;Ddxbp1;GBP	scl0056469.2_305
Nasp	158.7	328.6	1	1	15.1789	scl0002675.1_35-S	NM_016777.2	5033430J04Rik;Epcs32	scl0002675.1_35
Fxc1	544.9	731.2	1	1	15.1863	scl00089.1_20-S	NM_019502.2	FxC1;Tim10b;Tim9b;Timm10b	scl00089.1_20
Irak4	63.7	113.8	0.9963	0.9994	15.1912	scl47581.8.1_10-S	NM_029926.3	8430405M07Rik;9330209D03Rik;IRAK-4;NY-REN-64	scl47581.8.1_10
1110060F11Rik	306.4	385.9	1	1	15.1928	scl23442.8_471-S	NM_026395.1	5830454N22Rik	scl23442.8_471
Rbm28	550.4	707.7	1	1	15.1951	scl0068272.1_99-S	NM_133925.1		scl0068272.1_99
Mnat1	171.1	218.6	1	1	15.1981	scl0002412.1_56-S	NM_008612.1	MAT1;P36	scl0002412.1_56
1100001F19Rik	178	243.2	1	1	15.2	GI_20878323-S	XM_124187.1		GI_20878323
Tle1	45.3	65.2	0.995	0.9981	15.2062	scl021885.1_30-S	NM_011599.2	C230057C06Rik;Grg1	scl021885.1_30
Zfp46	224	317.7	1	1	15.2406	scl24818.5.937_3-S	NM_009557.1	Zfp-46	scl24818.5.937_3
Zdhhc13	35.3	63	0.9906	0.9975	15.2418	scl000214.1_15-S	NM_028031.1		scl000214.1_15
2610528A15Rik	241.2	339.9	1	1	15.2468	scl43496.27.1_1-S	NM_028151.1	mKIAA0052	scl43496.27.1_1
Itga2b	64.4	118.7	0.9969	0.9994	15.2469	scl016399.1_7-S	NM_010575.1	alphaIIb;CD41;CD41B;GpIIb	scl016399.1_7
Ranbp1	1249	1853.1	1	1	15.2608	scl019385.1_25-S	NM_011239.1	Htf9a	scl019385.1_25
Abhd1	49	69.3	0.9963	0.9988	15.2877	scl27967.7.1_149-S	NM_021304.2	LABH-1;LABH1	scl27967.7.1_149
Xpot	304.7	449.4	1	1	15.2906	scl076284.1_94-S	XM_125902		scl076284.1_94
Ptp4a2	6195.4	7704.5	1	1	15.2938	scl019244.5_2-S	NM_008974.2	Prl-2	scl019244.5_2
Rrm1	380.4	1037.9	1	1	15.301	scl32275.19.1_102-S	NM_009103	RnrM1	scl32275.19.1_102
Sox6	89.6	122.8	0.9994	1	15.304	scl00044.1_11-S	NM_011445.1		scl00044.1_11
2810417H13Rik	145.3	303.8	0.9994	1	15.3214	scl36799.4_9-S	NM_026515.1	MGC29306;mKIAA0101;Ns5apt9;Ns5atp9	scl36799.4_9
4930453N24Rik	240.9	308.3	1	1	15.3264	GI_38079837-S	XM_148353.3		GI_38079837
Mrpl46	668.3	995.4	1	1	15.3375	scl31161.4.1_8-S	NM_023331.2	3110052F15Rik;C15orf4;LIECG2;P2ECSL	scl31161.4.1_8
Cyp2a4	8.3	53.9	0.9014	0.9963	15.3409	scl0013086.1_58-S	NM_009997	Cyp15a1;D7Ucla4	scl0013086.1_58
Atp6v0d1	345.7	486.4	1	1	15.3412	scl000737.1_18-S	NM_013477.2	Ac39;Atp6d;P39;VATX;Vma6	scl000737.1_18
Txnl4b	144.7	193.2	0.9994	1	15.3461	scl33340.4_635-S	NM_175646.2		scl33340.4_635
1810010N17Rik	223.2	318.8	1	1	15.3519	scl0002652.1_12-S	NM_025455.1	1110002E08Rik	scl0002652.1_12
A230106M15Rik	123.4	160.2	0.9994	1	15.3642	scl00231717.2_326-S	NM_175474.2		scl00231717.2_326
Fbxo6b	781.9	977.4	1	1	15.3678	scl23523.7.1_20-S	NM_015797.1	FBG2;Fbs2;Fbx6b	scl23523.7.1_20
Slc2a6	104.5	159.2	0.9994	1	15.3766	scl19511.8_175-S	NM_172659.1	A330096C23;F630103L12Rik;Glut6;Glut9	scl19511.8_175
C78541	351.4	457.1	1	1	15.3867	scl0002568.1_14-S	NM_133800.2		scl0002568.1_14
Mrrf	48.5	77.4	0.9963	0.9994	15.3878	scl0003223.1_29-S	NM_026422.1	2400002D02Rik;MRFF;MTRRF;RRF	scl0003223.1_29
Egln3	5.9	21.2	0.8415	0.9844	15.4047	scl0112407.1_41-S	NM_028133.1	2610021G09Rik;SM-20	scl0112407.1_41
1200009K13Rik	161.5	222.7	1	1	15.4199	scl0066870.1_13-S	NM_025814.1	Pairbp1	scl0066870.1_13
Nup54	14	29.7	0.9526	0.99	15.4214	scl0269113.11_22-S	NM_183392.1		scl0269113.11_22
Cdk2ap1	3035.6	4065.7	1	1	15.4225	scl013445.1_266-S	NM_013812.1	Apc10;Cdkap1;doc-1;Doc1;DORC1;ST19	scl013445.1_266
1700001A24Rik	365.8	477.9	1	1	15.4279	scl0108991.1_11-S	NM_175395.2		scl0108991.1_11
Fga	124.6	661.1	0.9994	1	15.4553	scl23057.6_324-S	NM_010196.1	Fib	scl23057.6_324
2400007G07Rik	818.6	1244.7	1	1	15.4749	ri|2400007G07|ZX00041I11|AK010296|2164-S	AK010296		ri|2400007G07|ZX00041I11|AK010296|2164
Psmb3	2146.6	2882.7	1	1	15.4839	GI_31981321-S	NM_011971.2	C10-II	GI_31981321
Utp14a	47.1	67.2	0.9956	0.9981	15.4855	scl072554.6_30-S	XM_135857.4		scl072554.6_30
Usp16	207.3	273.6	1	1	15.4886	scl48911.16.3_18-S	NM_024258.1	1200004E02Rik;2810483I07Rik;6330514E22Rik;UBP-M	scl48911.16.3_18
Hnrpab	2042.4	3010.3	1	1	15.4988	scl015384.1_1-S	NM_010448.2	CBF-A;Cgbfa	scl015384.1_1
Rpp30	244.2	374.3	1	1	15.5173	scl53186.10.89_4-S	NM_019428.2	Rnasep2;TSG15	scl53186.10.89_4
Psat1	20.5	36.6	0.9794	0.9944	15.5312	scl000469.1_48-S	XM_129211.2		scl000469.1_48
Tcea3	63	108.9	0.9963	0.9994	15.5318	scl24819.10.1_28-S	NM_011542	S-II	scl24819.10.1_28
Surf2	129.3	167.7	0.9994	1	15.5332	scl020931.4_63-S	NM_013678.1	Surf-2	scl020931.4_63
Ubxd1	459.9	578.2	1	1	15.5337	scl066530.2_0-S	NM_024432.2	1200008L11Rik;2210415J11Rik;Ubxdc2	scl066530.2_0
Il1rap	5.1	18.3	0.8216	0.98	15.5355	scl016180.8_13-S	NM_008364.1	AI255955;IL-1RAcP	scl016180.8_13
Orc3l	69.6	94.5	0.9975	0.9994	15.5497	scl0050793.2_215-S	NM_015824.2	AU019887;Orc3	scl0050793.2_215
Pml	97.3	135.2	0.9994	1	15.556	scl35776.11_344-S	NM_008884	1200009E24Rik;Trim19	scl35776.11_344
1500031L02Rik	66.8	91.1	0.9975	0.9994	15.5586	scl49245.4_458-S	NM_025892.1		scl49245.4_458
2600001B17Rik	154.4	201.5	0.9994	1	15.5599	scl39516.6_65-S	NM_172947		scl39516.6_65
0610009O03Rik	729.5	914	1	1	15.5611	scl26700.8.1_2-S	NM_026660.2	Tetran	scl26700.8.1_2
LOC380747	11734.8	14924	1	1	15.5802	GI_38049291-S	XM_354660.1		GI_38049291
MGC67181	4	30.8	0.7717	0.9906	15.5811	scl0075615.1_61-S	NM_198619.1		scl0075615.1_61
Tbl3	119.9	167.6	0.9994	1	15.5862	scl50201.19.1_86-S	NM_145396.3	9430070M15Rik	scl50201.19.1_86
Serpina1a	2.8	23.2	0.7399	0.9869	15.5874	scl0002303.1_158-S	NM_009243	PI1;Spi1-1;Spi1-3	scl0002303.1_158
Aprt	1507	1934.9	1	1	15.6063	scl011821.1_236-S	NM_009698.1	MGC11749	scl011821.1_236
Yif1	578.7	726.5	1	1	15.6115	scl000533.1_30-S	NM_026553.2	5330422J23Rik;54TM;Yif1p	scl000533.1_30
Nubp1	521.1	654.8	1	1	15.6157	scl49440.8.1_1-S	NM_011955.1		scl49440.8.1_1
Atf7ip	260.4	601.7	1	1	15.6191	scl054343.15_6-S	NM_019426.2	AM	scl054343.15_6
	114.1	149	0.9994	1	15.629	scl0004176.1_1597-S	AK047172.1		scl0004176.1_1597
Nup37	18.9	44	0.9757	0.9956	15.6356	scl0003797.1_22-S	NM_028334.1	2410003L22Rik;2810039M17Rik	scl0003797.1_22
AU067695	58	81.9	0.9963	0.9994	15.6401	scl0381802.12_9-S	NM_199033.1	MGC69703	scl0381802.12_9
Slc6a4	53.9	150.5	0.9963	1	15.6461	scl41241.14.1_17-S	NM_010484.1	5-HTT;Htt;Sert	scl41241.14.1_17
Csrp2bp	516.8	649.8	1	1	15.6562	scl0228714.3_276-S	NM_181417.2	2510008M08Rik;D2Ertd473e;E430020F17	scl0228714.3_276
D5Wsu178e	89.2	148.5	0.9994	1	15.6647	scl0028042.1_319-S	NM_027652.1	4933402G07Rik;KIAA1724;mKIAA1724;SELI	scl0028042.1_319
Wbscr22	393.3	496	1	1	15.6706	scl25931.11.1_56-S	NM_025375.1	1110003N24Rik	scl25931.11.1_56
Itpkc	99.8	135.2	0.9994	1	15.6709	scl31608.7.1_161-S	NM_181593.2	9130023N17;9130023N17Rik	scl31608.7.1_161
Igtp	801.4	1004.5	1	1	15.6713	scl016145.5_111-S	NM_018738.2		scl016145.5_111
Vps28	3123.5	4007.6	1	1	15.6744	scl47036.7.1_29-S	NM_025842.1	1110014J03Rik;D730005C08Rik	scl47036.7.1_29
Lrrfip2	64	89.4	0.9963	0.9994	15.6794	scl36411.19_355-S	XM_284541.1		scl36411.19_355
Myo6	140.4	181.6	0.9994	1	15.6864	scl36669.38.1_11-S	NM_008662.1	sv	scl36669.38.1_11
Rps19	10.5	26.9	0.9295	0.99	15.6906	scl0020085.2_0-S	NM_023133.1		scl0020085.2_0
Siglecl1	14.9	30.5	0.9601	0.9906	15.7023	scl000105.1_286-S	NM_031181.1	Cd170;mSiglec-E;Siglec5	scl000105.1_286
Dhodh	245.8	312.4	1	1	15.7053	scl0056749.2_187-S	NM_020046.2	2810417D19Rik	scl0056749.2_187
1810033B17Rik	70.1	106.8	0.9975	0.9994	15.7166	scl34127.7.1_0-S	XM_110690.2		scl34127.7.1_0
Mtx1	492.9	706.6	1	1	15.7281	scl0002111.1_12-S	NM_013604.1	Gcap6;Mtx	scl0002111.1_12
Socs4	63.9	87.7	0.9963	0.9994	15.7469	scl0067296.2_190-S	NM_080843.1	3110032M18Rik;Socs7	scl0067296.2_190
Tbcc	573.2	720.6	1	1	15.7584	scl50668.1.78_47-S	NM_178385.2	2810055C19Rik	scl50668.1.78_47
Ezh2	160.6	288.3	1	1	15.76	scl0001138.1_17-S	NM_007971.1	Enx-1;Enx1h	scl0001138.1_17
Tcp1	1045.6	1638.3	1	1	15.7609	scl51111.10.24_9-S	NM_013686.1	c-cpn;CCT;Cct1;Ccta;p63;Tcp-1;Tp63;TRic	scl51111.10.24_9
Pes1	97.9	129.3	0.9994	1	15.7642	scl0064934.1_269-S	NM_022889.2		scl0064934.1_269
Mlh1	129.7	223.9	0.9994	1	15.7713	scl35303.18.1_6-S	NM_026810.1	1110035C23Rik	scl35303.18.1_6
Dhdds	122.8	160.1	0.9994	1	15.7741	scl0002852.1_47-S	NM_026144.2	3222401G21Rik;DS;HDS	scl0002852.1_47
Nola1	1114.9	1693.1	1	1	15.7789	scl21518.7.1_44-S	NM_026578.1	C430047J18Rik;GAR1	scl21518.7.1_44
Cycs	411.5	761	1	1	15.7861	scl013063.3_11-S	NM_007808.2		scl013063.3_11
Prkrip1	120.2	156.9	0.9994	1	15.7879	scl066801.6_14-S	NM_025774.1	8430424D23Rik;C114	scl066801.6_14
B230378H13Rik	1407.3	1762.2	1	1	15.8077	scl00320165.1_190-S	NM_177089.3	4833447E04Rik;Tacc1	scl00320165.1_190
Dbi	2485.7	3109.4	1	1	15.8117	scl16375.7_22-S	NM_007830.2	ACBD1;Acbp	scl16375.7_22
Cfdp1	293	436.1	1	1	15.8215	scl023837.2_17-S	NM_011801.1		scl023837.2_17
Smc1l1	1092.7	1640.9	1	1	15.8266	scl0024061.1_292-S	NM_019710.1	5830426I24Rik;SB1.8;Smc1;Smc1alpha;SmcB	scl0024061.1_292
Stat3	1162.9	1461.9	1	1	15.8537	scl0020848.1_188-S	NM_011486.2	1110034C02Rik;Aprf	scl0020848.1_188
Dpm2	811.8	1019.2	1	1	15.8538	scl013481.4_295-S	NM_010073.2		scl013481.4_295
1110003E08Rik	24	41.5	0.985	0.9956	15.8597	scl27619.5_72-S	XM_284098		scl27619.5_72
Cox4i1	7340.2	9422.2	1	1	15.862	scl33243.5.1_27-S	NM_009941.1	Cox4;Cox4a	scl33243.5.1_27
Keo4	102.7	139.5	0.9994	1	15.87	scl52453.11_571-S	NM_145502.2		scl52453.11_571
Arg1	18.2	115.4	0.9757	0.9994	15.8775	scl38114.7.1_13-S	NM_007482	AI;Arg-1;PGIF	scl38114.7.1_13
Cbr3	58.3	81.1	0.9963	0.9994	15.8797	scl48854.3.1_11-S	NM_173047.2	1110001J05Rik	scl48854.3.1_11
Anp32b	179.7	294.5	1	1	15.8894	scl0067628.2_84-S	NM_130889.1	2410015B15Rik;PAL31;PHAPI2a;Ssp29	scl0067628.2_84
BC026590	111.1	175.3	0.9994	1	15.8969	scl0230234.6_30-S	XM_485382		scl0230234.6_30
2700049A03Rik	129.7	177.4	0.9994	1	15.9097	scl43130.32.1_184-S	XM_126944.3		scl43130.32.1_184
Igh-1a	8727.9	15837.5	1	1	15.9171	scl0380793.1_210-S	XM_354704.1		scl0380793.1_210
2610018L09Rik	503.3	685.3	1	1	15.9234	scl000359.1_0-S	NM_172254.2	5730511P15Rik;AV083614	scl000359.1_0
Zdhhc7	895.3	1124.3	1	1	15.9351	scl34254.8_613-S	NM_133967.2	AL024087;Gramp2	scl34254.8_613
1110021H02Rik	1025.6	1287.1	1	1	15.9355	scl15945.4.1_0-S	NM_025388.1	ESTM29	scl15945.4.1_0
Timm50	267.6	431.5	1	1	15.9358	scl31584.11.1_18-S	NM_025616.1		scl31584.11.1_18
Cyp2a5	24	63	0.985	0.9975	15.9451	scl00023.1_1-S	NM_007812.1	Coh;Cyp15a2	scl00023.1_1
1110008L16Rik	163.6	226.1	1	1	15.9533	scl43198.8.1_55-S	XM_126928.4		scl43198.8.1_55
Dusp16	123.4	309.6	0.9994	1	15.9538	scl0070686.2_11-S	NM_130447.1	3830417M17Rik;D6Ertd213e;MKP-7;MKP7	scl0070686.2_11
4921521J11Rik	291.2	625.5	1	1	15.954	scl0070885.2_95-S	NM_027590.1		scl0070885.2_95
Ttc1	467.3	589.7	1	1	15.9626	scl0066827.2_11-S	NM_133795.1	4833412C19Rik;TPR1	scl0066827.2_11
C86073	146.6	211	0.9994	1	15.975	GI_85701607-S	NM_001033190.1		GI_85701607
2810441C07Rik	38.7	94	0.9938	0.9994	16.0164	scl23613.33_174-S	NM_172415.2	mKIAA1626	scl23613.33_174
Slc35b1	179.4	250.7	1	1	16.0197	scl0001763.1_85-S	XM_128634.4		scl0001763.1_85
Irf2	771.5	1034.1	1	1	16.0198	scl33841.11_453-S	NM_008391.2	9830146E22Rik;Irf-2	scl33841.11_453
Cdc34	72.3	120.1	0.9975	0.9994	16.0268	scl00216150.1_133-S	NM_177613.2	UBE2R1	scl00216150.1_133
Pitpnm1	1157.7	1568.8	1	1	16.0381	scl52806.22.1_43-S	NM_008851.1		scl52806.22.1_43
Mipep	277.8	385.9	1	1	16.0383	scl070478.15_14-S	NM_027436.1	5730405E07Rik	scl070478.15_14
Lasp1	1389.8	1794.9	1	1	16.0506	scl0016796.1_242-S	NM_010688.2	Def-4;SH3P6	scl0016796.1_242
LOC382512	898.2	1138.4	1	1	16.066	GI_38091607-S	XM_356542.1		GI_38091607
Ctps	431.2	712.9	1	1	16.0662	scl23887.17.1_103-S	NM_016748.1		scl23887.17.1_103
Psmd10	18.4	33.8	0.9757	0.9931	16.0846	scl0002924.1_11-S	NM_016883.3		scl0002924.1_11
Stub1	106.6	142	0.9994	1	16.0958	scl50166.4.1_1-S	NM_019719.2	0610033N24Rik;2210017D18Rik;Chip	scl50166.4.1_1
1190003J15Rik	44.1	131.3	0.995	1	16.0964	scl31909.4.1_14-S	XM_133915.3		scl31909.4.1_14
D11Moh34	50.7	75.1	0.9963	0.9994	16.0971	scl027681.7_4-S	NM_033568.1	MGC7335	scl027681.7_4
Acadl	34	53.2	0.9906	0.9969	16.1004	scl000906.1_50-S	NM_007381.2	LCAD	scl000906.1_50
Bcl2l11	85.3	133.3	0.9988	1	16.1061	scl20316.6_256-S	NM_009754.2	Bim;Bod	scl20316.6_256
Ndufa8	659.6	906.8	1	1	16.1416	scl19390.3.3_3-S	NM_026703.1	0610033L03Rik	scl19390.3.3_3
Slc29a1	62.7	105.3	0.9963	0.9994	16.143	scl0001641.1_31-S	BC004828	1200014D21Rik;ENT1	scl0001641.1_31
0610007P14Rik	370.9	470.1	1	1	16.1441	scl058520.1_161-S	NM_021446		scl058520.1_161
Ech1	449.3	568.3	1	1	16.1532	scl32856.10.1_9-S	NM_016772.1		scl32856.10.1_9
Hip2	357.1	461.4	1	1	16.1612	scl0003990.1_13-S	NM_016786.2	D5Ertd601e	scl0003990.1_13
Extl2	146.7	208.4	0.9994	1	16.1707	scl22694.6_358-S	NM_021388.2	3000001D04Rik	scl22694.6_358
B430206E18Rik	-3.2	11.8	0.33	0.947	16.1747	scl34999.9.1_89-S	XM_284398.1		scl34999.9.1_89
Nalp6	9.4	23.5	0.9152	0.9881	16.1759	scl31905.5_10-S	NM_133946.1	AI504961;Pypaf5	scl31905.5_10
Ube2l3	2163.8	2715.9	1	1	16.1868	scl0022195.1_278-S	XM_148568.1	C79827;Ubce7;UbcM4	scl0022195.1_278
Galt	384	486.7	1	1	16.195	scl0002692.1_59-S	NM_016658.1		scl0002692.1_59
Cul3	136.8	187.7	0.9994	1	16.1993	scl16567.16_128-S	NM_016716		scl16567.16_128
Mpp7	60.5	100	0.9963	0.9994	16.2016	scl15048.1.1_2-S	XM_128966		scl15048.1.1_2
Il28ra	65.3	171.2	0.9969	1	16.2093	scl0242700.9_212-S	NM_174851.2	CRF2-12;IFNLR1	scl0242700.9_212
9230105E10Rik	17.9	226.4	0.9719	1	16.2098	scl00319236.1_170-S	NM_175677		scl00319236.1_170
Rgs10	85.9	140.9	0.9988	1	16.2121	scl067865.1_323-S	NM_026418.1	2310010N19Rik	scl067865.1_323
Ttr	124.5	499.1	0.9994	1	16.2141	scl52209.6.1_16-S	NM_013697.1	prealbumin	scl52209.6.1_16
Cox10	417.8	529.2	1	1	16.2229	scl40083.7.1_85-S	NM_178379.2	2410004F01Rik	scl40083.7.1_85
Nsep1	3451.6	5043.4	1	1	16.2251	scl0002680.1_6-S	NM_011732.1	MSY1;Ybx1	scl0002680.1_6
Elmo2	37.2	61.6	0.9925	0.9975	16.2286	scl18334.24_243-S	NM_080287.2	1190002F24Rik;CED-12;mKIAA1834	scl18334.24_243
Htatsf1	536.8	702.4	1	1	16.2355	scl54915.11_540-S	NM_028242.1		scl54915.11_540
AA881470	178.5	230.1	1	1	16.2442	scl00231841.2_319-S	NM_181066.1		scl00231841.2_319
Mrps21	1597.7	2076.4	1	1	16.2624	scl066292.2_43-S	NM_078479.2	1810031B19Rik	scl066292.2_43
C730015P05Rik	28.5	45.6	0.9894	0.9956	16.2717	ri|C730015P05|PX00086J12|AK050106|1378-S	AK050106		ri|C730015P05|PX00086J12|AK050106|1378
2310066N05Rik	693.9	968.8	1	1	16.2837	scl0002028.1_25-S	NM_027371.1	2210420E24Rik;Rpf1	scl0002028.1_25
Stx18	118.3	162.3	0.9994	1	16.3114	scl27879.8.321_13-S	NM_026959.1	1810035L21Rik;4933425D03Rik	scl27879.8.321_13
4930500E24Rik	39	81.3	0.9938	0.9994	16.3292	scl40572.6_712-S	NM_030228	D0Jmb1;TU-71.1	scl40572.6_712
A030003A19Rik	7.3	37.3	0.879	0.9944	16.3296	scl42836.5.1_252-S	NM_173024.1		scl42836.5.1_252
Stambp	246.3	314.9	1	1	16.3319	scl28793.10_326-S	NM_024239.1	5330424L14Rik;5730422L11Rik;Amsh	scl28793.10_326
2600016B03Rik	134.5	179.5	0.9994	1	16.3358	scl34969.6.1_9-S	NM_026453.1		scl34969.6.1_9
Dtnb	639	858.5	1	1	16.3465	scl43441.25.1_42-S	NM_007886.1		scl43441.25.1_42
A930009M04Rik	224.7	291.2	1	1	16.3512	scl00320806.1_195-S	NM_177266.3		scl00320806.1_195
Atp6v0d1	902	1161.7	1	1	16.3606	scl011972.1_247-S	NM_013477.2	Ac39;Atp6d;P39;VATX;Vma6	scl011972.1_247
Tssc1	95.7	159.5	0.9994	1	16.3694	scl0002281.1_5-S	NM_201357.1		scl0002281.1_5
F2	11.7	60.8	0.9382	0.9969	16.3707	scl18994.12.1_7-S	NM_010168.1	Cf-2;Cf2;FII	scl18994.12.1_7
Dctn1	7.3	24	0.8765	0.9881	16.3719	scl0001146.1_6-S	NM_007835.1	Glued;p150	scl0001146.1_6
Catna1	960.6	1308.9	1	1	16.3763	scl012385.18_225-S	NM_009818.1	CTNNA1	scl012385.18_225
5133400O11Rik	65	91.8	0.9969	0.9994	16.3786	ri|C730033L13|PX00087I06|AK050281|2240-S	AK050281		ri|C730033L13|PX00087I06|AK050281|2240
Prpf3	355.3	513.2	1	1	16.3891	scl070767.1_256-S	NM_027541.2	3632413F13Rik	scl070767.1_256
Osr1	40.5	60	0.9944	0.9969	16.3907	scl35223.18_513-S	XM_135264.4		scl35223.18_513
Klra17	146.4	367.7	0.9994	1	16.395	scl28328.8.1_45-S	NM_133203	Ly-49Q;Ly49q1	scl28328.8.1_45
Kars	552.1	698.5	1	1	16.4024	scl34300.16.8_59-S	NM_053092.1	D8Wsu108e;mKIAA0070	scl34300.16.8_59
Fem1c	88.1	118.2	0.9994	0.9994	16.4097	scl0240263.2_0-S	NM_173423.1	3632443A22Rik;C330025H06;mKIAA1785	scl0240263.2_0
Notch4	258.8	376	1	1	16.4143	scl018132.31_78-S	NM_010929	Int-3;Int3	scl018132.31_78
1110032N12Rik	419.2	660.8	1	1	16.4176	scl0068730.1_249-S	NM_026824.2		scl0068730.1_249
1700011I11Rik	128.3	191.6	0.9994	1	16.4189	scl0075452.2_305-S	NM_029291.1	2610034L15Rik;FLJ21588	scl0075452.2_305
4833439L19Rik	256.6	328.2	1	1	16.4204	scl097820.1_227-S	NM_133797	4930558H15Rik;C81457	scl097820.1_227
BC003965	874.6	1234.7	1	1	16.4774	scl0214489.1_247-S	XM_128528.2		scl0214489.1_247
Nr1h3	23.5	45.4	0.9844	0.9956	16.4833	scl0003162.1_0-S	NM_013839.1	LXR;RLD1;Unr1	scl0003162.1_0
2310036I02Rik	40.3	62	0.9944	0.9975	16.4868	GI_38084344-S	XM_128950.4		GI_38084344
Cox5a	1372.9	2085.3	1	1	16.5094	scl36904.3.10_19-S	NM_007747		scl36904.3.10_19
Polr2i	292.5	386.5	1	1	16.5152	scl069920.4_5-S	XM_133304.4		scl069920.4_5
Hc	6.9	20.9	0.8671	0.9844	16.5165	scl19403.42.1_262-S	NM_010406.1	C5;He	scl19403.42.1_262
4732437J24Rik	68.5	94.2	0.9975	0.9994	16.5174	scl00214063.1_272-S	NM_172338.1	4732437J24;D030060M24;mKIAA0962	scl00214063.1_272
	41.4	76.1	0.9944	0.9994	16.5297	scl0001627.1_140-S	AK043907.1		scl0001627.1_140
Appbp1	506.7	691.1	1	1	16.534	scl0234664.3_26-S	NM_144931.1	59kDa;MGC29435;MGC36437;MGC36630	scl0234664.3_26
1110001J03Rik	851.7	1199.3	1	1	16.534	scl30187.2.1_182-S	NM_025363.2		scl30187.2.1_182
Ndufc1	1162.1	1594.2	1	1	16.5419	scl0066377.1_24-S	NM_025523.1	2310016K22Rik;KFYI	scl0066377.1_24
U2af1	297.2	391.7	1	1	16.5559	scl0108121.3_5-S	NM_024187	2010107D16Rik;35kDa	scl0108121.3_5
D030060M11Rik	368.3	468.7	1	1	16.5567	scl36998.11.1_88-S	NM_146000.1	MGC38070	scl36998.11.1_88
2210415M20Rik	60.1	85.4	0.9963	0.9994	16.5786	scl34002.14.1_30-S	NM_027338.1	1700010A24Rik	scl34002.14.1_30
E430030L01Rik	358.2	463.6	1	1	16.6017	ri|E430030L01|PX00100P23|AK088897|3500-S	AK088897		ri|E430030L01|PX00100P23|AK088897|3500
AF233884	47.9	69.1	0.9963	0.9988	16.6028	scl52512.21.3_17-S	NM_021315.1		scl52512.21.3_17
Myc	28	45.3	0.9888	0.9956	16.605	scl47871.3_2-S	NM_010849.2	84769;c-myc;Myc2;Niard;Nird	scl47871.3_2
Serpinf2	16.5	83.1	0.9669	0.9994	16.6125	scl018816.1_117-S	NM_008878.1	Pli;Serpimf2	scl018816.1_117
Snrpa1	296.6	441.6	1	1	16.617	scl000146.1_5-S	NM_021336.3	1500015N06Rik;MGC25531;MGC6298	scl000146.1_5
C9	-2	15.8	0.4311	0.9713	16.6177	scl48122.9.2_1-S	NM_013485.1		scl48122.9.2_1
Pigt	151.9	220.8	0.9994	1	16.6325	scl19937.12_3-S	NM_133779	4930534E15Rik;CGI-06	scl19937.12_3
D16Bwg1547e	396.7	514.7	1	1	16.6387	scl48576.14.1_37-S	NM_178069.2	5830465I20	scl48576.14.1_37
Bscl2	1348.9	1702.1	1	1	16.654	scl53403.26.13_76-S	NM_008144.3	2900097C17Rik;Gng3lg;seipin	scl53403.26.13_76
AW742319	2107.1	2656.1	1	1	16.6577	scl0057874.1_260-S	NM_021345.1	4930523M17Rik;B-ind1;Hspc121;MGC25483	scl0057874.1_260
Anp32a	515.8	654.6	1	1	16.6789	scl0011737.2_249-S	NM_009672.2	Anp32;I1PP2A;LANP;PHAP1;pp32	scl0011737.2_249
Got2	61.2	124.4	0.9963	1	16.6855	scl000715.1_17-S	NM_010325.1	FABP-pm;Got-2;mAspAT	scl000715.1_17
Ugcg	1210	1528.1	1	1	16.7049	scl25391.9_273-S	NM_011673	Epcs21;GlcT-1;Ugcgl	scl25391.9_273
Eps15-rs	539.3	684.3	1	1	16.7079	ri|9830168E22|PX00119B17|AK036728|3372-S	AK036728	9830147J04Rik;Eps15R	ri|9830168E22|PX00119B17|AK036728|3372
Ipo9	28.3	109.8	0.9888	0.9994	16.7095	scl00226432.1_235-S	XM_129442.3		scl00226432.1_235
Uqcrc2	1940	2517.7	1	1	16.7115	scl32119.15.11_22-S	NM_025899.1	1500004O06Rik;4930408O21Rik	scl32119.15.11_22
Nup205	712.1	1100.9	1	1	16.7163	scl30210.43.1_46-S	XM_133073.4		scl30210.43.1_46
Erdr1	209.3	667.7	1	1	16.7247	scl00170942.1_90-S	NM_133362.1	edr;MGC5764	scl00170942.1_90
Saa1	-5.6	135.6	0.1497	1	16.7411	scl020208.3_20-S	NM_009117.1	Saa-1	scl020208.3_20
Psma3	981.5	1418.7	1	1	16.7476	scl019167.11_85-S	NM_011184.2	Lmpc8	scl019167.11_85
Ddx18	838.5	1061.2	1	1	16.7633	scl066942.2_30-S	NM_025860	2310005B10Rik	scl066942.2_30
2410016O06Rik	639.9	859.7	1	1	16.7654	scl42993.1.28_269-S	NM_023633		scl42993.1.28_269
2510048O06Rik	3505.4	4419.4	1	1	16.7659	scl26959.5.1_79-S	NM_025624.1		scl26959.5.1_79
2610511O17Rik	85.5	131.5	0.9988	1	16.77	scl50495.21.3_143-S	NM_152817.2		scl50495.21.3_143
Nubp1	1483.3	1935.1	1	1	16.7905	scl026425.12_5-S	NM_011955.1		scl026425.12_5
Thoc3	155	212.3	0.9994	1	16.8074	scl43949.6.1_8-S	NM_028597.1	2410044K02Rik	scl43949.6.1_8
0610006I08Rik	363.2	481.6	1	1	16.8132	scl066836.1_32-S	NM_025791.1		scl066836.1_32
Ciapin1	534.6	975	1	1	16.8189	scl00109006.2_49-S	NM_134141.2		scl00109006.2_49
LOC381735	271.9	372.9	1	1	16.8231	GI_38082606-S	XM_355717.1		GI_38082606
Tmem39b	82.8	141.1	0.9988	1	16.8405	GI_40556283-S	NM_199305.1	6330509E05Rik;BC037095;MGC59407	GI_40556283
AI316787	264.9	339.9	1	1	16.8504	scl39882.5_436-S	NM_199199.1		scl39882.5_436
D11Wsu68e	449.2	571.7	1	1	16.8508	scl40889.7.141_9-S	NM_026776.3	1110020N13Rik	scl40889.7.141_9
Cdk4	422.2	735	1	1	16.8677	scl0003913.1_65-S	NM_009870.2	Crk3	scl0003913.1_65
Myg1	144.9	195.6	0.9994	1	16.8716	scl0002486.1_42-S	NM_021713.1	0610023A07Rik;2810433J21Rik;5830429P19Rik;Gamm1	scl0002486.1_42
Mkrn2	258	336.3	1	1	16.8873	scl29606.9_357-S	NM_023290.1	2610002L04Rik	scl29606.9_357
C77032	1288.2	2399	1	1	16.8941	scl45770.11.1_1-S	NM_153547.2	MGC46970;Ns	scl45770.11.1_1
0610007P22Rik	259.1	335.6	1	1	16.8969	scl000093.1_57_REVCOMP-S	NM_026676.1	1110014B11Rik	scl000093.1_57_REVCOMP
BC046331	110.1	180.3	0.9994	1	16.9027	scl00230967.2_306-S	NM_177673.2	A930027E11;MGC54921;mKIAA0562	scl00230967.2_306
Cdk10	21.8	40.1	0.9825	0.995	16.9122	scl00234854.1_10-S	NM_194444.1	BC017131	scl00234854.1_10
Kdelr2	309.4	425.1	1	1	16.9141	scl27015.4.1_35-S	NM_025841.1	1110007A14Rik	scl27015.4.1_35
0610007P14Rik	582.9	795	1	1	16.9301	scl42219.1_29-S	NM_021446		scl42219.1_29
Znrd1	1367.6	1729.9	1	1	16.9335	scl49941.4.1_39-S	NM_023162.3	1110014N07Rik;Rpa12	scl49941.4.1_39
2610318K02Rik	45.6	72.7	0.995	0.9994	16.9353	scl18868.1.64_1-S	NM_026519.1		scl18868.1.64_1
Slc15a2	174.8	301.6	1	1	16.9397	scl48500.22_173-S	XM_147213.1	8430408C16Rik;C78862;PEPT2	scl48500.22_173
1110039B18Rik	438.8	579.1	1	1	16.9416	scl0068796.2_313-S	NM_144525.2		scl0068796.2_313
Folr2	7.2	22.4	0.8759	0.9863	16.9526	scl30960.6.1_9-S	NM_008035	FBP2;Folbp-2;Folbp2;FR-P3	scl30960.6.1_9
Tbca	1593.1	2015	1	1	16.9687	scl021371.3_17-S	NM_009321.1		scl021371.3_17
Ppp1r14b	652.8	930.7	1	1	16.9698	GI_6679402-S	NM_008889.1	AOM172;PHI-1;PLCB3N;Png	GI_6679402
Cbfb	1637.9	2096.2	1	1	16.9778	scl33423.6_118-S	NM_022309.2	PEA2;Pebp2;PEBP2b;Pebpb2	scl33423.6_118
1190002C06Rik	219.8	291	1	1	16.9854	scl51921.9.1_53-S	NM_028447.1		scl51921.9.1_53
2610529H08Rik	97.5	132	0.9994	1	16.9886	ri|4933415P18|PX00020L06|AK016827|1222-S	AK016827		ri|4933415P18|PX00020L06|AK016827|1222
Igk-C	519.9	3035.6	1	1	17.0043	IGKV3-4_Y15968_Ig_kappa_variable_3-4_114-S	XM_132633.4		IGKV3-4_Y15968_Ig_kappa_variable_3-4_114
Zhx1	75.9	103.9	0.9975	0.9994	17.0091	scl0022770.2_174-S	NM_009572.2		scl0022770.2_174
G3bp	447.6	570.6	1	1	17.0326	scl0327932.4_310-S	NM_013716		scl0327932.4_310
D13Wsu64e	47.2	71.4	0.9956	0.9994	17.033	scl00217980.1_328-S	NM_172585.1	A630096F19	scl00217980.1_328
Lars	1228.1	1935.8	1	1	17.0643	scl51469.24.1_0-S			scl51469.24.1_0
Etf1	1231.7	1735.5	1	1	17.0668	scl51536.11_7-S	NM_144866.2	ERF;ERF1;MGC18745;SUP45L1;TB3-1	scl51536.11_7
Atox1	1672.6	2117	1	1	17.0687	scl40204.6.1_30-S	NM_009720.2	ATX1	scl40204.6.1_30
Tnf	30.9	50.8	0.9906	0.9963	17.0783	scl49991.4.1_137-S	NM_013693	DIF;TNF-alpha;Tnfa;TNFalpha;Tnfsf1a;TNFSF2	scl49991.4.1_137
Rab35	692.7	963.2	1	1	17.0835	scl077407.4_257-S	NM_198163.1		scl077407.4_257
Sephs2	63.8	95	0.9963	0.9994	17.0983	scl30651.1_27-S	NM_009266.1	Sps2;Ysg3	scl30651.1_27
Dexi	68	94.3	0.9975	0.9994	17.1176	scl058239.1_71-S	NM_021428.3	1810029J14Rik;D16Bwg0586e;Myle	scl058239.1_71
1810003N24Rik	267.1	457.1	1	1	17.126	scl40498.6_62-S	NM_025443.1		scl40498.6_62
Arl6	60.1	84.5	0.9963	0.9994	17.1389	GI_31980972-A	NM_019665.2	1110018H24Rik;2210411E14Rik	GI_31980972
Slco3a1	91.2	127.3	0.9994	1	17.1486	scl00108116.1_242-S	NM_023908.1	5830414C08Rik;Anr1;MJAM;OATP-D;Slc21a11	scl00108116.1_242
BC017647	195.8	253.8	1	1	17.1524	scl00216971.1_119-S	NM_145430.1	MGC28990	scl00216971.1_119
	41.7	63.7	0.9944	0.9975	17.161	9845300_4289-S			9845300_4289
Ap1s1	115.3	169.5	0.9994	1	17.1627	scl0004007.1_23-S	NM_007457.1	AP19	scl0004007.1_23
Negr1	10.5	51.4	0.9308	0.9969	17.168	scl0320840.6_19-S	NM_177274.2	5330422G01Rik;KILON;Ntra	scl0320840.6_19
Cyp2c70	15.1	131.9	0.9619	1	17.1917	scl52508.10.1_140-S	NM_145499.1		scl52508.10.1_140
Fbl	2164.3	2802.2	1	1	17.1932	scl014113.7_42-S	NM_007991.2	FIB;FLRN;RNU3IP1	scl014113.7_42
Mrps5	469.9	742.8	1	1	17.2119	scl0077721.2_286-S	NM_029963.2	1620401I16Rik	scl0077721.2_286
Arf2	529.8	752.5	1	1	17.2128	scl40837.7_339-S	NM_007477.2		scl40837.7_339
Rpl19	14161.4	17908	1	1	17.2155	scl019921.5_131-S	NM_009078		scl019921.5_131
E2f6	249.4	416.4	1	1	17.2212	scl0050496.2_252-S	NM_033270.1	EMA	scl0050496.2_252
9430023L20Rik	527.7	672.8	1	1	17.223	scl068118.3_287-S	NM_026566.1		scl068118.3_287
1700013A01Rik	76.3	107.4	0.9975	0.9994	17.2285	ri|1700013A01|ZX00036P08|AK005934|1139-S	AK005934		ri|1700013A01|ZX00036P08|AK005934|1139
Lmo4	1180.1	1497.4	1	1	17.2304	scl21429.6_290-S	NM_010723.2	A730077C12Rik;Crp3;Etohi4	scl21429.6_290
Ap2m1	673	897.2	1	1	17.2413	scl011773.12_241-S	NM_009679.1		scl011773.12_241
AU041707	730	928.7	1	1	17.2577	scl0102247.1_13-S	NM_018743.2		scl0102247.1_13
Lst1	1258.9	2243.5	1	1	17.2686	scl016988.2_22-S	XM_359281.1		scl016988.2_22
	217.8	290.1	1	1	17.2751	scl0002765.1_0-S	XM_355539.1		scl0002765.1_0
Spon2	269.8	473	1	1	17.2838	scl26719.6_100-S	NM_133903.2	2310045I24Rik;AI504350;M-spondin;Mindin	scl26719.6_100
Prkrip1	154.4	202.1	0.9994	1	17.284	scl0066801.1_114-S	NM_025774.1	8430424D23Rik;C114	scl0066801.1_114
Noc4	398.3	551.9	1	1	17.2987	scl000586.1_12-S	NM_010926.1		scl000586.1_12
1600019D15Rik	531.7	875.8	1	1	17.2994	scl0067878.2_53-S	NM_028975.2	2410089A21Rik;2700052H22Rik;5430406L04Rik;db83	scl0067878.2_53
LOC239770	0.7	23.2	0.6176	0.9881	17.3051	GI_38079916-S	XM_155903.2		GI_38079916
D230016N13Rik	8.5	23.6	0.9021	0.9881	17.3058	GI_38074319-S	XM_138506.5		GI_38074319
Tex14	8.9	66.4	0.9102	0.9981	17.3095	scl41086.32.1_0-S	NM_031386.1		scl41086.32.1_0
Pttg1ip	2766.7	3505.8	1	1	17.3142	scl38735.7_162-S	NM_145925.1		scl38735.7_162
Alg3	112.2	149.4	0.9994	1	17.3211	scl0001901.1_31-S	NM_145939	D16Ertd36e;MGC36684	scl0001901.1_31
Phc2	910.5	1183.2	1	1	17.325	scl24928.17_534-S	NM_018774.1	D4Ertd810e;Edr2;Mph2	scl24928.17_534
Hspd1	213.9	369	1	1	17.3264	scl015510.1_74-S	NM_010477.2	60kDa;Hsp60	scl015510.1_74
2610318N02Rik	120.6	235.7	0.9994	1	17.3285	scl0070458.2_200-S	NM_183287.1		scl0070458.2_200
4930504E06Rik	744	965.6	1	1	17.3341	scl075007.4_290-S	NM_133858.2	1810005H09Rik;cI-40;mKIAA1390;ni	scl075007.4_290
Metap1	443.9	591.3	1	1	17.3347	scl21464.11_314-S	NM_175224.2	1700029C17Rik	scl21464.11_314
Tubb5	1377.8	2269.7	1	1	17.3402	scl49975.4.297_19-S	NM_011655.2	B130022C14Rik;M(beta)5	scl49975.4.297_19
Sdpr	811.9	1033.1	1	1	17.3561	scl17984.2_572-S	NM_138741.1		scl17984.2_572
Eif4a1	50.8	83.5	0.9963	0.9994	17.3664	scl52692.1_233-S	NM_144958	BM-010;Ddx2a;Eif4	scl52692.1_233
Esd	1507.2	2227.9	1	1	17.3672	scl013885.9_29-S	NM_016903		scl013885.9_29
2310057H16Rik	32.3	70.3	0.9906	0.9994	17.3908	scl51825.4_405-S	NM_026473.2		scl51825.4_405
Sucla2	32.9	57.3	0.9906	0.9969	17.3963	scl075265.1_98-S	XM_127733.2		scl075265.1_98
Sara2	356.7	501.4	1	1	17.4099	scl41582.8.1_74-S	NM_025535.1	2310075M17Rik;2900019I22Rik;CMRD;SARA1B	scl41582.8.1_74
Hrmt1l3	115.2	155.7	0.9994	1	17.4115	scl32630.18_440-S	NM_133740.1	2010005E20Rik;2410018A17Rik;Prmt3	scl32630.18_440
Mrps16	556.2	710	1	1	17.4137	scl066242.2_14-S	NM_025440.1	1500011E11Rik;Mprs16	scl066242.2_14
2410011G03Rik	1051.7	1458.8	1	1	17.4232	scl27164.1.1_66-S	NM_025551.1	MGC7999	scl27164.1.1_66
1110014C03Rik	50.9	81.6	0.9963	0.9994	17.4241	scl068581.2_286-S	NM_026775.2	Tmp21	scl068581.2_286
Prdx1	2565.1	3254	1	1	17.4259	scl018477.6_2-S	NM_011034.2	MSP23;NkefA;OSF-3;PAG;Paga;PrxI;Tdpx2;TDX2;TPx-A	scl018477.6_2
Prp19	764.3	1019.8	1	1	17.4747	scl53365.18.1_112-S	NM_134129.2	D19Wsu55e;NMP200;PSO4;Snev	scl53365.18.1_112
B130053I10Rik	269.1	347.1	1	1	17.4822	ri|B130053I10|PX00158L15|AK045266|4352-S	AK045266		ri|B130053I10|PX00158L15|AK045266|4352
Mbp	431.2	693	1	1	17.4995	ri|A230090C03|PX00130I03|AK039047|4745-S	AK039047	golli-mbp;Hmbpr;mld;shi;shiverer	ri|A230090C03|PX00130I03|AK039047|4745
Degs	1078.1	1426.7	1	1	17.5122	scl013244.1_23-S	NM_007853.2	Mdes	scl013244.1_23
Ppp2ca	2763.3	3507.8	1	1	17.5182	scl41579.7_169-S	NM_019411.2		scl41579.7_169
Atp6v1c1	144.7	198	0.9994	1	17.5208	scl47965.12.3_6-S	NM_025494	1700025B18Rik	scl47965.12.3_6
Tbk1	643.2	917.6	1	1	17.5263	scl056480.1_127-S	NM_019786.2	1200008B05Rik	scl056480.1_127
Homer1	31.9	51.4	0.9906	0.9963	17.5344	scl44526.12_201-S	NM_152134.1	SYN47;Ves-1	scl44526.12_201
2410015M20Rik	255.7	342.5	1	1	17.5352	scl0224904.1_72-S	NM_153152.2	Qil1	scl0224904.1_72
Cops4	1009.4	1323.7	1	1	17.5664	scl026891.10_198-S	NM_012001.1	D5Ertd774e	scl026891.10_198
2700094K13Rik	270	379.5	1	1	17.5695	scl19073.3.3_4-S			scl19073.3.3_4
Rxrb	1165.5	1483.5	1	1	17.5756	scl020182.9_313-S	NM_011306.2	H-2RIIBP;Nr2b2;RCoR-1	scl020182.9_313
2410091C18Rik	61.6	98.6	0.9963	0.9994	17.5959	scl0001759.1_49-S	NM_028611.1	PRO1853	scl0001759.1_49
Idh3a	139.2	219.3	0.9994	1	17.608	scl36940.12_255-S	NM_029573.2	1110003P10Rik;1500012E04Rik	scl36940.12_255
Ube2g1	231.3	299.8	1	1	17.6085	scl067128.8_166-S	NM_025985.2	2700059C12Rik;AI256795;AU014992;D130023C12Rik	scl067128.8_166
2610028L19Rik	351.8	506.7	1	1	17.6102	scl52151.4.1_36-S	NM_027101.1	2310002G05Rik	scl52151.4.1_36
D030070L09Rik	79.4	111.7	0.9988	0.9994	17.611	scl0002259.1_36-S	NM_172625.1	D030070L09	scl0002259.1_36
Ppp1ca	1565.4	1991.2	1	1	17.6144	scl000041.1_12-S	NM_031868.1	dism2;Ppp1c	scl000041.1_12
Zfp639	607.3	864.7	1	1	17.6166	scl23294.9_553-S	NM_144519		scl23294.9_553
Dusp16	68.4	184.2	0.9975	1	17.6229	scl0001113.1_3351-S	NM_130447	3830417M17Rik;D6Ertd213e;MKP-7;MKP7	scl0001113.1_3351
D230025D16Rik	241.6	322.4	1	1	17.6328	scl33425.15_229-S	NM_145604.1		scl33425.15_229
Eef1g	14041.8	17821.2	1	1	17.6369	scl067160.10_33-S	NM_026007	2610301D06Rik;EF1G	scl067160.10_33
Vdac1	2683.1	3834.7	1	1	17.6412	scl022333.10_87-S	NM_011694	Vdac5	scl022333.10_87
Tgfbi	932	1229.9	1	1	17.6485	scl44710.17.1_26-S	NM_009369	68kDa;Beta-ig;big-h3	scl44710.17.1_26
Wdr4	14	29.7	0.9532	0.9906	17.6493	scl0001761.1_1-S	NM_021322.1	D530049K22Rik	scl0001761.1_1
Tsnax	1620	2061.1	1	1	17.652	scl33177.8_75-S	NM_016909.1	Trax	scl33177.8_75
Mrpl33	1229.6	1843.5	1	1	17.6578	scl066845.4_127-S	NM_025796.1	0610009M10Rik	scl066845.4_127
C630013N10Rik	486.5	644.6	1	1	17.6607	scl34704.4_282-S	NM_172052.1	MGC38024	scl34704.4_282
Cdc37l	73.3	107.1	0.9975	0.9994	17.679	scl0067072.1_237-S	NM_025950.1	2700033A15Rik;Harc	scl0067072.1_237
4833420N02Rik	85	132.6	0.9988	1	17.6994	scl41246.4.1_16-S	NM_183263.1		scl41246.4.1_16
Gpr83	52.8	78.3	0.9963	0.9994	17.7297	scl0014608.2_63-S	NM_010287.1	Gir;Gpr72;RP105;RP39;RP82	scl0014608.2_63
Eif3s2	1662.7	2187.3	1	1	17.7476	scl0002631.1_50-S	NM_018799.1	36kDa;D4Ertd632e;Trip1	scl0002631.1_50
Gfm	18.6	43.4	0.9757	0.9956	17.7493	scl23111.16.8_12-S	NM_138591.1	D3Wsu133e	scl23111.16.8_12
Drg1	1027.5	1398	1	1	17.7589	scl40603.7.49_6-S	NM_007879.1	Nedd3	scl40603.7.49_6
Tfpt	26.8	46.1	0.9888	0.9956	17.7643	scl000124.1_0-S	NM_023524.1	2400004F01Rik;Amida;FB1	scl000124.1_0
4930427A07Rik	32.9	61.9	0.9906	0.9975	17.7847	scl42718.7.1116_1-S	NM_134041.1	AA536649	scl42718.7.1116_1
LOC380625	406.6	522.5	1	1	17.7992	GI_38089453-S	XM_358378.1		GI_38089453
Rab8a	221.7	288.2	1	1	17.8091	scl0017274.1_278-S	NM_023126.2	Mel	scl0017274.1_278
Rnf144	114	199.6	0.9994	1	17.81	scl42588.12.910_0-S	NM_080563.2	Ubce7ip4;UIP4	scl42588.12.910_0
Paip1	98.5	154.9	0.9994	1	17.8107	scl44323.5.1_4-S	NM_145457.2		scl44323.5.1_4
Cdipt	1571.2	2002	1	1	17.8138	scl32044.6_195-S	NM_138754.1	9530042F15Rik;D7Bwg0575e;Pis;Pis1	scl32044.6_195
Polr3b	449.4	577.1	1	1	17.8406	scl070428.20_289-S	NM_027423.1		scl070428.20_289
Eif3s2	5116	6775.7	1	1	17.8571	scl23771.9.1_58-S	NM_018799.1	36kDa;D4Ertd632e;Trip1	scl23771.9.1_58
4930579A11Rik	45.2	78.8	0.995	0.9994	17.8636	scl0001344.1_14-S	NM_029478.2		scl0001344.1_14
Timm10	750.6	1180.9	1	1	17.8737	scl030056.1_208-S	NM_013896.2	Tim10a	scl030056.1_208
Ccm2	123.9	168	0.9994	1	17.8833	scl41854.11.8_46-S	NM_146014.1	MGC37115	scl41854.11.8_46
Wdr8	80.2	113.1	0.9988	0.9994	17.8865	scl24642.9.961_29-S	NM_021499.1	2610044M17Rik;5330425N03Rik;Dd57	scl24642.9.961_29
E430028B21Rik	95.9	160.8	0.9994	1	17.8965	scl00211948.2_4-S	NM_178668.3	E430028B21	scl00211948.2_4
0610007P22Rik	362.3	478.7	1	1	17.9033	scl000098.1_12-S	NM_026676.1	1110014B11Rik	scl000098.1_12
1110019J04Rik	1340.6	1880.9	1	1	17.9047	scl068512.1_6-S	XM_149430.3		scl068512.1_6
Ube1c	101.4	138.9	0.9994	1	17.9252	GI_6755920-S	NM_011666.1	AI256736;AI848246;AW546539;UBA3	GI_6755920
AU067744	780.8	1059.2	1	1	17.9293	scl00214505.2_7-S	NM_172529.1	6430527N14Rik;A830081F19;Mdcp1	scl00214505.2_7
C330008K14Rik	127.6	286.1	0.9994	1	17.9295	scl069326.1_76-S	XM_128979.4		scl069326.1_76
Eif4g2	37.1	62.5	0.9925	0.9975	17.9338	scl000210.1_44-S	NM_013507.2	DAP-5;Nat1;Natm1;p97	scl000210.1_44
1110007M04Rik	257.4	432.3	1	1	17.9538	scl0068493.2_155-S	NM_026742.1	3000003G13Rik	scl0068493.2_155
Dap3	244.6	364.4	1	1	17.9572	scl0001977.1_31-S	NM_022994.2	4921514D13Rik;DAP-3	scl0001977.1_31
A130065C13Rik	0.9	178.6	0.6232	1	17.9658	ri|A130065C13|PX00124A20|AK037935|681-S	AK037935		ri|A130065C13|PX00124A20|AK037935|681
Ube2g1	66.9	93.8	0.9975	0.9994	17.9747	scl0001439.1_101-S	NM_025985.2	2700059C12Rik;AI256795;AU014992;D130023C12Rik	scl0001439.1_101
Slc19a2	85.7	150.3	0.9988	1	17.9762	scl17283.6_608-S	NM_054087.1	DDA1;THTR1;TRMA	scl17283.6_608
Dctd	114.5	187.6	0.9994	1	17.9876	scl33833.8_84-S	NM_178788.2	6030466N05Rik	scl33833.8_84
Bhlhb9	174.4	229.7	1	1	17.9902	scl54620.5_512-S	NM_198161.1		scl54620.5_512
Sfxn1	750.6	1142.6	1	1	18.0034	scl0014057.2_277-S	NM_027324.2	2810002O05Rik;f	scl0014057.2_277
Fads2	20.2	44.5	0.9788	0.9956	18.0107	scl0056473.2_148-S	NM_019699.1	2900042M13Rik;Fadsd2	scl0056473.2_148
	289	385.2	1	1	18.0138	scl0001647.1_23-S	XM_128511.3		scl0001647.1_23
Rap2c	305.7	395.4	1	1	18.0321	scl54266.5_48-S	NM_172413.1	2010200P20Rik	scl54266.5_48
1110001C20Rik	47.4	69.9	0.9963	0.9994	18.0473	scl00242291.2_165-S	NM_177730.2	B230207P20	scl00242291.2_165
Rpp14	246.3	320.1	1	1	18.0572	scl46641.9_62-S	NM_025938.1	2610511E03Rik	scl46641.9_62
Rassf4	704.4	902.8	1	1	18.0845	scl00213391.1_239-S	NM_178045.3	3830411C14Rik;AD037	scl00213391.1_239
BC023823	65.9	144.7	0.9975	1	18.0883	scl24984.5.1_10-S	NM_153566.1	MGC38336	scl24984.5.1_10
Psmb7	1006.4	1341.2	1	1	18.0956	scl0003171.1_33-S	NM_011187.1	MC14	scl0003171.1_33
Cyp2a5	27.9	86.9	0.9894	0.9994	18.1301	scl0013087.2_75-S	NM_007812	Coh;Cyp15a2	scl0013087.2_75
Pecam1	1422.4	1901.3	1	1	18.1322	scl39433.17_301-S	NM_008816		scl39433.17_301
Sumo2	1161	1492.2	1	1	18.1366	scl0001373.1_2-S	NM_133354		scl0001373.1_2
Wdr36	116	172.1	0.9994	1	18.1404	scl52139.21.14_8-S	NM_144863		scl52139.21.14_8
Sdhb	379.2	524.9	1	1	18.1452	scl067680.5_8-S	NM_023374.3	0710008N11Rik	scl067680.5_8
Cd72	2384.6	3575.2	1	1	18.1495	scl012517.2_30-S	NM_007654.1	Ly-19;Ly-32;Ly-m19;Lyb-2	scl012517.2_30
Tagln2	778.1	997.3	1	1	18.1579	scl17197.4_15-S	NM_178598.1	2700094C18Rik;Sm22a;Sm22B;SM22beta	scl17197.4_15
Cept1	124	165.5	0.9994	1	18.1854	scl099712.1_51-S	NM_133869.2	9930118K05Rik	scl099712.1_51
D19Ertd678e	28.2	46.7	0.9888	0.9956	18.1893	scl52738.5_578-S	NM_023731	4933411H20Rik;6720480F16Rik	scl52738.5_578
D230004N01Rik	55.8	84	0.9963	0.9994	18.2022	ri|D230004N01|PX00187B24|AK051815|1580-S	AK051815		ri|D230004N01|PX00187B24|AK051815|1580
2010100O12Rik	1271.8	1649.4	1	1	18.2079	scl067067.1_49-S	NM_025946.2		scl067067.1_49
2810012G03Rik	354.7	458.4	1	1	18.2134	scl066306.4_122-S	NM_175104.3		scl066306.4_122
Ldb1	3868.3	4937.6	1	1	18.216	scl52415.12_0-S	NM_010697.1	CLIM2;NLI	scl52415.12_0
	568.1	1527.3	1	1	18.2391	IGHV8S7_U23022_Ig_heavy_variable_8S7_163-S			IGHV8S7_U23022_Ig_heavy_variable_8S7_163
Ust	124.1	165.7	0.9994	1	18.2496	scl38227.11_29-S	NM_177387		scl38227.11_29
Uap1	146	305.6	0.9994	1	18.2539	scl15961.15.1_3-S	NM_133806.2	AgX;AGX-1;AGX-2;AGX1;ESTM38;SPAG2	scl15961.15.1_3
Irf3	1372.1	1755.5	1	1	18.2557	scl32698.6.1_30-S	NM_016849.2	C920001K05Rik	scl32698.6.1_30
Ptbp1	583.9	762.4	1	1	18.2582	scl0019205.2_0-S	NM_008956.1	HNRPI;pPTB;Ptb;PTB-1;PTB2;PTB3;PTB4	scl0019205.2_0
Pfn1	3588.7	4912.3	1	1	18.2821	scl018643.4_21-S	NM_011072.2	Pfn	scl018643.4_21
M6pr	360.2	465.7	1	1	18.2923	scl017113.8_48-S	NM_010749.4	CD-MPR;Mpr46	scl017113.8_48
Pygo2	1239.1	1586.6	1	1	18.3047	scl068911.1_313-S	XM_130932.5		scl068911.1_313
Dctn4	496.9	643	1	1	18.306	scl0067665.1_200-S	NM_026302.2	1110001K06Rik;4930547K17Rik;p62	scl0067665.1_200
Cxcl4	17.7	53.4	0.9719	0.9969	18.3063	scl27602.3.1_69-S	NM_019932.1	Pf4;Scyb4	scl27602.3.1_69
Ckb	1794	2469.6	1	1	18.3487	scl0012709.2_191-S	NM_021273.2	Ck-3	scl0012709.2_191
Frag1	24.1	98.7	0.985	0.9994	18.3604	scl000187.1_133-S	NM_145583.1		scl000187.1_133
Nsdhl	271.8	364.9	1	1	18.3638	scl018194.8_27-S	NM_010941.3	Bpa;H105E3;Str;XAP104	scl018194.8_27
Emp3	2522.2	3226.4	1	1	18.4031	scl31356.7.1_27-S	NM_010129	H-4;H4;HNMP-1;MI-35;Ymp	scl31356.7.1_27
BC002199	689.6	968.6	1	1	18.4242	scl11702.1.1_1-S	NM_145964.1	MGC7434	scl11702.1.1_1
Suclg1	264.9	369.2	1	1	18.4254	scl0001102.1_1-S	NM_019879.1	1500000I01Rik;Sucla1	scl0001102.1_1
BC019806	302.3	445.8	1	1	18.4295	scl0218885.8_148-S	NM_145460	2410002F01Rik;MGC30933	scl0218885.8_148
Elovl1	138.8	210.1	0.9994	1	18.4376	scl0002782.1_72-S	NM_019422	Ssc1	scl0002782.1_72
6330414G02Rik	67.3	188	0.9975	1	18.4402	scl6267.1.1_133-S			scl6267.1.1_133
D19Bwg1357e	1254.2	1665.9	1	1	18.4473	scl52614.18.1_13-S	NM_177474.2	1110069H02Rik	scl52614.18.1_13
4733401H18Rik	649.4	835.5	1	1	18.4568	scl0066706.2_314-S	NM_023247.1		scl0066706.2_314
Ndufs4	176.7	257.8	1	1	18.4703	scl017993.1_123-S	NM_010887.1	C1-18k	scl017993.1_123
Cxcl14	-2.3	16.1	0.4092	0.9763	18.4795	scl43911.4.1_38-S	NM_019568.1	1110031L23Rik;1200006I23Rik;BMAC;bolekine;BRAK;Kec;KS1;MIP-2g;NJAC;Scyb14	scl43911.4.1_38
2410003K15Rik	339.2	439.7	1	1	18.4797	GI_38084253-S	XM_132537.3		GI_38084253
Dhx30	1046.4	1343.4	1	1	18.5327	scl35324.20.1_127-S	NM_133347.1	2810477H02Rik;C130058C04Rik;Ddx30;HELG	scl35324.20.1_127
Ppt2	1252.8	1615	1	1	18.5453	scl054397.1_307-S	NM_019441	0610007M19Rik;AA672937	scl054397.1_307
Farsla	365.8	518.8	1	1	18.5479	scl066590.10_12-S	NM_025648	0610012A19Rik	scl066590.10_12
Nmt1	1650.6	2253.6	1	1	18.5566	scl40850.12.1_163-S	NM_008707.2		scl40850.12.1_163
2900073G15Rik	100.5	136.5	0.9994	1	18.5635	scl067268.1_40-S	NM_026064.1		scl067268.1_40
Tpm4	318.5	498	1	1	18.5759	scl00326618.1_92-S	XM_134274.3		scl00326618.1_92
Plscr1	215.2	299.8	1	1	18.5819	scl022038.3_2-S	NM_011636.1	MmTRA1a;MmTRA1b;MuPLSCR2;NOR1;TRA1;Tras1;Tras2	scl022038.3_2
Glb1	178.7	237.7	1	1	18.5884	scl0012091.2_274-S	NM_009752.1	Bge;Bgl;Bgl-e;Bgl-s;Bgl-t;Bgs;Bgt	scl0012091.2_274
Wrb	134	178.9	0.9994	1	18.6221	scl48836.8_442-S	NM_207301.1	5530402J05Rik;C030018G21Rik;Chd5	scl48836.8_442
Frag1	55.4	92.3	0.9963	0.9994	18.6387	scl32282.14.1_19-S	NM_145583.1		scl32282.14.1_19
AI747699	166	219.5	1	1	18.6398	GI_85701463-I	NM_001013770.1		GI_85701463
Tceb2	2423.4	3152.2	1	1	18.6398	scl067673.2_0-S	NM_026305.1	0610040H15Rik	scl067673.2_0
2610012O22Rik	365.9	604.7	1	1	18.6407	scl069902.2_6-S	NM_023536	Mg684	scl069902.2_6
1500002M01Rik	113.6	153.1	0.9994	1	18.6424	scl39416.15_560-S	NM_133702.1		scl39416.15_560
Phf11	23.2	41	0.9844	0.9956	18.6504	scl0219131.1_319-S	NM_172603.1	4933417L10;4933417L10Rik	scl0219131.1_319
Ms4a6d	201.2	1017.6	1	1	18.6883	scl064382.1_42-S	NM_026835.1	1110058E16Rik	scl064382.1_42
Hrb	85.8	118.1	0.9988	0.9994	18.7113	scl000917.1_27-S	NM_010472.1	C130049H11Rik;D730048C23Rik;RAB;Rip	scl000917.1_27
Igh-1a	3223.2	6225.8	1	1	18.7119	IGHG2C_J00479_Ig_heavy_constant_gamma_2C_715-S	XM_354704.1		IGHG2C_J00479_Ig_heavy_constant_gamma_2C_715
AB041568	59.1	118.7	0.9963	0.9994	18.7367	ri|F830033L24|PL00007A19|AK089856|4767-S	AK089856		ri|F830033L24|PL00007A19|AK089856|4767
Irak3	242.9	377.2	1	1	18.7517	scl37440.14_650-S	NM_028679.2	4833428C18Rik;IRAK-M	scl37440.14_650
Ccdc9	684.4	882.5	1	1	18.7608	scl0243846.1_330-S	NM_172297.1	2600011L02Rik	scl0243846.1_330
Alg5	329.1	441.2	1	1	18.7609	scl0002086.1_57-S	NM_025442.1	1500026A19Rik;2600005J22	scl0002086.1_57
1110017C15Rik	165.1	229.3	1	1	18.7724	scl066164.1_0-S	NM_025391		scl066164.1_0
2410042D21Rik	22.7	41.8	0.9832	0.9956	18.7797	scl0003391.1_153-S	NM_024254.2		scl0003391.1_153
Nsep1	8938.2	11533.4	1	1	18.7807	scl0022608.1_233-S	NM_011732.1	MSY1;Ybx1	scl0022608.1_233
Trap1	759.1	1173.2	1	1	18.7852	scl48818.18.1_43-S	NM_026508.1		scl48818.18.1_43
Stk19	120.8	162.5	0.9994	1	18.8012	scl0001620.1_1-S	NM_019442.2	G11;RP1	scl0001620.1_1
BC030183	42.1	84	0.9944	0.9994	18.8039	scl23772.3.1_23-S	NM_182783.1		scl23772.3.1_23
2410166I05Rik	31.1	71.1	0.9906	0.9994	18.8128	scl23686.4_28-S	NM_029759.2		scl23686.4_28
Dncic2	589.8	827.8	1	1	18.8593	scl20807.21.1_18-S	NM_010064	3110079H08Rik	scl20807.21.1_18
Mrps10	220.1	302.1	1	1	18.87	scl064657.6_146-S	NM_183086	1110038B19Rik;Rpms10	scl064657.6_146
Ate1	461.1	597.2	1	1	18.8749	scl30601.15_186-S	NM_013799.2		scl30601.15_186
LOC209405	53.4	83.4	0.9963	0.9994	18.8768	GI_38093939-S	XM_142315.2		GI_38093939
Cdkn1a	65.4	92.8	0.9969	0.9994	18.8832	scl0012575.2_206-S	NM_007669.2	CAP20;CDKI;Cdkn1;CIP1;mda6;P21;p21Cip1;p21WAF;SDI1;Waf1	scl0012575.2_206
LOC232606	467.1	622.4	1	1	18.9114	GI_38083743-S	XM_124826.2		GI_38083743
6720407G21Rik	21.1	49.5	0.98	0.9956	18.9119	scl0077733.1_129-S	XM_133272		scl0077733.1_129
Commd3	414.7	538.1	1	1	18.9182	GI_31981946-A	NM_147778.2	AW550818;Bup;D2Ertd542e	GI_31981946
Bcap29	156.5	235.2	1	1	18.9224	scl42558.9_151-S	NM_007530.2	Bap29	scl42558.9_151
2700024D06Rik	20.4	44	0.9782	0.9956	18.9258	ri|2700024D06|ZX00063G09|AK076051|1851-S	AK076051		ri|2700024D06|ZX00063G09|AK076051|1851
2700092H06Rik	372.3	483.8	1	1	18.9319	scl078325.1_150-S	XM_132529.2		scl078325.1_150
Nupl2	71	112.2	0.9975	0.9994	18.9349	scl00231042.2_225-S	NM_153092.1	AV116043;CG1;NLP-1;Nlp1	scl00231042.2_225
Nol5a	311.2	452.2	1	1	18.938	scl067134.7_2-S	NM_024193.1	2310044F10Rik;NOP56	scl067134.7_2
Ppp4c	1539.4	1980.3	1	1	18.9381	scl30672.9.1_29-S	NM_019674.2	1110002D08Rik;AU016079;Ppx	scl30672.9.1_29
2610101N10Rik	304.9	464.6	1	1	18.9398	scl0067958.1_275-S	NM_026476.1		scl0067958.1_275
2700023B17Rik	358.7	466.4	1	1	18.9465	scl31481.11_594-S	NM_025948.1		scl31481.11_594
Nudt5	320	561.5	1	1	18.9477	scl21320.10.1_37-S	NM_016918.2		scl21320.10.1_37
Ncf2	359	466.8	1	1	18.9519	scl017970.15_30-S	NM_010877	Ncf-2;NOXA2;p67phox	scl017970.15_30
2610028L19Rik	252.7	369.9	1	1	18.9613	scl0002238.1_5-S	NM_027101.1	2310002G05Rik	scl0002238.1_5
Fbxo28	218.6	287.3	1	1	18.9741	scl0067948.1_302-S	NM_175127.1		scl0067948.1_302
1110038B12Rik	574.5	863.3	1	1	19.0076	scl068763.4_12-S	XM_359415.1		scl068763.4_12
Ard1	479.3	721.1	1	1	19.1075	scl0002876.1_12-S	NM_019870.1	2310039H09Rik;Te2	scl0002876.1_12
Adprh	771.2	1015.6	1	1	19.1134	scl011544.1_20-S	NM_007414.2	Arh1	scl011544.1_20
Psmb6	1820.1	2405.1	1	1	19.1201	scl019175.6_47-S	NM_008946	Lmp19;Mpnd	scl019175.6_47
Cdkal1	49.9	73.8	0.9963	0.9994	19.1209	scl0068916.1_226-S	NM_144536.1	1190005B03Rik;6620401C13Rik	scl0068916.1_226
Banf1	1256.5	1701.9	1	1	19.1632	scl000538.1_65-S	NM_011793.2	BAF;Bcrp1	scl000538.1_65
Rap1gds1	451	606.7	1	1	19.1929	scl0229877.2_148-S	NM_145544	GDS1;MGC18981	scl0229877.2_148
Rdh11	319.7	464.6	1	1	19.2038	scl42308.7_397-S	NM_021557	2610319N22Rik;Arsdr1;CGI-82;HCBP12;M42C60;Mdt1;Psdr1;SCALD	scl42308.7_397
Mif	2478	3372.9	1	1	19.2129	scl017319.2_13-S	XM_147409.1	GIF;Glif	scl017319.2_13
Dctn3	637.3	907.5	1	1	19.2226	scl24417.1.36_21-S	NM_016890.2	p24	scl24417.1.36_21
Ndufa10	1552.7	2260.3	1	1	19.2418	scl0067273.2_276-S	NM_024197.1	2900053E13Rik	scl0067273.2_276
Rps24	85.6	132.2	0.9988	1	19.2601	scl0020088.2_249-S	NM_011297.2		scl0020088.2_249
4930584N22Rik	14.1	33.6	0.9526	0.9931	19.2805	scl000025.1_30-S	NM_026654.1	4933424D16Rik	scl000025.1_30
Aatf	610.5	791.5	1	1	19.3156	scl39808.15.1_10-S	NM_019816.1	4933415H02Rik;5830465M17Rik;Che-1;MGC35916;Trb	scl39808.15.1_10
Lrrc5	468.5	609.1	1	1	19.3223	scl27491.7_248-S	NM_178701.2	4930525N13Rik;A930019F03	scl27491.7_248
Bclp2	3.9	19	0.781	0.9807	19.335	scl0386606.2_29-S	NM_170594.1		scl0386606.2_29
Dusp19	29.8	54	0.9894	0.9969	19.3619	scl068082.4_12-S	NM_024438.2	5930436K22Rik;SKRP1;TS-DSP1	scl068082.4_12
9830109N13Rik	37.7	61.1	0.9931	0.9975	19.3871	scl0004035.1_105-S	NM_145414.1	AI326939;Wbscr20	scl0004035.1_105
2610319K07Rik	212.3	307.3	1	1	19.3889	scl25655.8_229-S	NM_028264.2		scl25655.8_229
LOC382063	3347.6	4671.1	1	1	19.389	GI_38089740-S	XM_356143.1		GI_38089740
Ppm1a	200	264.6	1	1	19.4127	scl019042.1_95-S	NM_008910.2	2900017D14Rik;MMPa-2;MPPa-1	scl019042.1_95
A530060O05Rik	5	21.5	0.8235	0.9844	19.4165	ri|A530060O05|PX00142P09|AK080098|1579-S	AK080098		ri|A530060O05|PX00142P09|AK080098|1579
Clpp	638.1	889.6	1	1	19.4374	scl50582.4.1_9-S	NM_017393	D17Wsu160e	scl50582.4.1_9
Syncrip	61.6	105.5	0.9963	0.9994	19.4415	scl0003472.1_28-S	NM_019666.1	2610109K23Rik;4632417O19Rik;GRY-RBP;Nsap1;Nsap1l;pp68	scl0003472.1_28
Rnf34	515.7	670.5	1	1	19.4563	scl080751.6_5-S	NM_030564.1	BC004042;MGC7670;RIFF	scl080751.6_5
Psmc5	581.1	781.4	1	1	19.4793	scl0001433.1_54-S	NM_008950.1	mSUG1	scl0001433.1_54
Mcm6	5.9	70.5	0.8341	0.9994	19.4921	scl16333.16_85-S	NM_008567.1	ASP-l1;D1Wsu22e;Mcmd6	scl16333.16_85
Cxcl14	0.8	46.6	0.6213	0.9956	19.5081	scl0057266.1_102-S	NM_019568	1110031L23Rik;1200006I23Rik;BMAC;bolekine;BRAK;Kec;KS1;MIP-2g;NJAC;Scyb14	scl0057266.1_102
LOC382058	30.8	66.7	0.9906	0.9981	19.5321	GI_38089675-S	XM_356133.1		GI_38089675
Zswim1	290.9	391.3	1	1	19.5376	scl19923.3_605-S	NM_028028.2	2410003H12Rik	scl19923.3_605
Cdk4	32.6	59.6	0.9906	0.9969	19.5415	scl38333.7.174_81-S	NM_009870.2	Crk3	scl38333.7.174_81
Slfn2	267.3	351.3	1	1	19.5559	scl41148.2_393-S	NM_011408.1	Shlf2	scl41148.2_393
Vav1	1325.1	1714.1	1	1	19.5587	scl50576.26.1_29-S	NM_011691.2	Vav	scl50576.26.1_29
Lrrc28	108.6	149.7	0.9994	1	19.5662	scl31224.16_382-S	NM_175124.3		scl31224.16_382
Prdx5	154.4	206.5	0.9994	1	19.5683	scl000502.1_59-S	NM_012021.1	AOEB166;AOPP;Pmp20;Prdx6;PrxV	scl000502.1_59
Hsd11b1	1074.3	1494	1	1	19.5987	scl015483.1_7-S	NM_008288		scl015483.1_7
Cd52	22.6	214.1	0.9838	1	19.6137	scl023833.2_2-S	NM_013706	B7;CAMPATH-1;CLS1;MB7	scl023833.2_2
D1Ertd251e	159.2	217.3	1	1	19.6343	scl17258.8_12-S	NM_030245.2	2900026B15Rik;Staf42	scl17258.8_12
Map2k2	741.1	990.7	1	1	19.6346	scl38665.9.1_23-S	NM_023138.3	MEK2;MK2;Prkmk2	scl38665.9.1_23
AI854876	856.3	1215.9	1	1	19.6382	scl00233875.2_247-S	NM_153580.1	MGC31515	scl00233875.2_247
Banf1	740	960.7	1	1	19.6405	scl0023825.1_1-S	NM_011793.2	BAF;Bcrp1	scl0023825.1_1
1810009A15Rik	653.5	895.2	1	1	19.6422	scl066276.2_21-S	NM_025463.1		scl066276.2_21
AW046396	278.2	425.4	1	1	19.6687	scl0329173.1_142-S	NM_177836.2	6530425B06	scl0329173.1_142
E2f3	68.7	105.8	0.9975	0.9994	19.6712	scl44141.9.1_18-S	XM_127250.4		scl44141.9.1_18
AW011752	1099.9	1440.3	1	1	19.6851	scl41755.17_597-S	NM_134034	mKIAA1387	scl41755.17_597
Nup107	101.5	139.3	0.9994	1	19.7039	scl0103468.2_2-S	NM_134010.1		scl0103468.2_2
AI597468	51.3	76.1	0.9963	0.9994	19.7075	GI_61557490-S	NM_001013028.1		GI_61557490
Hnrpc	4748.4	6135.9	1	1	19.7261	scl0015381.1_237-S	NM_016884.1	D14Wsu171e;hnrnp-C;Hnrnpc;hnRNPC1;hnRNPC2;Hnrpc1;Hnrpc2	scl0015381.1_237
LOC213411	313.2	452.4	1	1	19.739	GI_38085321-S	XM_124808.2		GI_38085321
1500011H22Rik	20.3	38.4	0.9788	0.9944	19.7489	scl26077.1_53-S	NM_026883		scl26077.1_53
Scp2	97.9	148.6	0.9994	1	19.7595	scl020280.7_0-S	NM_011327.1	ns-LTP;NSL-TP;SCP-2;SCPx	scl020280.7_0
1190028F09	32.3	81.2	0.9906	0.9994	19.76	scl0330481.1_5-S			scl0330481.1_5
Taf12	675.9	947.6	1	1	19.767	scl0002627.1_6-S	BC019668	20kDa;2810422D08Rik;Taf2J	scl0002627.1_6
Gp6	17.7	60.5	0.9713	0.9975	19.7987	scl31821.8.1_20-S	XM_145298.2		scl31821.8.1_20
Mrvi1	207.9	360.1	1	1	19.8101	scl30807.22.1_70-S	NM_194464.1		scl30807.22.1_70
Spnr	747.7	972.3	1	1	19.8416	ri|1700024P20|ZX00050F10|AK006314|744-S	AK006314		ri|1700024P20|ZX00050F10|AK006314|744
Frag1	40.4	67.7	0.9944	0.9981	19.8472	scl00233575.1_0-S	NM_145583.1		scl00233575.1_0
1700020M16Rik	138.4	186.6	0.9994	1	19.8505	scl45364.8.1_112-S	XM_127811.4		scl45364.8.1_112
3110001D03Rik	1424.3	1862.1	1	1	19.8509	scl24219.2.1_21-S	NM_025849.2	1700027K24Rik	scl24219.2.1_21
2610042O14Rik	133.2	201.9	0.9994	1	19.8662	scl0066460.1_267-S	NM_025575.1		scl0066460.1_267
Appbp2	414.4	542.1	1	1	19.8907	scl0066884.2_148-S	NM_025825.2	1300003O07Rik;mKIAA0228;PAT1	scl0066884.2_148
C77668	581.5	758.3	1	1	19.9468	scl0229543.1_170-S	NM_145540.2		scl0229543.1_170
Ywhag	3026.9	3922	1	1	19.999	scl25917.6_37-S	NM_018871.2	D7Bwg1348e	scl25917.6_37
Lrrfip2	54.2	80	0.9963	0.9994	20.024	scl0003511.1_1-S	XM_284541.1		scl0003511.1_1
LOC381820	73.9	104.8	0.9975	0.9994	20.0371	GI_38085360-S	XM_355822.1		GI_38085360
1810004F21Rik	964.5	1254.6	1	1	20.068	scl45769.2.281_2-S	NM_026911.1		scl45769.2.281_2
LOC381379	68	97.4	0.9975	0.9994	20.081	GI_38074915-S	XM_355343.1		GI_38074915
Rpl29	374.8	843.7	1	1	20.0951	scl019944.1_21-S	NM_009082.2	Rpl43	scl019944.1_21
Josd3	67.1	108.8	0.9975	0.9994	20.1044	GI_21312925-I	NM_029248.1	2810003M17Rik;4930553M18Rik;5930426I11Rik;MGC117821	GI_21312925
Prg	82.8	117.6	0.9988	0.9994	20.1101	scl0003786.1_57-S	NM_011157.1	Sgc	scl0003786.1_57
Nfkbiz	151.7	340.9	0.9994	1	20.1134	scl48393.15_330-S	NM_030612		scl48393.15_330
2410005K20Rik	427.3	614.2	1	1	20.1149	scl48754.10.1_30-S	NM_025546.1		scl48754.10.1_30
Dtnbp1	437.2	572.6	1	1	20.1256	scl44037.11.1_29-S	NM_025772.3	5430437B18Rik;dysbindin;sdy	scl44037.11.1_29
Map3k8	144.6	196.7	0.9994	1	20.1489	scl51698.9_140-S	NM_007746.1	c-COT;Cot;Est;Estf;Tpl-2;Tpl2	scl51698.9_140
Nsf	867.3	1129.6	1	1	20.1557	scl39472.24_150-S	NM_008740.2	SKD2	scl39472.24_150
Rtn3	227.9	302.2	1	1	20.1582	scl020168.1_23-S	NM_001003930		scl020168.1_23
Eif2b1	110.5	177.6	0.9994	1	20.2005	scl0003953.1_5-S	NM_145371.1	26kDa;EIF2B;EIF2BA;MGC6458	scl0003953.1_5
Hp	638.2	1275.8	1	1	20.2011	scl34345.7_19-S	NM_017370.1		scl34345.7_19
Coq6	378	515	1	1	20.2058	scl42976.13.1_6-S	NM_172582.1	5930427M12Rik	scl42976.13.1_6
Rragc	842.4	1097.9	1	1	20.2121	scl054170.29_181-S	NM_017475	Gtr2;MGC47404;RAGC;TIB929;YGR163W	scl054170.29_181
1500032H18Rik	259.8	344.6	1	1	20.2232	scl16852.5.1_12-S	XM_129802.2		scl16852.5.1_12
AA959742	201.8	271.9	1	1	20.2272	scl000075.1_18_REVCOMP-S	NM_133807.1		scl000075.1_18_REVCOMP
Catsper2	28.1	48	0.9888	0.9956	20.2468	scl0212670.1_0-S	NM_153075.1		scl0212670.1_0
Maml1	617.4	806.8	1	1	20.2613	scl40273.5_591-S	NM_175334.2	AI644666;D930008C07Rik;Mam-1;Mam1;mKIAA0200	scl40273.5_591
Hrb2	29.2	53.7	0.9894	0.9969	20.2751	scl0003784.1_7-S	NM_178610.2	2610511F02Rik;D10Ertd773e	scl0003784.1_7
2310008H09Rik	130	186.3	0.9994	1	20.2782	scl066356.1_13-S	NM_023197.1	Tsg118	scl066356.1_13
B130015M16Rik	708.1	924.4	1	1	20.2852	ri|B130015M16|PX00157I04|AK044956|2746-S	AK044956		ri|B130015M16|PX00157I04|AK044956|2746
Gorasp2	411.8	540.5	1	1	20.2858	scl20812.9.574_16-S	NM_027352.2	0610011A07Rik;2410043M02Rik;5730520M13Rik;9430094F20Rik;GOLPH2;GRASP55;GRS2;p59	scl20812.9.574_16
B130016L12Rik	1308.4	1702.7	1	1	20.2901	scl45065.22.7_66-S	NM_144835.3		scl45065.22.7_66
Nlk	121	165.1	0.9994	1	20.2999	scl0018099.2_232-S	NM_008702.2		scl0018099.2_232
Psma4	794.2	1138.5	1	1	20.3048	scl026441.8_13-S	NM_011966	C9	scl026441.8_13
Fnta	904.9	1179.8	1	1	20.3122	scl34985.11_48-S	NM_008033.2	FTA	scl34985.11_48
0610007H07Rik	1647.9	2144	1	1	20.3488	scl38374.10.1_58-S	NM_026617.1		scl38374.10.1_58
Dolpp1	252.6	364.7	1	1	20.3502	scl21089.8_496-S	NM_020329.1	0610011H20Rik;AB030189;LSFR2	scl21089.8_496
A230055O06Rik	468.7	614.6	1	1	20.3503	ri|A230055O06|PX00128O05|AK038696|2491-S	AK038696		ri|A230055O06|PX00128O05|AK038696|2491
Ndel1	904.2	1179.3	1	1	20.3617	scl40050.12_410-S	NM_023668.1	2600006O07Rik;NudeL	scl40050.12_410
Ppp1ca	1985.5	2650.7	1	1	20.3759	scl000045.1_44_REVCOMP-S	NM_031868.1	dism2;Ppp1c	scl000045.1_44_REVCOMP
Bnip2	423.6	556.2	1	1	20.3774	GI_56606147-A	NM_001008238.1	5730523P12Rik;BNIP2beta;Nip21	GI_56606147
Nipsnap3b	144.3	208.5	0.9994	1	20.3903	scl0002709.1_68-S	NM_025623.1	2700063N13Rik	scl0002709.1_68
D10Ertd214e	58.7	86	0.9963	0.9994	20.3963	scl37827.3_399-S	NM_134007.2		scl37827.3_399
BC003885	179	259.9	1	1	20.4027	scl00225215.1_56-S	NM_198609		scl00225215.1_56
4930584N22Rik	119	165.4	0.9994	1	20.424	scl068276.1_0-S	NM_026654.1	4933424D16Rik	scl068276.1_0
Slc19a1	196.2	361.4	1	1	20.4669	scl020509.5_60-S	NM_031196.1	RFC;RFC-1;RFC1	scl020509.5_60
Cdc20	149.3	294	0.9994	1	20.4685	scl0107995.10_1-S	NM_023223.1	2310042N09Rik;p55CDC	scl0107995.10_1
	0.9	23.3	0.6288	0.9881	20.5071	NeoR-S			NeoR
Tcp1	22.4	41.8	0.9832	0.9956	20.5131	scl0001621.1_13-S	NM_013686	c-cpn;CCT;Cct1;Ccta;p63;Tcp-1;Tp63;TRic	scl0001621.1_13
Atp5b	8727.1	12369.4	1	1	20.5396	scl38298.13.28_46-S	NM_016774.2		scl38298.13.28_46
Mef2a	76.6	140.7	0.9981	1	20.5496	scl31226.15_497-S	NM_013597	A430079H05Rik	scl31226.15_497
1810008O21Rik	806.3	1102.8	1	1	20.5607	scl33050.3.1_15-S	XM_485868		scl33050.3.1_15
Wdr1	499.5	752.8	1	1	20.5713	scl26663.16_246-S	NM_011715.1	D5Wsu185e	scl26663.16_246
Hnrpa0	29.6	71.8	0.9894	0.9994	20.5736	scl077134.2_4-S			scl077134.2_4
Ugalt2	1979.8	2584.7	1	1	20.6153	scl41012.9.1_84-S	NM_016752.1		scl41012.9.1_84
Mrps24	2144.3	2932.9	1	1	20.666	scl064660.1_30-S	NM_026080.1	3110030K20Rik;Rpms24	scl064660.1_30
1810060D16Rik	767.2	1157.3	1	1	20.6846	scl47751.3.4_1-S	XM_128110.3		scl47751.3.4_1
Defcr-rs2	9.7	26.4	0.9177	0.99	20.6931	GI_6681168-S	NM_007847.1	CRS4C;CRS4C-1;Defcr-rs3	GI_6681168
Ppp6c	989	1293.1	1	1	20.7186	scl0067857.2_151-S	NM_024209.1	2310003C10Rik	scl0067857.2_151
Vcp	3299.2	4301.3	1	1	20.7826	scl0269523.2_3-S	NM_009503.2	3110001E05;CDC48;p97	scl0269523.2_3
Mapkap1	421.5	555.4	1	1	20.7863	scl00227743.1_265-S	NM_177345.2	D230039K05Rik	scl00227743.1_265
Flot1	670.3	879	1	1	20.7863	scl50763.13.1_199-S	NM_008027.1		scl50763.13.1_199
Mrpl35	41.6	65	0.9944	0.9981	20.7887	scl0066223.2_60-S	NM_025430.1	1110066C01Rik	scl0066223.2_60
4732433M03	15	87.2	0.9607	0.9994	20.8146	GI_38049602-S	XM_129769.4		GI_38049602
Cops2	879.6	1327.3	1	1	20.8588	scl0012848.2_316-S	NM_009939.1	alien-like;Csn2;Sgn2;Trip15	scl0012848.2_316
Brms1	1063	1418.4	1	1	20.8751	scl0107392.1_305-S	NM_134155.1	AW554636	scl0107392.1_305
Mir16	47.2	90.8	0.9956	0.9994	20.9025	scl000144.1_17-S	NM_019580.3	1200003M13Rik;GDE1;RGS16	scl000144.1_17
Arl6ip2	184.8	266.1	1	1	20.9089	scl0056298.2_141-S	NM_019717.1	Aip-2;AV334690	scl0056298.2_141
Adk	183.4	294	1	1	20.9692	scl000377.1_101-S	NM_134079.1	5033405D03Rik;AK;MGC6593	scl000377.1_101
Gp9	62.6	173	0.9963	1	20.9705	scl29782.3.1_1-S	NM_018762.1	Cd42;GPIX	scl29782.3.1_1
Copb2	1605.6	2224.7	1	1	21.0024	scl36580.22.1_188-S	NM_015827.1		scl36580.22.1_188
	268.7	373.3	1	1	21.0239	scl000490.1_983-S	AK076578.1		scl000490.1_983
AI642036	129.7	181.9	0.9994	1	21.0296	scl0001376.1_1-S	XM_109767.2		scl0001376.1_1
Etfb	1334.7	1758.9	1	1	21.0388	scl32752.7.1_23-S	NM_026695.2	0610009I16Rik;2810441H06Rik	scl32752.7.1_23
	35.8	67.8	0.9913	0.9981	21.0852	scl000438.1_148-S	AK034942.1		scl000438.1_148
Gp5	119.1	367.6	0.9994	1	21.0984	scl48582.2_713-S	NM_008148.2	GPV	scl48582.2_713
Lypla2	3145.8	4112	1	1	21.1063	scl23666.9_53-S	NM_011942.1	LysoII	scl23666.9_53
2610524G07Rik	2664.1	3483.4	1	1	21.107	scl0066494.2_134-S	NM_025596.4		scl0066494.2_134
1110007A13Rik	1020.8	1339.2	1	1	21.1516	scl0210711.2_41-S	NM_145955.2	MGC36596	scl0210711.2_41
Mat2b	206.2	346.8	1	1	21.1592	scl0001524.1_45-S	NM_134017.1	2410018D16Rik;MAT-II;MATIIbeta;TGR	scl0001524.1_45
Mrpl1	260.8	454	1	1	21.1729	scl0094061.1_118-S	NM_053158.1	2410002L03Rik;5830418D04Rik	scl0094061.1_118
Trim33	63.5	92.8	0.9963	0.9994	21.198	scl094093.7_13-S	NM_053170.1	mKIAA1113	scl094093.7_13
2610318I01Rik	82	124.5	0.9988	1	21.2194	scl21577.11_122-S	NM_153118.1	MGC30506	scl21577.11_122
Cdkn1a	137.6	187.9	0.9994	1	21.2346	scl012575.1_2-S	NM_007669.2	CAP20;CDKI;Cdkn1;CIP1;mda6;P21;p21Cip1;p21WAF;SDI1;Waf1	scl012575.1_2
Psmd13	649.7	958.1	1	1	21.253	scl00071.1_7-S	NM_011875	S11	scl00071.1_7
Nrm	1475.1	1934.1	1	1	21.2712	scl50767.4_663-S	NM_134122.1		scl50767.4_663
Azi2	227.4	341.8	1	1	21.2861	scl0003596.1_1065-S	NM_013727.2	AZ2	scl0003596.1_1065
Ddx28	80.5	118	0.9988	0.9994	21.2924	scl34380.1_1-S	NM_028038.1	2410004K13Rik;Mddx28	scl34380.1_1
6330562C20Rik	15.5	91.2	0.9613	0.9994	21.3181	scl076193.1_200-S	XM_358602.1		scl076193.1_200
Pde6d	386.2	511.8	1	1	21.3201	scl000766.1_20-S	NM_008801.2		scl000766.1_20
Ddx47	171.3	245.8	1	1	21.3326	scl0001184.1_52-S	NM_026360.1	4930588A18Rik	scl0001184.1_52
Ap1s1	88.7	158.4	0.9994	1	21.3692	scl0003948.1_98-S	NM_007457	AP19	scl0003948.1_98
LOC382020	1856.9	2791.6	1	1	21.3753	GI_38089330-S	XM_356090.1		GI_38089330
Rhobtb3	30.3	53.8	0.9894	0.9969	21.3785	scl0073296.1_60-S	NM_028493.1	1700040C17Rik;2610033K01Rik;4930503C18Rik;mKIAA0878	scl0073296.1_60
Ly64	6.5	23.6	0.8615	0.9881	21.3894	scl49206.9.1_48-S	NM_010739.1	14/A10;Lrrp;MUC13;NJ-1	scl49206.9.1_48
Rsn	524.8	693.2	1	1	21.3965	scl26054.30_361-S	NM_019765	1110007I12Rik;4631429H07Rik;CLIP-170;CLIP170;Clip50;CYLN1	scl26054.30_361
Gca	38.1	61.1	0.9931	0.9975	21.4183	scl0003196.1_98-S	NM_145523.2	5133401E04Rik	scl0003196.1_98
Atp1b3	1524.5	2004.8	1	1	21.4401	scl35489.7_147-S	NM_007502.1		scl35489.7_147
Gpiap1	204.5	277.8	1	1	21.4426	scl0053872.2_123-S	NM_016739.2	Gpiap;MMGPIP137;P137	scl0053872.2_123
Akr1c12	166.6	225.9	1	1	21.4548	scl44313.2.1_9-S	NM_013777.1		scl44313.2.1_9
Uros	80.2	118.6	0.9988	0.9994	21.4851	ri|0710001M08|R000005G01|AK002971|238-S	AK002971	Uros3	ri|0710001M08|R000005G01|AK002971|238
F5	19.7	51.1	0.9775	0.9963	21.4885	ri|C730026K03|PX00086P20|AK050205|846-S	AK050205	Cf-5;Cf5	ri|C730026K03|PX00086P20|AK050205|846
BC057552	418.8	605.9	1	1	21.5289	scl34569.13_162-S	NM_172502.1	6720484B16;MGC66593	scl34569.13_162
Bccip	798.7	1305	1	1	21.5382	scl31959.7.1_44-S	NM_025392.1	1110013J05Rik;TOK-1	scl31959.7.1_44
2810407C02Rik	89.8	139.1	0.9994	1	21.5713	ri|2810407C02|ZX00034B10|AK013022|1179-S	AK013022		ri|2810407C02|ZX00034B10|AK013022|1179
LOC223594	498.3	759.9	1	1	21.5917	GI_38077541-S	XM_128085.2		GI_38077541
C78212	290.2	496.1	1	1	21.5955	scl0380601.1_239-S	NM_198176.1	MGC60835	scl0380601.1_239
2610030H06Rik	135.1	185.3	0.9994	1	21.5956	scl067048.4_1-S	XM_110750		scl067048.4_1
Slco4a1	39.9	76.2	0.9944	0.9994	21.6513	scl19788.13_0-S	NM_148933.1	MGC28799;MGC28824;OATP-E;Slc21a12	scl19788.13_0
Asb2	1462.2	1950.5	1	1	21.6803	scl42115.9.1_121-S	NM_023049.1	1110008E15Rik	scl42115.9.1_121
Rbm3	1909.1	2509.2	1	1	21.6826	scl0002954.1_36-S	NM_016809	2600016C11Rik	scl0002954.1_36
Eif3s4	62.1	97.8	0.9963	0.9994	21.7387	scl053356.4_13-S	NM_016876.2	44kDa;eIF3-p44;p44	scl053356.4_13
A630042L21Rik	300.3	413.2	1	1	21.7539	scl51365.21_674-S	NM_134134.1	2510002C16Rik;AI413166;mKIAA0194	scl51365.21_674
Mrps11	394.6	657.3	1	1	21.7715	scl00036.1_15-S	NM_026498.1	0710005I03Rik	scl00036.1_15
Anxa2	2558.8	3486.1	1	1	21.7864	scl36760.13.1_118-S	NM_007585.2	Cal1h	scl36760.13.1_118
Tarbp2	62.6	92.2	0.9963	0.9994	21.837	scl021357.9_262-S	NM_009319	Prbp	scl021357.9_262
Gars	1832.1	2859	1	1	21.8377	scl30011.18.1_29-S	NM_180678.2		scl30011.18.1_29
Nin	206	278	1	1	21.8389	scl0002340.1_98-S	NM_008697	mKIAA1565	scl0002340.1_98
Pold1	765.2	1143.2	1	1	21.8402	scl31412.26.1_74-S	NM_011131.2	125kDa	scl31412.26.1_74
Exosc1	470.3	657.9	1	1	21.916	scl066583.1_67-S	NM_025644.3	2610035C18;2610104C07Rik	scl066583.1_67
Bop1	100.4	142.8	0.9994	1	21.927	scl47043.17.1_62-S	NM_013481.1	Kiaa0124;mKIAA0124	scl47043.17.1_62
9830109N13Rik	30.8	59.5	0.9906	0.9969	21.9385	scl0003991.1_0-S	NM_145414.1	AI326939;Wbscr20	scl0003991.1_0
Il1b	407.6	1317.7	1	1	21.9445	scl18674.7.1_35-S	NM_008361	Il-1b;IL-1beta	scl18674.7.1_35
Impdh2	2711.4	3788	1	1	21.9762	scl023918.12_65-S	NM_011830	IMPD	scl023918.12_65
Ptbp1	1984.3	2695.4	1	1	21.9774	scl38706.14_33-S	NM_008956	HNRPI;pPTB;Ptb;PTB-1;PTB2;PTB3;PTB4	scl38706.14_33
0610007P06Rik	456.4	621.4	1	1	21.9959	GI_13399317-S	NM_026304.1	1110002N09Rik;l7Rn6	GI_13399317
Snx10	191.5	281.4	1	1	22.0387	scl30048.11_144-S	NM_028035.2	2410004M09Rik	scl30048.11_144
Thap11	634.7	860.1	1	1	22.0683	scl33402.1_220-S	NM_021513.1	CTG-B43a;CTG-B45d	scl33402.1_220
Taf1c	554.1	735.3	1	1	22.0707	scl021341.1_249-S	NM_021441.1	mTAFI95;Tafi95	scl021341.1_249
Scye1	570.2	756.6	1	1	22.0815	scl013722.3_29-S	NM_007926.1	Emap2;EMAPII	scl013722.3_29
Etfdh	75.4	110.4	0.9975	0.9994	22.0849	scl22042.11.1_29-S	NM_025794.1	0610010I20Rik	scl22042.11.1_29
Mrps31	98.8	138.9	0.9994	1	22.0894	scl000657.1_20-S	NM_020560.1	1500002D03Rik;Imogen38;Imogen44	scl000657.1_20
Surf4	181.8	246.9	1	1	22.0932	scl19517.6_242-S	NM_011512.2	Surf-4	scl19517.6_242
Mrps18b	161.1	253.6	1	1	22.1572	scl0066973.1_60-S	NM_025878.1	2400002C15Rik	scl0066973.1_60
Acadvl	474.2	641	1	1	22.1614	scl40004.19.1_140-S	NM_017366	VLCAD	scl40004.19.1_140
Arl1	257	348.6	1	1	22.1636	scl0104303.6_291-S	NM_025859.1	2310008D22Rik	scl0104303.6_291
Pold2	588.3	950.4	1	1	22.1778	scl40552.11.1_156-S	NM_008894.1	50kDa;p50;po1D2	scl40552.11.1_156
Treml1	565.2	1522.8	1	1	22.1918	scl50634.6.1_239-S	XM_128641.3		scl50634.6.1_239
Snrpb	399.7	574.4	1	1	22.2201	scl0020638.1_79-S	NM_009225.1	SM-B;SM11;SMB;SNRNP-B	scl0020638.1_79
Mrps5	186	286	1	1	22.2231	scl0003356.1_0-S	NM_029963.2	1620401I16Rik	scl0003356.1_0
Nr1i3	137.7	189.7	0.9994	1	22.2308	ri|2700019J03|ZX00063A19|AK012264|1617-S	AK012264	CAR;CAR1;CAR2;Care2;ESTM32;MB67;mCAR	ri|2700019J03|ZX00063A19|AK012264|1617
Fbxo31	133.4	184.1	0.9994	1	22.2379	scl34239.10.1_18-S	NM_133765.2		scl34239.10.1_18
2700060E02Rik	1651.4	2181	1	1	22.2492	scl068045.1_243-S	NM_026528.1		scl068045.1_243
Rela	870.5	1153	1	1	22.264	scl52850.12_273-S	NM_009045.2	p65	scl52850.12_273
Zbtb17	479.7	638.6	1	1	22.2652	scl022642.16_28-S	NM_009541.1		scl022642.16_28
Abcf2	263.3	396.9	1	1	22.2829	scl0027407.2_100-S	NM_013853.1	0710005O05Rik;D13Ertd614e;E430001O06	scl0027407.2_100
Alas1	647.7	860	1	1	22.3108	scl35398.12.2_77-S	NM_020559.1	ALAS;Alas-1;Alas-h	scl35398.12.2_77
Snrpa	326.8	496.8	1	1	22.3272	scl053607.7_2-S	NM_015782.2	Rnu1a-1;Rnu1a1;U1A	scl053607.7_2
Mrpl12	487.3	792.6	1	1	22.33	scl056282.5_222-S	NM_027204.2	0610034O11Rik;1500031N16Rik;MRP-L12;Rpml12	scl056282.5_222
Klhdc4	413.7	552.1	1	1	22.3324	scl00234825.2_277-S	NM_145605.1		scl00234825.2_277
Rasa3	592.8	787.9	1	1	22.3429	scl0019414.2_254-S	NM_009025.1	E130011G04;GAPIII	scl0019414.2_254
Uqcrh	4652	6137.3	1	1	22.3591	scl066576.4_1-S	NM_025641.2		scl066576.4_1
2610528E23Rik	1.6	28.3	0.6687	0.99	22.3626	scl48370.15.1_106-S	XM_148465.1	1110001A06Rik;4930572F24Rik;AV122629	scl48370.15.1_106
Clns1a	1057.5	1400.3	1	1	22.3627	scl0012729.2_6-S	NM_023671.1	2610036D06Rik;2610100O04Rik;Clci;Clcni;ICLN	scl0012729.2_6
Smu1	181.9	247.6	1	1	22.3682	scl24435.7.6_19-S	NM_021535.2		scl24435.7.6_19
D5Ertd689e	190.3	274.1	1	1	22.4115	scl052397.1_25-S	XM_358356.1		scl052397.1_25
Pscd4	3309.6	4370	1	1	22.4162	scl47766.12_451-S	NM_028195	2510004M07Rik;5830469K17Rik	scl47766.12_451
Ckap1	950.1	1259.4	1	1	22.4265	scl31534.6.1_6-S	NM_025548.1	2410007D12Rik;CG22;CKAPI;TBCB	scl31534.6.1_6
AA959742	172.2	239.3	1	1	22.4271	scl41025.7_232-S	NM_133807.1		scl41025.7_232
Iap	3485.6	4656.6	1	1	22.4684	scl0015598.1_13-S	NM_010490		scl0015598.1_13
Mrps34	1200.1	1590.7	1	1	22.4769	scl50998.1_28-S	NM_023260.1	0610007F04Rik;5330430D13Rik;Tce2	scl50998.1_28
Rutbc3	186.6	313.5	1	1	22.5155	scl0105835.22_280-S	NM_134091.1	1810012I01Rik;AI428557;RUSC3	scl0105835.22_280
2310047L21Rik	94.9	134.5	0.9994	1	22.5179	ri|2310047L21|ZX00040G20|AK009885|2025-S	AK009885		ri|2310047L21|ZX00040G20|AK009885|2025
C1galt1	31.7	54	0.9906	0.9969	22.5233	scl0094192.2_160-S	NM_052993.2		scl0094192.2_160
Pgk1	432.2	577.3	1	1	22.5282	scl018655.12_25-S	NM_008828	Pgk-1	scl018655.12_25
Thoc4	495.2	723.1	1	1	22.5419	scl021681.3_9-S	NM_011568.1		scl021681.3_9
Mrps30	952.2	1370.2	1	1	22.5433	scl43457.5.1_29-S	NM_021556.2	2610020A16Rik;PAP;Pdcd9	scl43457.5.1_29
Tlr8	11.7	29.7	0.9357	0.9906	22.5482	scl0170744.1_200-S	NM_133212.1		scl0170744.1_200
Pparg	109.5	251.9	0.9994	1	22.5499	scl29611.11.1_50-S	NM_011146.1	Nr1c3;PPAR-gamma;PPAR-gamma2	scl29611.11.1_50
D5Ertd33e	113.1	173.7	0.9994	1	22.5849	scl27366.3_38-S	NM_026504.1	1810014G04Rik	scl27366.3_38
0610009I22Rik	62.2	95.2	0.9963	0.9994	22.5852	scl20251.8_441-S	NM_025646	4930557M15Rik;5730490M08Rik	scl20251.8_441
Col4a2	1653	2301.1	1	1	22.6744	scl34083.48_466-S	NM_009932.2	Col4a-2;MGC7371	scl34083.48_466
Ak2	156.8	229.6	1	1	22.6976	scl0002777.1_339-S	NM_016895.2	Ak-2;D4Ertd220e	scl0002777.1_339
Atad1	80.5	116.1	0.9988	0.9994	22.7307	scl52549.14_1-S	NM_026487.2	4921525H23Rik	scl52549.14_1
Kng1	218.6	1151.9	1	1	22.7395	scl016644.11_30-S	NM_023125.2		scl016644.11_30
2015-09-01	813.6	1198.3	1	1	22.7642	scl22501.2_29-S	NM_053102	15kDa;9430015P09Rik	scl22501.2_29
1810047C23Rik	196.2	267.5	1	1	22.8562	scl000603.1_82-S	NM_138668.1	MGC7482	scl000603.1_82
Hmgcs1	802	1067.9	1	1	22.8875	scl0208715.1_140-S	NM_145942.2	B130032C06Rik;MGC36662	scl0208715.1_140
9630050A07Rik	34.5	57.7	0.9906	0.9969	22.9128	ri|9630050A07|PX00117O14|AK036261|1344-S	AK036261		ri|9630050A07|PX00117O14|AK036261|1344
Mapre1	2185.1	3130	1	1	22.9228	scl0013589.1_127-S	NM_007896.2	5530600P05Rik;BIM1p;Eb1	scl0013589.1_127
AA589584	1873.7	2510.1	1	1	22.932	GI_38089372-S	XM_146606.3		GI_38089372
1810020G14Rik	534.1	714.2	1	1	22.9706	scl066272.3_26-S	NM_025461.2	1810055I05Rik	scl066272.3_26
Gtf2h3	193.2	268.3	1	1	22.9754	scl00209357.2_233-S	NM_181410.2		scl00209357.2_233
Mrpl49	59.7	92.9	0.9963	0.9994	22.9773	scl53524.2.2_2-S	NM_026246.1	4833419D18Rik;Nof1	scl53524.2.2_2
Cd69	279.7	422.6	1	1	22.9977	scl012515.2_183-S	XM_132882.1		scl012515.2_183
Park7	3148.3	4280.2	1	1	23.0109	scl23478.14.23_30-S	NM_020569.1	DJ-1;Dj1	scl23478.14.23_30
Erdr1	670.1	2514.3	1	1	23.0368	scl0170942.1_210-S	NM_133362	edr;MGC5764	scl0170942.1_210
2700055K07Rik	26.1	47.4	0.9888	0.9956	23.04	scl34402.5.1_27-S	NM_026481.2		scl34402.5.1_27
Mrps9	637.7	851.8	1	1	23.0713	scl18015.10.1_64-S	NM_023514.2	2310002A08Rik;mg637	scl18015.10.1_64
1700048E23Rik	386	518.9	1	1	23.1491	scl073373.8_41-S	NM_028521.1		scl073373.8_41
Nudc	124.8	187.4	0.9994	1	23.1804	scl018221.7_88-S	NM_010948.1	NudC;SIG-92;Silg92	scl018221.7_88
Eif5a	1959.6	2984.2	1	1	23.1904	scl40009.3.137_12-S		D19Wsu54e;MGC6725	scl40009.3.137_12
1700041B20Rik	495.5	670.4	1	1	23.2093	scl0073338.1_268-S	XM_485065		scl0073338.1_268
C330023M02Rik	174.8	264.1	1	1	23.2217	scl27279.25_477-S	NM_172722	4833422K13Rik;A630046C11	scl27279.25_477
1600019D15Rik	488.4	812.7	1	1	23.224	scl0004156.1_115-S	NM_028975.2	2410089A21Rik;2700052H22Rik;5430406L04Rik;db83	scl0004156.1_115
Vwf	419.9	863.9	1	1	23.2296	scl29492.60.1_120-S	NM_011708.2	6820430P06;6820430P06Rik;B130011O06Rik;C630030D09;F8VWF;VWD	scl29492.60.1_120
Pdcd11	107.5	151.8	0.9994	1	23.2319	scl53059.36.1_16-S	NM_011053		scl53059.36.1_16
4933433H22Rik	7.6	26.5	0.8877	0.99	23.2476	scl50438.8_8-S			scl50438.8_8
3100002B05Rik	409.1	602.4	1	1	23.2518	scl0068299.1_136-S	NM_026664.2	2010002A08Rik;2310040I21Rik	scl0068299.1_136
1200003O06Rik	993.7	1325.5	1	1	23.2782	scl23109.16_229-S	NM_025813.1		scl23109.16_229
Hspbap1	82.7	120.8	0.9988	0.9994	23.2847	scl0066667.2_152-S	NM_175111.2	3830421G21Rik	scl0066667.2_152
Lamp2	64.1	95.6	0.9963	0.9994	23.337	scl0002992.1_44-S	NM_010685.2	CD107b;Lamp-2	scl0002992.1_44
Itih3	63.5	161.1	0.9963	1	23.4189	scl45772.22.1_79-S	NM_008407	Intin3;Itih-3	scl45772.22.1_79
Abcf2	176.4	285.6	1	1	23.423	scl027407.6_4-S	NM_013853.1	0710005O05Rik;D13Ertd614e;E430001O06	scl027407.6_4
Mrps33	358.4	483.5	1	1	23.4252	scl014548.2_14-S	NM_010270.1	CGI-139;Gdap3;MRP-S33;PTD003	scl014548.2_14
2810430M08Rik	256.4	372.3	1	1	23.4271	scl067223.1_25-S	NM_026041.1		scl067223.1_25
Atp5g3	5683	7668.7	1	1	23.4664	scl19131.5.1_9-S	NM_175015.1	6030447M23	scl19131.5.1_9
9030407H20Rik	34.3	116.9	0.9906	0.9994	23.4682	scl28522.14.1_1-S	NM_144805.1	W64236	scl28522.14.1_1
Ppp1ca	2399.8	3616.3	1	1	23.5609	scl000534.1_21-S	NM_031868.1	dism2;Ppp1c	scl000534.1_21
Basp1	2387.2	3273.7	1	1	23.586	scl47358.1_193-S	NM_027395	2610024P12Rik;CAP-23;CAP23;NAP-22;NAP22	scl47358.1_193
Dscr1l2	262.7	357.1	1	1	23.5985	scl0053902.1_216-S	NM_022980.2		scl0053902.1_216
Pdcd5	331.6	453.3	1	1	23.6055	scl0056330.1_0-S	NM_019746.2	2200003D22Rik;Tfar19	scl0056330.1_0
Morf4l2	1717.3	2394.7	1	1	23.629	scl056397.1_158-S	NM_019768.2	2410017O14Rik;mKIAA0026;MRGX;Sid393p	scl056397.1_158
Tkt	4815.9	7051.4	1	1	23.7105	scl021881.14_30-S	NM_009388.2	p68	scl021881.14_30
Ebna1bp2	422.1	595.6	1	1	23.7174	scl069072.8_1-S	NM_026932.2	1810014B19Rik;Ebp2;Nobp;p40	scl069072.8_1
Dscr2	190.6	313	1	1	23.7238	scl056088.2_28-S	NM_019537.1		scl056088.2_28
Gstz1	259.3	353.1	1	1	23.7536	scl42938.12_138-S	NM_010363.2	MAAI	scl42938.12_138
2510038A11Rik	94.5	138	0.9994	1	23.7598	scl46945.2.7_65-S	NM_175109.2		scl46945.2.7_65
Itgb1	2088.2	2855	1	1	23.7799	scl33150.17.997_2-S	NM_010578.1	CD29;Fnrb;gpIIa	scl33150.17.997_2
2600001B17Rik	261.2	397	1	1	23.8157	scl0268490.8_24-S	NM_172947.1		scl0268490.8_24
Dld	647.8	986.4	1	1	23.8377	scl0002332.1_7-S	NM_007861		scl0002332.1_7
Tpm4	1735.4	2319.4	1	1	23.8397	scl0326618.9_77-S	XM_134274.3		scl0326618.9_77
Nxt2	218.1	298.7	1	1	23.8496	scl0237082.4_163-S	NM_172782.1		scl0237082.4_163
Aldh3a1	52	242.1	0.9963	1	23.8892	scl41468.13.1_27-S	NM_007436.1	Ahd-4;Ahd4;Aldh;Aldh3	scl41468.13.1_27
Tubg1	351.1	596.5	1	1	23.9342	scl40893.11.1_49-S	NM_134024.1	MGC8041;Tubg	scl40893.11.1_49
Chchd4	381.2	522.4	1	1	23.9433	scl28683.3_131-S	NM_133928.1	2410012P20Rik;2810014D17Rik;AI838740	scl28683.3_131
Gtf3a	175.9	254.1	1	1	23.9546	scl0066596.2_43-S	NM_025652.1	2010015D03Rik;2610111I01Rik;5330403M05Rik	scl0066596.2_43
2010012F05Rik	487.6	693.9	1	1	23.9702	scl075608.7_106-S	NM_029362		scl075608.7_106
Dnm1l	54.3	89.7	0.9963	0.9994	23.9747	scl0074006.2_261-S	NM_152816.1	6330417M19Rik;Drp1	scl0074006.2_261
Ubqln1	1231.2	1649.6	1	1	24.0099	scl0003758.1_1237-S	NM_026842.3	1110046H03Rik;1810030E05Rik;D13Ertd372e;DA41;Dsk2;Plic-1;XDRP1	scl0003758.1_1237
6430548M08Rik	74.5	109.7	0.9975	0.9994	24.0547	scl00234797.2_307-S	NM_172286.2	mKIAA0513	scl00234797.2_307
D15Mgi27	550.6	742.2	1	1	24.065	scl47467.2_297-S	NM_134100.2		scl47467.2_297
BC025519	364.5	537.1	1	1	24.0937	scl46892.6_503-S	XM_110101.3		scl46892.6_503
Myo1f	477.3	644.6	1	1	24.1158	scl50849.26.1_265-S	NM_053214.1	C330006B10Rik	scl50849.26.1_265
BC006705	603.8	814.4	1	1	24.1332	scl00214572.1_279-S	NM_145404.1	4933402B05Rik;MGC7929	scl00214572.1_279
Endogl1	141.7	198.1	0.9994	1	24.1638	scl36347.8_506-S	NM_172456.1	4732466J24;ENDOGL2;ENGL;ENGL-a;ENGL-B	scl36347.8_506
BC028440	336.7	457.5	1	1	24.203	scl32922.5.1_20-S	NM_172148.1	MGC41256	scl32922.5.1_20
Sec61b	261.1	368.2	1	1	24.2137	scl0066212.1_0-S	NM_024171.1	1190006C12Rik	scl0066212.1_0
Bzw1	130.7	184.9	0.9994	1	24.2373	scl0066882.1_105-S	NM_025824.2	1200015E15Rik;MGC6434;mKIAA0005	scl0066882.1_105
BC003277	883.4	1187.6	1	1	24.2394	scl0214359.1_299-S	NM_145402.2	FLJ10199	scl0214359.1_299
Rpo1-4	532.6	719.1	1	1	24.2397	scl0020019.1_252-S	NM_009088.2	194kDa;3010014K16Rik;mRPA1;RPA194	scl0020019.1_252
Nipa	531.3	720.4	1	1	24.2442	scl29201.11.474_200-S	NM_172735.1	1110054L24Rik	scl29201.11.474_200
Mrps33	1112.9	1494.8	1	1	24.2801	GI_58331152-A	NM_001010930.1	AI841153;CGI-139;Gdap3;MGC106490;MRP-S33;PTD003	GI_58331152
Catnal1	78.9	115.7	0.9981	0.9994	24.2988	scl24307.19_191-S	NM_018761.2	ACRP;CTNNAL1	scl24307.19_191
2410166I05Rik	1540.9	2067.7	1	1	24.3246	scl0076824.1_187-S	NM_029759.2		scl0076824.1_187
Exosc4	260	355.6	1	1	24.3434	scl47801.3_265-S	NM_175399.2	1110039I09Rik;1500001N04Rik;Rrp41	scl47801.3_265
Ddx47	1935.1	2613	1	1	24.3606	scl067755.12_300-S	NM_026360.1	4930588A18Rik	scl067755.12_300
Selp	32.9	91.7	0.9906	0.9994	24.4503	scl17286.15.1_2-S	NM_011347.1	CD62P;Grmp;P-selectin;PADGEM	scl17286.15.1_2
Acac	313.9	513.4	1	1	24.4522	scl00107476.1_222-S	XM_109883.4		scl00107476.1_222
Ebi3	159.3	228.9	1	1	24.4576	scl50608.5.1_156-S	NM_015766.1	IL-27	scl50608.5.1_156
Pomt2	64.5	97.2	0.9969	0.9994	24.4754	scl00217734.2_317-S	NM_153415.1	A830009D15Rik	scl00217734.2_317
Fos	10.4	29.2	0.9283	0.99	24.4962	scl42959.4_58-S	NM_010234.2	c-fos;D12Rfj1	scl42959.4_58
A530023O14Rik	-5.8	15.7	0.1316	0.9713	24.5599	scl0244183.1_172-S	NM_175648.2		scl0244183.1_172
Plekhj1	76.7	133.9	0.9975	1	24.6441	scl37720.1.644_7-S	NM_023900.1	9530063M10Rik	scl37720.1.644_7
2015-09-01	674.4	989.4	1	1	24.6531	scl0002080.1_55-S	NM_053102.1	15kDa;9430015P09Rik	scl0002080.1_55
E2f6	55.6	85.8	0.9963	0.9994	24.6544	scl0050496.2_2-S	NM_033270.1	EMA	scl0050496.2_2
Rgs1	82.8	153.2	0.9988	1	24.6921	scl000798.1_9-S	NM_015811.1	BL34	scl000798.1_9
Nap1l1	887	1219.2	1	1	24.6969	scl0003917.1_104-S	NM_015781.2	D10Ertd68e;NAP-1	scl0003917.1_104
Zyx	4237.4	5689.4	1	1	24.6989	scl022793.9_329-S	NM_011777.1	9530098H06Rik	scl022793.9_329
Mgmt	122.3	177.3	0.9994	1	24.7068	scl0017314.1_97-S	NM_008598.1		scl0017314.1_97
Psmb4	4254.2	6017.5	1	1	24.7614	scl21857.5.1_13-S	NM_008945.1		scl21857.5.1_13
Cd9	724.4	979.1	1	1	24.7723	scl28399.6.24_1-S	NM_007657.2		scl28399.6.24_1
2610029K21Rik	129.1	195.4	0.9994	1	24.781	scl23010.9_157-S	NM_025663.2		scl23010.9_157
BC004022	234.2	322.5	1	1	24.8368	scl34521.8.1_20-S	XM_134557.1	MGC7607;N4bp1	scl34521.8.1_20
2610510D13Rik	33	69.3	0.9906	0.9994	24.8415	scl0229279.5_20-S	NM_146130	2410013L13Rik;2610209F03Rik;hnRNPA3;MGC37309	scl0229279.5_20
Tm7sf2	37.9	63.3	0.9931	0.9975	24.8415	scl073166.5_2-S	XM_129087		scl073166.5_2
Stx11	481.9	901.6	1	1	24.8499	scl38195.4_424-S	XM_203312.2		scl38195.4_424
Hs3st2	213.4	335.5	1	1	24.8674	scl00195646.1_300-S	XM_112440		scl00195646.1_300
Eif3s6ip	1578.8	2168.1	1	1	24.8889	scl0002578.1_9-S	NM_145139.1	0610011H21Rik;HSP-66Y;MGC37328;PAF67	scl0002578.1_9
Tbl2	179.9	261.8	1	1	24.8993	scl0027368.2_99-S	NM_013763.2	WS-bTRP	scl0027368.2_99
Mfn2	913.4	1390	1	1	24.9159	scl23528.23_0-S	NM_133201.1	D630023P19Rik;Fzo	scl23528.23_0
Mapk9	98	148.1	0.9994	1	24.9364	scl0001471.1_1-S	NM_207692.1	JNK2;p54aSAPK;Prkm9	scl0001471.1_1
Ndufs4	923.4	1247.7	1	1	24.9437	scl0003628.1_0-S	NM_010887.1	C1-18k	scl0003628.1_0
Agtrap	75.8	120.2	0.9975	0.9994	24.9697	scl23525.7_662-S	NM_009642.3	AT1R;Atrap;D4Wsu124e	scl23525.7_662
D430022H17Rik	64	111.2	0.9963	0.9994	25.0027	ri|D430022H17|PX00194G21|AK084998|1077-S	AK084998		ri|D430022H17|PX00194G21|AK084998|1077
Cops6	839.4	1136.4	1	1	25.1331	scl026893.9_4-S	NM_012002.1	Sgn3;VIP/MOV34	scl026893.9_4
Fubp3	370.5	523.9	1	1	25.1581	scl0320267.1_220-S	XM_130112		scl0320267.1_220
Anxa5	1613.3	2182.4	1	1	25.1894	scl011747.1_83-S	NM_009673.1	Anx5	scl011747.1_83
D10Ertd438e	152.9	214.8	0.9994	1	25.2548	scl0052014.2_243-S	NM_030250.1	1600027K07Rik;MGC7199	scl0052014.2_243
Axin	692.2	939.5	1	1	25.2934	scl50961.11_474-S	XM_128515.4		scl50961.11_474
0610009H04Rik	303	416.1	1	1	25.316	scl0001329.1_110-S	NM_018854.3	IFT20	scl0001329.1_110
Stau2	45.8	79.2	0.995	0.9994	25.3263	scl0029819.2_92-S	NM_025303.1		scl0029819.2_92
Gpr39	19.7	40.9	0.9775	0.995	25.3543	scl17542.1.28_62-S	XM_136205		scl17542.1.28_62
Shmt2	44.9	85.2	0.995	0.9994	25.3813	scl0003775.1_106-S	NM_028230.2	2700043D08Rik	scl0003775.1_106
Gcs1	621.4	913	1	1	25.4181	scl29846.4_459-S	NM_020619.2	1810017N02Rik	scl29846.4_459
Slc25a5	3507.9	5111.3	1	1	25.4221	scl011740.4_112-S	NM_007451.2	Ant2	scl011740.4_112
Mphosph6	149.1	210	0.9994	1	25.4453	scl068533.1_32-S	NM_026758.1	1110001M01Rik	scl068533.1_32
6330407G04Rik	518.7	706.9	1	1	25.4627	scl45363.6_489-S	NM_134078.2	AI450338	scl45363.6_489
Atp5c1	2941.6	4405.5	1	1	25.5074	scl011949.3_3-S	NM_020615.2	1700094F02Rik	scl011949.3_3
Rab1	216.7	300.9	1	1	25.582	scl41808.6_29-S	NM_008996.2	Gtbp;mKIAA3012;Rab-1;Rab1A;Ypt1	scl41808.6_29
1810027I20Rik	9.1	51.8	0.9108	0.9969	25.6406	scl0004073.1_36-S	BC044883		scl0004073.1_36
Hrb	322.3	490.6	1	1	25.7543	scl17740.13_298-S	NM_010472.1	C130049H11Rik;D730048C23Rik;RAB;Rip	scl17740.13_298
Ak2	60.3	96.9	0.9963	0.9994	25.7686	scl011637.7_6-S	NM_016895.2	Ak-2;D4Ertd220e	scl011637.7_6
Lcmt1	367.1	585.5	1	1	25.7825	scl32083.13.1_101-S	NM_025304.3	Lcmt;MGC11807	scl32083.13.1_101
Commd4	1022	1394.3	1	1	25.7867	scl35797.7.1_123-S	NM_025417.1	1110039H05Rik	scl35797.7.1_123
Rsn	136	193.1	0.9994	1	25.8007	scl0056430.2_105-S	NM_019765.2	1110007I12Rik;4631429H07Rik;CLIP-170;CLIP170;Clip50;CYLN1	scl0056430.2_105
Rabl5	60.1	92.7	0.9963	0.9994	25.804	scl27111.3.1_10-S	NM_026073.2	3110017O03Rik	scl27111.3.1_10
Appbp2	418	572.8	1	1	25.8059	scl39796.13_278-S	NM_025825	1300003O07Rik;mKIAA0228;PAT1	scl39796.13_278
Dscr1l2	9.1	30.8	0.912	0.9906	25.8069	scl053902.1_215-S	NM_022980.2		scl053902.1_215
9330112E13Rik	449.7	616.7	1	1	25.8087	ri|9330112E13|PX00104D22|AK033896|2801-S	AK033896		ri|9330112E13|PX00104D22|AK033896|2801
Aprin	253.5	357.5	1	1	25.8361	scl00100710.2_193-S	NM_175310.3	AS3;mKIAA0979	scl00100710.2_193
Pnkp	914.6	1244	1	1	25.8467	scl32703.15.1_0-S	NM_021549.1	1810009G08Rik;PNK	scl32703.15.1_0
Pwp2h	538.5	735.8	1	1	25.8669	scl37772.15_266-S	NM_029546.1	6530411D08Rik;Pwp2;wdp103	scl37772.15_266
Etfa	203.9	298.8	1	1	25.8823	scl0003604.1_30-S	NM_145615.2	2010200I21Rik;D9Ertd394e	scl0003604.1_30
Hnrpk	425.7	757	1	1	25.9012	scl015387.16_11-S	NM_025279.1	NOVA	scl015387.16_11
0610012D09Rik	83.2	128.4	0.9988	1	25.9016	scl32110.5.1_11-S	NM_021554.2	Drev;MNCb-5680	scl32110.5.1_11
Serpinb2	9.7	31.9	0.9164	0.9919	26.0189	scl17576.8.1_5-S	NM_011111.2	ovalbumin;PAI-2;Planh2	scl17576.8.1_5
Ly6g6c	18.3	40.9	0.9744	0.9956	26.053	scl50796.3_29-S	NM_023463.2	1110003M04Rik;G6c;NG24	scl50796.3_29
B130016L12Rik	636.5	869.4	1	1	26.062	scl00217995.1_300-S	NM_144835.3		scl00217995.1_300
BC034834	4.3	32.3	0.7941	0.9919	26.0991	scl0226143.1_168-S	XM_129338.2		scl0226143.1_168
1110014C03Rik	1226.3	1668.8	1	1	26.131	scl42223.4_61-S	NM_026775	Tmp21	scl42223.4_61
Cdk2	80.9	128.6	0.9988	1	26.1346	scl0003852.1_15-S	NM_016756.1	A630093N05Rik	scl0003852.1_15
4931433E08Rik	372.6	512.7	1	1	26.1399	scl52893.6_98-S	XM_484765		scl52893.6_98
Tsta3	861.9	1175.7	1	1	26.2035	scl47056.10.1_17-S	NM_031201.1	FX;Tstap35b	scl47056.10.1_17
3930401E15Rik	279.4	399.6	1	1	26.2138	GI_38083572-S	XM_128959.3		GI_38083572
Nsdhl	37.2	67.4	0.9931	0.9981	26.2433	scl0018194.1_157-S	NM_010941.3	Bpa;H105E3;Str;XAP104	scl0018194.1_157
Bcl2a1b	1744.2	2470.4	1	1	26.2648	scl0012045.1_114-S	NM_007534	A1-b	scl0012045.1_114
Nubp2	296.5	432.5	1	1	26.2885	scl50196.7.1_2-S	NM_011956.2	D17Wsu11e	scl50196.7.1_2
Arpc5	384.4	606.2	1	1	26.3068	scl0067771.1_30-S	NM_026369.1	165kDa;5830443F10Rik;p16-Arc	scl0067771.1_30
1700065O13Rik	45.4	74	0.995	0.9994	26.371	ri|1700065O13|ZX00075N08|AK006897|633-S	AK006897		ri|1700065O13|ZX00075N08|AK006897|633
5430428G01Rik	204.3	286	1	1	26.4003	scl0066789.2_51-S	NM_024178.1		scl0066789.2_51
Cct3	571.4	884.6	1	1	26.4382	scl012462.9_0-S	NM_009836.1	Cctg;Tcp1-rs3;TriC-P5	scl012462.9_0
Samsn1	615.7	1005.4	1	1	26.4388	scl0067742.1_215-S	NM_023380.1	4930571B16Rik;930571B16Rik	scl0067742.1_215
Cxcl7	894.5	2517.8	1	1	26.4452	scl27603.2.1_3-S	NM_023785.1	2400003M24Rik;b-TG1;beta-TG;CTAP3;CTAPIII;LA-PF4;LDGF;MDGF;NAP-2;NAP-2-L1;Ppbp;Scyb7;TGB;TGB1;THBGB1	scl27603.2.1_3
Psat1	120.8	205.6	0.9994	1	26.4908	scl52691.13_82-S	XM_129211.2		scl52691.13_82
Zrf2	311.3	431.1	1	1	26.5021	scl0022792.2_35-S	NM_009584	MIDA1	scl0022792.2_35
Arl3	142.8	282.2	0.9994	1	26.5192	scl52400.3.8_10-S	NM_019718.2		scl52400.3.8_10
	8525.4	18129.2	1	1	26.607	IGKV3-9_Y15972_Ig_kappa_variable_3-9_10-S			IGKV3-9_Y15972_Ig_kappa_variable_3-9_10
Pgd	1592.5	2172.3	1	1	26.6097	scl0110208.1_282-S	NM_025801.1	0610042A05Rik	scl0110208.1_282
1110014D18Rik	220	307.8	1	1	26.6325	scl068501.1_4-S	NM_026746.1		scl068501.1_4
Dnaja3	824.9	1132.7	1	1	26.6453	scl083945.11_198-S	NM_023646.2	1200003J13Rik;1810053A11Rik;Tid-1;Tid1l	scl083945.11_198
Coq6	39.8	74	0.9944	0.9994	26.6927	scl0002298.1_37-S	NM_172582.1	5930427M12Rik	scl0002298.1_37
Fdps	657	1148.3	1	1	26.7499	scl0110196.3_64-S	NM_134469.2	6030492I17Rik;Fdpsl1;mKIAA1293	scl0110196.3_64
LOC333842	13186.7	17956.6	1	1	26.782	GI_38092211-S	XM_289937.2		GI_38092211
Rbpms2	27.2	60.6	0.9888	0.9975	26.8124	scl36802.10.1_30-S	NM_028030.2		scl36802.10.1_30
Bdh	96.4	159.5	0.9994	1	26.8199	scl49257.8_342-S	NM_175177	2310032J20Rik	scl49257.8_342
	54.8	92.2	0.9963	0.9994	26.8231	scl0001487.1_50-S	AK075947.1		scl0001487.1_50
2310004N11Rik	1113.8	1524.1	1	1	26.849	scl074178.11_191-S	NM_028800		scl074178.11_191
Dusp2	452.8	742.2	1	1	26.8715	scl20326.4.1_48-S	NM_010090.2	PAC1	scl20326.4.1_48
Acat2	38.8	79.1	0.9938	0.9994	26.9866	scl0001658.1_57-S	NM_009338	Tcp-1x;Tcp1-rs1	scl0001658.1_57
LOC280487	23.7	52	0.9844	0.9963	26.9944	GI_38083769-I	XM_203701.3		GI_38083769
G22p1	61.3	117.9	0.9963	0.9994	27.1053	scl0002561.1_38-S	NM_010247.1	70kDa;Ku70;Xrcc6	scl0002561.1_38
4933439J20Rik	47.7	79.9	0.9963	0.9994	27.1604	ri|4933439J20|PX00021H18|AK030267|2454-S	AK030267		ri|4933439J20|PX00021H18|AK030267|2454
2810025O06Rik	466.3	644.6	1	1	27.2334	ri|2810025O06|ZX00064P14|AK012814|640-S	AK012814		ri|2810025O06|ZX00064P14|AK012814|640
Hbb-b1	14495.6	19805.3	1	1	27.268	ri|2510040I07|ZX00060E20|AK011067|627-S	AK011067		ri|2510040I07|ZX00060E20|AK011067|627
1100001A21Rik	110.5	161.1	0.9994	1	27.2977	scl36523.6.1_28-S	NM_025651.2		scl36523.6.1_28
Orm2	-2	16.1	0.4367	0.9738	27.3511	scl25363.4.1_1-S	NM_011016.1	Orm-2	scl25363.4.1_1
Ube2g1	227.5	319.6	1	1	27.3674	scl0067128.1_219-S	NM_025985.2	2700059C12Rik;AI256795;AU014992;D130023C12Rik	scl0067128.1_219
Abi3	1587.9	2178.1	1	1	27.3965	scl0066610.1_317-S	NM_025659.1	2210414K06Rik;NESH	scl0066610.1_317
C330023F11Rik	81.4	125.7	0.9988	1	27.4024	scl17151.10_21-S	NM_178653.2		scl17151.10_21
AU023871	153.7	333.2	0.9994	1	27.4035	GI_85701725-S	NM_001033221.1		GI_85701725
Sqle	30.6	67.6	0.9906	0.9981	27.5027	scl0002494.1_23-S	NM_009270.2		scl0002494.1_23
Rps2	9335	13428.2	1	1	27.5085	scl016898.7_20-S	NM_008503.2	Llrep3	scl016898.7_20
Psmd5	112.5	189.1	0.9994	1	27.5132	scl0003145.1_1-S	NM_080554.1	1500032A03Rik;S5b	scl0003145.1_1
Eif3s4	2699.6	3717.6	1	1	27.5349	scl0027558.1_128-S	NM_016876.2	44kDa;eIF3-p44;p44	scl0027558.1_128
LOC380631	556.1	768.8	1	1	27.5524	GI_38090406-S	XM_354536.1		GI_38090406
Ube2l3	1040.1	1430.9	1	1	27.556	scl48709.7_108-S	XM_148568.1	C79827;Ubce7;UbcM4	scl48709.7_108
Ccng1	129.3	216.7	0.9994	1	27.5665	scl0012450.2_17-S	NM_009831.1	Ccng;cyclin G	scl0012450.2_17
2700084L06Rik	806.3	1121.7	1	1	27.5697	scl0078334.1_222-S	NM_198164.1	mKIAA1028	scl0078334.1_222
Iap	4451.1	6102.3	1	1	27.64	GI_24475922-S	NM_010490.2		GI_24475922
Mrps12	583.4	1049.1	1	1	27.645	scl0024030.2_121-S	NM_011885.2	Rpms12;rps12	scl0024030.2_121
	175.9	250.6	1	1	27.6535	scl0001869.1_367-S	AK051443.1		scl0001869.1_367
Pip5k2a	2647.7	3635.3	1	1	27.7346	scl19617.10_166-S	NM_008845.2		scl19617.10_166
Npm3	124.8	208.7	0.9994	1	27.7783	scl29824.1.5_102-S	NM_008723.1	Nub1	scl29824.1.5_102
Hpxn	133.8	841	0.9994	1	27.799	scl30885.8.9_59-S	NM_017371.1	hx	scl30885.8.9_59
Ppp1r2	235.4	331.5	1	1	27.811	scl0066849.1_145-S	NM_025800.1	0610025N14Rik;2310007G06Rik;4930440J04Rik;5430408E15Rik;D16Ertd248e;IPP-2	scl0066849.1_145
Stard4	198.2	318.8	1	1	27.8336	scl00170459.2_123-S	NM_133774.2	4632419C16Rik;9030213J02Rik	scl00170459.2_123
Mrps31	293.9	414.3	1	1	27.8397	scl000735.1_34-S	NM_020560.1	1500002D03Rik;Imogen38;Imogen44	scl000735.1_34
Agps	162.7	232.6	1	1	27.8401	scl20743.21_355-S	NM_172666.2	5832437L22;9930035G10Rik;ADAP-S;ADAS;ADHAPS;ADPS;ALDHPSY	scl20743.21_355
Arhgap22	62.1	97.1	0.9963	0.9994	27.8911	scl46468.16.1_298-S	NM_153800.2	B230341L19Rik;MGC47316;RHOGAP2	scl46468.16.1_298
A530083M17Rik	18.8	67.7	0.9757	0.9981	27.8957	scl21376.1.1211_204-S			scl21376.1.1211_204
2010106G01Rik	128.3	188.9	0.9994	1	27.8961	scl0066552.1_146-S	NM_023220.1	C130089K23Rik	scl0066552.1_146
Tpm4	78.7	137.3	0.9981	1	27.9239	scl0326618.2_3-S	XM_134274.3		scl0326618.2_3
Lass2	461.2	641	1	1	27.9576	scl22884.7.1_23-S	NM_029789.1	0610013I17Rik;TRH3	scl22884.7.1_23
BC038311	269.1	377.9	1	1	27.9622	scl26399.6.849_28-S	XM_485640		scl26399.6.849_28
BC005682	154.9	262.7	0.9994	1	27.9679	scl0001335.1_10-S	NM_033562.2	CGI-101;F-lana;Flana;MGC11613	scl0001335.1_10
Cnot7	448.2	676.8	1	1	28.0419	scl000572.1_890-S	NM_011135.2	Caf1;Pop2	scl000572.1_890
2210021J22Rik	10.1	62.9	0.9295	0.9975	28.0917	scl46876.5.1_23-S	NM_197998		scl46876.5.1_23
Taf12	286	421.7	1	1	28.1974	scl0002853.1_7-S	NM_025579.1	20kDa;2810422D08Rik;Taf2J	scl0002853.1_7
Plod3	1066.9	1522.4	1	1	28.205	scl27109.17.1_35-S	NM_011962.2	LH3	scl27109.17.1_35
Zfp637	590	851.3	1	1	28.2159	scl29584.3_468-S	NM_177684.2		scl29584.3_468
Ard1	1007.4	1490.1	1	1	28.2392	scl056292.1_247-S	NM_019870.1	2310039H09Rik;Te2	scl056292.1_247
Cstf2	298.4	490.4	1	1	28.2467	scl54639.14_151-S	NM_133196.3	64kDa;C630034J23Rik;Cstf64	scl54639.14_151
Hp	218.4	492	1	1	28.3404	scl000592.1_8-S	NM_017370.1		scl000592.1_8
Pltp	59.3	133.8	0.9963	1	28.3428	scl0003032.1_86-S	NM_011125.1		scl0003032.1_86
Nme7	153.4	223.9	0.9994	1	28.404	scl17280.16.5_29-S	NM_138314.1	D530024H21Rik;Nm23-M7;Nm23-r7	scl17280.16.5_29
Mgst1	72.8	174.4	0.9975	1	28.4232	scl29411.4.6_15-S	NM_019946.3	1500002K10Rik;Gst	scl29411.4.6_15
Hspd1	169.5	326.9	1	1	28.4624	scl000928.1_86-S	NM_010477.2	60kDa;Hsp60	scl000928.1_86
Apom	29.4	151.2	0.9894	1	28.4777	scl49994.7.1_30-S	NM_018816	1190010O19Rik;G3a;NG20	scl49994.7.1_30
Eif5a	1869.2	3000.5	1	1	28.554	scl00276770.1_2-S	NM_181582.2	D19Wsu54e;MGC6725	scl00276770.1_2
Nsun2	36.2	77	0.9913	0.9994	28.7854	scl44653.22_369-S	NM_145354.2		scl44653.22_369
X83328	205.2	292.4	1	1	28.7886	scl013929.8_8-S	NM_025275.2	ESTM12	scl013929.8_8
Ticam2	59.6	94.9	0.9963	0.9994	28.827	scl51432.3_551-S	NM_173394.2		scl51432.3_551
Ndg2	818.7	1182.3	1	1	28.9175	scl38757.5.1_81-S	NM_175329.3		scl38757.5.1_81
Trim30	0.6	34.6	0.6051	0.9931	28.9351	scl020128.1_60-S	NM_009099	Rpt-1;Rpt1	scl020128.1_60
Mif	924.8	1298.2	1	1	28.9995	GI_6754695-I	NM_010798.1	GIF;Glif	GI_6754695
LOC277856	82.6	125.5	0.9988	1	29.0048	GI_38049697-S	XM_204210.2		GI_38049697
Paf53	268.9	380.7	1	1	29.0882	scl0064424.2_263-S	NM_022811.1	53kDa;AU042259;D030019D19Rik	scl0064424.2_263
Tbrg4	650.4	1124.3	1	1	29.0897	scl40534.12.1_29-S	NM_134011.1	2310042P22Rik;AA408001;Cpr2;mKIAA0948;TB-12	scl40534.12.1_29
Atp6a1	98.8	154.4	0.9994	1	29.1124	GI_20892558-S	XM_147267.1	Atp6a2	GI_20892558
Lig3	96.1	143.9	0.9994	1	29.131	scl0016882.2_141-S	NM_010716.1	D11Wsu78e	scl0016882.2_141
Cps1	39.1	239.4	0.9944	1	29.1436	scl0227231.17_168-S	XM_129769		scl0227231.17_168
2210410E06Rik	731.4	1094.2	1	1	29.157	scl30406.1.1_4-S			scl30406.1.1_4
DXImx40e	577.6	826.2	1	1	29.1738	scl54450.17.1_6-S	NM_138603.2	Sfc22	scl54450.17.1_6
2610002D18Rik	11.5	77.2	0.9357	0.9994	29.1897	scl24844.4_405-S	XM_131720.2		scl24844.4_405
Vps29	287.2	406.2	1	1	29.1966	scl0004181.1_42-S	NM_019780.1	2010015D08Rik;PEP11	scl0004181.1_42
Psmc4	1349.3	2011.1	1	1	29.2874	scl31589.11.1_58-S	NM_011874.1	CIP21;MIP224	scl31589.11.1_58
E430003D02Rik	52.2	119.9	0.9963	0.9994	29.383	ri|E430003D02|PX00096C07|AK088068|2838-S	AK088068		ri|E430003D02|PX00096C07|AK088068|2838
Slc9a1	511.8	717.7	1	1	29.4433	scl24865.12_18-S	NM_016981	Apnh;Nhe1;swe	scl24865.12_18
BC025546	175.2	252.6	1	1	29.4756	scl33327.2_154-S	NM_146215.2	C730036L12Rik;MGC38131	scl33327.2_154
Bcl6	473.8	739.6	1	1	29.5864	scl48625.8_280-S	NM_009744.2	Bcl5	scl48625.8_280
Cdc45l	66.4	159.8	0.9975	1	29.5906	scl0001902.1_2-S	NM_009862.1		scl0001902.1_2
Blvra	515.1	792.3	1	1	29.6432	scl20330.11.1_76-S	NM_026678.3	0610006A11Rik;2500001N03Rik;Blvr	scl20330.11.1_76
Card15	16.5	47.1	0.9657	0.9956	29.7221	scl00257632.2_203-S	NM_145857.1	ACUG;BLAU;CD;F830032C23Rik;IBD1;Nod2	scl00257632.2_203
2310037P21Rik	177.7	261.5	1	1	29.7355	scl35175.1.186_300-S	NM_001002267		scl35175.1.186_300
Mbnl1	2607.5	3632.4	1	1	29.8591	scl23145.17_313-S	NM_020007.2	Mbnl;mKIAA0428	scl23145.17_313
Dusp1	815.4	1334.7	1	1	29.9199	scl50147.4_283-S	NM_013642.1	3CH134;erp;mkp-1;Ptpn16	scl50147.4_283
Cul3	538.8	757.6	1	1	29.9243	scl0026554.2_150-S	NM_016716.2		scl0026554.2_150
6720458F09Rik	509	730	1	1	29.9396	scl42747.5_440-S	NM_177374.2		scl42747.5_440
Ttc13	839.2	1201.7	1	1	29.9422	scl0234875.1_259-S	XM_358379.1		scl0234875.1_259
Bcs1l	265.7	378.7	1	1	29.962	scl17795.8.1_1-S	NM_025784.2	9130022O19Rik	scl17795.8.1_1
Il3ra	109.5	178.2	0.9994	1	29.963	scl46617.10.1_4-S	NM_008369.1	CD123;CDw123;SUT-1	scl46617.10.1_4
Lsm10	635.7	892.6	1	1	29.9677	scl0116748.2_296-S	NM_138721.1		scl0116748.2_296
Kcnab2	996.5	1406.2	1	1	30.0303	scl23461.27_162-S	NM_010598.2	F5;I2rf5;Kcnb3	scl23461.27_162
Capn10	51.3	84.5	0.9963	0.9994	30.0595	scl023830.13_151-S	NM_011796.1	Capn8;mKIAA1845	scl023830.13_151
Cln5	776	1088.4	1	1	30.0727	scl46010.5_526-S	XM_127882.3		scl46010.5_526
Sssca1	968.9	1358.1	1	1	30.2156	scl0056390.1_292-S	NM_020491	1500016H19Rik;C184L	scl0056390.1_292
Snrpa	227.1	325.8	1	1	30.2179	scl0053607.2_231-S	NM_015782.2	Rnu1a-1;Rnu1a1;U1A	scl0053607.2_231
D3Ertd194e	558.7	850.2	1	1	30.2781	scl0002016.1_29-S	XM_130881.3		scl0002016.1_29
Hnrpa2b1	1880	2945	1	1	30.3429	scl0053379.2_22-S	NM_182650.2	9130414A06Rik;hnrnp-A;Hnrpa2	scl0053379.2_22
F2rl2	40.7	92	0.9944	0.9994	30.3863	scl44500.2_38-S	NM_010170.2	F730031A08;PAR3	scl44500.2_38
2810008M24Rik	473.1	668.5	1	1	30.3977	scl44416.3_31-S			scl44416.3_31
2310004K06Rik	137.5	203.5	0.9994	1	30.4324	scl000137.1_6-S	NM_020050.1	D7H11orf15;ICRFP703B1614Q5.3	scl000137.1_6
Bach	468.8	675.7	1	1	30.486	scl24656.12.1_25-S	NM_133348.1	2410041A17Rik;ACH1;ACT;CTE-II;LACH1	scl24656.12.1_25
Mup1	914.8	3564.6	1	1	30.5436	scl0017840.1_66-S	NM_031188	2610016E04Rik;Ltn-1;Lvtn-1;Mup-1;Mup-a;Up-1	scl0017840.1_66
Mrpl17	1603.9	2400.8	1	1	30.6361	scl027397.1_17-S	NM_025301.1	MRP-L26;Rpml26	scl027397.1_17
Slc41a3	40.5	83.5	0.9944	0.9994	30.6466	scl29748.13.473_11-S	XM_132686.3		scl29748.13.473_11
Strap	389.3	804.2	1	1	30.8805	scl29414.11.4_112-S	NM_011499.1		scl29414.11.4_112
Fars1	670.4	971.1	1	1	30.8884	scl44903.11.3_96-S	NM_024274.1	2810431B21Rik;6720478K01Rik	scl44903.11.3_96
D10Ertd322e	387.4	584.5	1	1	30.9185	scl067270.3_15-S	NM_026065.2		scl067270.3_15
Erp29	3876.5	5435.8	1	1	30.9578	scl067397.1_307-S	NM_026129.2	1200015M03Rik;2810446M09Rik;Erp28;Erp31;PDI-Db	scl067397.1_307
D3Ertd194e	694.5	1013.4	1	1	31.0553	scl23164.14.1_82-S	XM_130881.3		scl23164.14.1_82
2510005D08Rik	113.1	174.6	0.9994	1	31.0798	scl45489.6.1_24-S	NM_026526.1		scl45489.6.1_24
Naca	408.3	698.8	1	1	31.103	scl0017938.1_31-S	NM_013608.2	mKIAA0363;skNAC	scl0017938.1_31
Actr1a	1202	1692.9	1	1	31.1156	scl52406.11.1_60-S	NM_016860.1	alpha-Arp1;Arp1	scl52406.11.1_60
Rbbp7	426	765.6	1	1	31.2454	scl00245688.1_91-S	NM_009031.2	mRbAp46	scl00245688.1_91
Prkrir	309.5	446.9	1	1	31.2662	scl0072981.1_191-S	NM_028410.1	2900052B10Rik;Dap4;MGC31389;Rpkrir	scl0072981.1_191
AI586015	254.2	433.7	1	1	31.2739	scl0004037.1_2-S	NM_019992.2	Brdg1;STAP-1	scl0004037.1_2
Tank	410.8	585.3	1	1	31.313	scl0003091.1_92-S	NM_011529.1	E430026L09Rik;I-TRAF	scl0003091.1_92
1110032D12Rik	1882.4	2653.3	1	1	31.347	scl056334.4_3-S	NM_019770	1810020N21Rik;Rnp24;Sid394	scl056334.4_3
Pter	35.4	70	0.9913	0.9994	31.3565	scl0019212.2_101-S	NM_008961.1	Mpr56-1	scl0019212.2_101
Rab6	23.1	55.8	0.9844	0.9969	31.3588	scl00030.1_17-S	BC019118	2610028L11Rik	scl00030.1_17
Hsd11b1	609.3	940.5	1	1	31.3634	scl000857.1_11-S	NM_008288.1		scl000857.1_11
Sf3a3	1140.8	1631.5	1	1	31.3713	scl24988.17.1_42-S	NM_029157.2	4930512K19Rik;60kDa	scl24988.17.1_42
Pik3cb	359.6	598	1	1	31.4028	scl35462.25_609-S	NM_029094.1	1110001J02Rik;p110beta	scl35462.25_609
Actr10	315.8	452.6	1	1	31.4221	scl056444.13_2-S	NM_019785.1	Actr11;Arp11	scl056444.13_2
Drbp1	39.9	100	0.9944	0.9994	31.4347	GI_23510272-A	NM_153405.1	Drb1;G430095G15Rik	GI_23510272
LOC380634	240.1	389.3	1	1	31.4606	GI_38090481-S	XM_354540.1		GI_38090481
Stx11	6.3	29.4	0.8509	0.9906	31.6356	scl0003779.1_7-S	XM_203312.2		scl0003779.1_7
1110017C15Rik	442.8	636.8	1	1	31.6475	scl000639.1_71-S	NM_025391.1		scl000639.1_71
2310039H08Rik	547.9	821.2	1	1	31.6912	scl50670.2.184_270-S	NM_025966.2		scl50670.2.184_270
Gpr171	154.7	270.8	0.9994	1	31.7006	scl22124.2_66-S	NM_173398.1		scl22124.2_66
5830427H10Rik	822.2	1165.9	1	1	31.7834	scl29632.2_358-S	NM_026365.1		scl29632.2_358
Cul4b	157.4	232.2	1	1	31.8666	scl072584.1_264-S	NM_028288.3	2700050M05Rik	scl072584.1_264
Ap1s2	32.7	62.1	0.9906	0.9975	31.8754	scl54492.8.1_0-S	NM_026887	1500012A13Rik;EST1	scl54492.8.1_0
Hadhb	132.2	206.2	0.9994	1	31.9505	scl0004026.1_20-S	NM_145558	4930479F15Rik;Mtpb	scl0004026.1_20
Eif3s7	2758.5	4093	1	1	31.9559	scl46998.15.1_4-S	NM_018749	66/67kDa;eIF3p66	scl46998.15.1_4
Uox	11.4	75.8	0.937	0.9994	32.0536	scl22477.8.1_16-S	NM_009474.3		scl22477.8.1_16
LOC194913	6933.8	9951.8	1	1	32.1516	GI_38091627-S	XM_110926.2		GI_38091627
Srm	402.4	739.4	1	1	32.2791	scl0002839.1_0-S	NM_009272.2	SpdSy	scl0002839.1_0
Klrb1d	11.6	40.9	0.937	0.995	32.3104	scl080782.1_76-S	NM_030599.3	Ly55d;NKR-P1D	scl080782.1_76
Thap4	12	40.1	0.937	0.995	32.3195	scl16458.7.1_28-S	NM_025920	2010320B01Rik	scl16458.7.1_28
1810011E08Rik	1841.9	2610.9	1	1	32.365	scl34807.5_39-S			scl34807.5_39
4632417K18Rik	950.1	1392.9	1	1	32.4058	scl53341.4_558-S	NM_026640.1		scl53341.4_558
Scfd2	119.4	188.2	0.9994	1	32.4477	scl26469.13.1_53-S	NM_178672	9330137G15;E430013M20Rik;STXBP1L1	scl26469.13.1_53
Nme7	13.3	37.1	0.9501	0.9944	32.5181	scl000958.1_18-S	NM_178071.2	D530024H21Rik;Nm23-M7;Nm23-r7	scl000958.1_18
Poldip2	680.3	1090	1	1	32.531	scl41198.10_516-S	NM_026389.2	1300003F06Rik;Pdip38	scl41198.10_516
Rars	270.5	392.3	1	1	32.5345	scl40361.13.1_2-S	NM_025936.1	2610011N19Rik;2610037E21Rik;AL033339	scl40361.13.1_2
2610028L19Rik	123.3	186	0.9994	1	32.8523	scl0002272.1_96-S	NM_027002.1	2310002G05Rik	scl0002272.1_96
Ppil3	285.2	413.9	1	1	32.877	scl16732.7.1_6-S	NM_027351.1	2310076N22Rik;2510026K04Rik;Cyp10l	scl16732.7.1_6
Ppap2c	155.1	230.6	0.9994	1	32.9256	scl37761.6_244-S	NM_015817	Lpp2	scl37761.6_244
Fcrl3	2306.7	9679.3	1	1	32.9414	scl17239.5.1_240-S	NM_144559.1	4833442P21Rik;CD16-2	scl17239.5.1_240
Glyat	27.5	88.2	0.9888	0.9994	32.9421	scl00107146.2_299-S	NM_145935.2	A330009E03Rik;ACGNAT;AI315345;CAT;GAT	scl00107146.2_299
Dscr1	347.4	579.1	1	1	33.0458	scl48193.7_228-S	NM_019466.2	2410048A02Rik;Adapt78;CALP1L;MCIP1	scl48193.7_228
Pitpnb	480.2	690.8	1	1	33.085	scl27424.11_172-S	NM_019640.2		scl27424.11_172
D430004H20Rik	73.4	127.8	0.9975	1	33.1208	ri|D430004H20|PX00193A23|AK084869|758-S	AK084869		ri|D430004H20|PX00193A23|AK084869|758
Umps	172	316.8	1	1	33.1316	scl0001911.1_22-S	NM_009471.1		scl0001911.1_22
Defcr-rs7	7.3	31.3	0.8746	0.9913	33.213	scl0013226.1_138-S	NM_007848.1	CRS4C-2	scl0013226.1_138
Elac2	110.6	168.8	0.9994	1	33.2581	scl41427.25.1_159-S	NM_023479.1	1110017O07Rik;D11Wsu80e;Hpc2	scl41427.25.1_159
Vps26	549.9	790.7	1	1	33.3138	scl37899.10_160-S	NM_133672	HB58	scl37899.10_160
Mrpl15	181.4	299.2	1	1	33.4143	ri|1110003K01|R000013G06|AK003367|1004-S	AK003367	HSPC145;MRP-L7;Rpml7	ri|1110003K01|R000013G06|AK003367|1004
Plrg1	562.3	992.5	1	1	33.6395	scl23055.15.1_74-S	NM_016784.2		scl23055.15.1_74
Gdi3	617	2562.4	1	1	33.6629	scl014569.11_60-S	NM_008112.2	GDI-B;GDIB	scl014569.11_60
6720467C03Rik	117.9	180.4	0.9994	1	33.7846	scl24545.4.1_12-S	NM_026558.2		scl24545.4.1_12
Ruvbl1	231.7	404	1	1	33.8237	scl0056505.1_79-S	NM_019685.1	2510009G06Rik;Pontin52;Tip49a	scl0056505.1_79
Ppp2r5d	519.6	750.1	1	1	33.8256	scl000094.1_33-S	NM_009358.2	TEG-271;Tex271	scl000094.1_33
Nup93	784.5	1171.4	1	1	33.8677	scl0071805.2_3-S	NM_172410.1	2410008G02Rik	scl0071805.2_3
Abcg1	1212.2	1739.7	1	1	34.0233	scl0011307.2_72-S	NM_009593.1	Abc8;White	scl0011307.2_72
Tomm70a	97.5	151.5	0.9994	1	34.0542	scl49022.13_219-S	NM_138599		scl49022.13_219
1110064N10Rik	455.4	759.6	1	1	34.1195	scl47395.9.8_1-S	NM_026396.2		scl47395.9.8_1
Got2	1758.8	2522.2	1	1	34.1545	scl0014719.1_330-S	NM_010325.1	FABP-pm;Got-2;mAspAT	scl0014719.1_330
Cnot7	30.6	60.8	0.9894	0.9975	34.2429	ri|1810044B19|ZX00043A03|AK007767|732-S	AK007767	Caf1;Pop2	ri|1810044B19|ZX00043A03|AK007767|732
Litaf	1125.4	1618.4	1	1	34.282	scl0056722.2_11-S	NM_019980.1	3222402J11Rik;N4WBP3;TBX1	scl0056722.2_11
D17Wsu104e	263.8	397.9	1	1	34.3042	scl028106.1_129-S	NM_080837.1	Il25;Ly6elg;SF20/IL-25	scl028106.1_129
2610020N02Rik	69.6	113	0.9975	0.9994	34.3973	scl38191.11.1_70-S	NM_181470.2		scl38191.11.1_70
Znhit2	304.2	445.6	1	1	34.505	scl52858.1.11_122-S	NM_013859.1		scl52858.1.11_122
Gsto1	743.8	1204.2	1	1	34.5221	scl53077.5.8_20-S	NM_010362.1	GSTX;p28	scl53077.5.8_20
Nup210	2410.7	3462.9	1	1	34.5706	scl28688.42_395-S	NM_018815.1	9830001L10;gp190;gp210;Pom210	scl28688.42_395
AA691260	656.2	1012.4	1	1	34.5877	scl00100017.2_199-S	NM_145554.1	Arh1;ARH2;FHCB1;FHCB2	scl00100017.2_199
Rgs1	205.6	364.6	1	1	34.6364	scl0050778.2_103-S	NM_015811.1	BL34	scl0050778.2_103
Stk17b	918.7	1470.9	1	1	34.6811	scl16765.7_355-S	NM_133810.2	3110009A03Rik;Drak2	scl16765.7_355
Vapb	39.9	74.5	0.9944	0.9994	34.7146	scl056491.5_30-S	NM_019806.3	D2Abb2e;Vamp33b;VAP33b	scl056491.5_30
Gtf2e1	307.7	451.2	1	1	34.7347	scl48494.5_274-S	NM_028812.1	2610024P03Rik;56kDa;AI303800;FE;TFIIE-A	scl48494.5_274
Adfp	270.3	401.4	1	1	34.8501	scl24151.12.434_2-S	NM_007408.2	ADPH;Adrp	scl24151.12.434_2
Car3	22.9	59.3	0.9838	0.9969	34.8742	scl012350.2_21-S	NM_007606.2	Car-3	scl012350.2_21
Acaa2	180.8	310	1	1	34.8761	scl0002198.1_20-S	NM_177470.2	0610011L04Rik;D18Ertd240e	scl0002198.1_20
F2rl3	76.2	137.8	0.9975	1	34.8812	scl33668.2_157-S	NM_007975.2	PAR4	scl33668.2_157
Smpdl3b	52	437.7	0.9963	1	34.9927	scl23726.8.8_267-S	NM_133888.1	1110054A24Rik;Asml3b	scl23726.8.8_267
Mrpl11	445.2	649.5	1	1	35.0922	scl52826.3.1_11-S	NM_025553.1	2410001P07Rik	scl52826.3.1_11
0610039D01Rik	594.1	863.4	1	1	35.0974	scl50143.3.1_18-S	NM_026307.2	1810022E02Rik;1810060C03Rik;2700094G22Rik	scl50143.3.1_18
E330036I19Rik	481	701.3	1	1	35.1598	scl0231871.16_33-S	NM_144915.2	MGC27690	scl0231871.16_33
Skb1	916.6	1353.9	1	1	35.2644	scl45569.16_259-S	NM_013768	Jbp1	scl45569.16_259
6720485C15Rik	478	697.5	1	1	35.2905	scl068087.1_272-S	NM_026551.2		scl068087.1_272
Sssca1	319	543.1	1	1	35.5341	scl056390.4_41-S	NM_020491.3	1500016H19Rik;C184L	scl056390.4_41
2310045N01Rik	441.7	646.3	1	1	35.5414	scl072368.4_40-S	XM_486121		scl072368.4_40
Grsf1	212.3	316.8	1	1	35.571	scl26406.12_265-S	NM_178700.2	B130010H02;D5Wsu31e	scl26406.12_265
Bzw2	430.5	640.4	1	1	35.5793	scl42528.12.1_19-S	NM_025840.2	1110001I24Rik;HSPC028;MGC7203	scl42528.12.1_19
Ndufs5	1180.1	1723.1	1	1	35.8087	scl0170658.2_22-S	XM_355517.1		scl0170658.2_22
2810409H07Rik	233.4	355	1	1	35.8349	GI_76677914-A	NM_030091.1	2510025G09Rik;2810405J23Rik;PTD004	GI_76677914
5430417L22Rik	561.9	913.5	1	1	35.8373	scl20442.1.104_164-S			scl20442.1.104_164
Hrsp12	231.7	440.4	1	1	35.9282	scl015473.5_18-S	NM_008287.2	HR12;HRP12	scl015473.5_18
Ms4a6d	1.2	36.4	0.6469	0.9944	35.975	scl52722.6.1_6-S	NM_026835.1	1110058E16Rik	scl52722.6.1_6
Gtf2h1	920.9	1556.8	1	1	35.9879	scl32648.17_169-S	NM_008186.2	62kDa;p62	scl32648.17_169
Hnrpk	734.1	1196.8	1	1	36.0183	scl0003727.1_2-S	NM_025279.1	NOVA	scl0003727.1_2
LOC381865	1013.6	1474.7	1	1	36.0358	GI_38086208-S	XM_355879.1		GI_38086208
LOC381947	276.7	417.6	1	1	36.0714	GI_38087874-S	XM_355970.1		GI_38087874
Scarb1	1079	1581	1	1	36.1302	scl020778.1_265-S	NM_016741.1	CD36;Cd36l1;Cla-1;Cla1;D5Ertd460e;mSR-BI;SR-BI;Srb1;SRBI	scl020778.1_265
Sypl	562.7	853.5	1	1	36.158	scl0019027.2_109-S	NM_013635.2	D12Ertd446e;Pan I;Pphn	scl0019027.2_109
Itih4	93.6	435.9	0.9994	1	36.2111	scl46504.23.1_106-S	NM_018746.1	Itih-4	scl46504.23.1_106
Hdac1	522	765.8	1	1	36.3472	scl015181.3_0-S	NM_008228.1	HD1;RPD3	scl015181.3_0
1810043M15Rik	129.1	198.9	0.9994	1	36.3875	scl075678.13_86-S	NM_199056.1		scl075678.13_86
Rbbp7	372.9	678.5	1	1	36.3908	scl0245688.1_74-S	NM_009031.2	mRbAp46	scl0245688.1_74
Adsl	185.5	280.2	1	1	36.597	scl0011564.2_163-S	NM_009634.3		scl0011564.2_163
2810405I11Rik	324.8	489.6	1	1	36.696	scl0067064.2_260-S	NM_024190.1		scl0067064.2_260
Acaa2	175.2	289.7	1	1	36.699	scl0002163.1_25-S	NM_177470	0610011L04Rik;D18Ertd240e	scl0002163.1_25
0610041E09Rik	77.9	138.7	0.9981	1	36.7582	scl0066074.2_236-S	NM_025335.1	5730424F14Rik	scl0066074.2_236
Mrpl38	647.5	950.4	1	1	36.8482	scl39316.7.1_30-S	NM_024177.2	4733401F03Rik;MGC41062;MGC8310;MRP-L3;Rpml3	scl39316.7.1_30
Rbm8	45	101.6	0.995	0.9994	36.886	scl0060365.1_251-S	NM_025875.1	2310057C03Rik	scl0060365.1_251
Mtx1	1009.6	1487.5	1	1	37.005	scl21950.8.1_214-S	NM_013604.1	Gcap6;Mtx	scl21950.8.1_214
Clec4a3	310.2	731	1	1	37.2227	GI_54291705-S	NM_153197.2	3110037K17Rik;Dcir3;mDcir3	GI_54291705
Nfil3	160.1	262.7	1	1	37.2626	scl43966.3_250-S	NM_017373.2	E4BP4	scl43966.3_250
Gpiap1	176.1	277.5	1	1	37.3217	scl0003202.1_259-S	NM_016739.2	Gpiap;MMGPIP137;P137	scl0003202.1_259
Fcer1g	1175.1	3538.2	1	1	37.3933	scl15940.5.1_15-S	NM_010185.2	CD23;Fce1g;FcR-gamma;FcR[g];Ly-50	scl15940.5.1_15
D2Bwg0891e	807	1186.1	1	1	37.4042	scl052840.5_2-S	NM_026797.1	1110017A21Rik;2900022J10Rik	scl052840.5_2
Elovl1	155.8	239	0.9994	1	37.4593	scl054325.6_160-S	NM_019422.1	Ssc1	scl054325.6_160
Etfa	2199.8	3221.3	1	1	37.6589	scl00110842.1_108-S	NM_145615.2	2010200I21Rik;D9Ertd394e	scl00110842.1_108
D5Ertd33e	520.7	829.6	1	1	37.7043	scl052064.7_271-S	NM_026504.1	1810014G04Rik	scl052064.7_271
AW125296	8.1	32.9	0.8964	0.9925	37.8065	scl26440.1.1796_1-S			scl26440.1.1796_1
Smn1	879.8	1407.1	1	1	38.2736	scl44463.11.22_177-S	NM_011420.1		scl44463.11.22_177
2700017M01Rik	559.4	864.3	1	1	38.4208	scl30988.16_625-S	NM_028292.1	1110069N17Rik;Pme1	scl30988.16_625
LOC381490	241.2	365.2	1	1	38.5702	GI_38077558-S	XM_355443.1		GI_38077558
Ifitm2	1631.9	2405.6	1	1	38.5894	scl080876.2_10-S	NM_030694	fragilis3;Ifitm3l;mil-3	scl080876.2_10
Sfrs10	350.1	611.9	1	1	38.6032	scl0001867.1_58-S	NM_009186	SIG-41;Silg41;TRA2B;TRA2beta	scl0001867.1_58
Rhoa	1667.8	2459.2	1	1	38.6507	scl011848.5_0-S	NM_016802	Arha;Arha1;Arha2	scl011848.5_0
2010317E24Rik	75.4	139.5	0.9975	1	38.6695	scl072080.6_214-S	XM_130053.2		scl072080.6_214
Hsd3b7	633.6	953.1	1	1	38.674	scl00101502.1_299-S	NM_133943.1		scl00101502.1_299
Znhit1	166.3	259.7	1	1	39.0797	scl25890.5.9_30-S	XM_357515.1		scl25890.5.9_30
Csnk2a2	694.4	1033.4	1	1	39.2315	scl013000.1_10-S	NM_009974.2	1110035J23Rik;CK2	scl013000.1_10
Alox12	374.5	931.7	1	1	39.3218	scl39999.14.1_8-S	NM_007440.2	9930022G08Rik;Alox12p;P-12LO	scl39999.14.1_8
Il4i1	1009	1526.6	1	1	39.4646	scl014204.4_298-S	NM_010215.1	Fig1;Fig1-ps	scl014204.4_298
C230098O21Rik	36.3	74.2	0.9913	0.9994	39.5082	scl15510.1.1_178-S			scl15510.1.1_178
Adam17	278.2	421.7	1	1	39.5263	scl0011491.1_129-S	NM_009615.4	CD156b;Tace	scl0011491.1_129
Psma1	1202.8	1785.7	1	1	39.5424	scl000176.1_12-S	NM_011965	C2	scl000176.1_12
1110060F11Rik	536.6	804	1	1	39.8655	scl0002748.1_8-S	NM_026395.1	5830454N22Rik	scl0002748.1_8
Gcet2	73.8	180.3	0.9975	1	39.9772	scl49057.5_195-S	NM_008099.2		scl49057.5_195
2310042P20Rik	51.1	102.1	0.9963	0.9994	40.056	scl071919.4_35-S	NM_028003.1	D15Ertd682e	scl071919.4_35
Chordc1	755.1	1128.9	1	1	40.1464	scl066917.11_233-S	NM_025844.1	1110001O09Rik;Chp-1	scl066917.11_233
Ccng1	49.7	92.1	0.9963	0.9994	40.5481	scl0001479.1_77-S	NM_009831.1	Ccng;cyclin G	scl0001479.1_77
LOC381054	347.1	544.3	1	1	41.2397	GI_38080026-S	XM_354969.1		GI_38080026
Drbp1	142.5	277.8	0.9994	1	41.334	scl0003137.1_53-S	NM_178090.2	Drb1;G430095G15Rik	scl0003137.1_53
Papola	88.5	146.5	0.9994	1	41.5894	scl0018789.1_2-S	NM_011112.1	PAP;PapIII;Plap	scl0018789.1_2
Trpv2	524.1	794.5	1	1	41.7698	scl41448.13.1_85-S	NM_011706.1	GRC;Vrl1	scl41448.13.1_85
Car13	57.2	101.6	0.9963	0.9994	41.9111	scl23381.7.1_35-S	NM_024495.2	2310075C21Rik	scl23381.7.1_35
Ccnd2	425.1	672	1	1	41.928	scl28384.6_282-S	NM_009829.2	2600016F06Rik;Vin-1;Vin1	scl28384.6_282
BC018399	169.6	282.9	1	1	42.1104	scl39832.12.1_105-S	NM_145431	MGC25690;Nle;notchless	scl39832.12.1_105
1700034H14Rik	186.4	293.1	1	1	42.3177	scl067105.6_6-S	NM_025969.1	2700002I20Rik	scl067105.6_6
Psma7	1192.1	1799.2	1	1	42.3439	scl18232.3.7_30-S	NM_011969.1	C6-I	scl18232.3.7_30
Uchl5	70.6	140.3	0.9975	1	42.4906	scl000968.1_12-S	NM_019562.1	5830413B11Rik;Uch37	scl000968.1_12
Mtch2	582.6	886.1	1	1	42.5723	scl0056428.2_17-S	NM_019758.2	2310034D24Rik;4930539J07Rik;HSPC032	scl0056428.2_17
Rap1b	1582.2	2391.1	1	1	42.8287	scl0215449.1_111-S	NM_024457.1	2810443E11Rik	scl0215449.1_111
LOC381327	360.4	573.5	1	1	42.8343	GI_38074106-S	XM_355282.1		GI_38074106
Magmas	204.5	320.2	1	1	42.9752	scl0001814.1_15-S	NM_025571.1	2010110I09Rik;CGI-136	scl0001814.1_15
Gnaz	137.4	303.4	0.9994	1	43.0754	GI_31981746-S	NM_010311.2	AI847979;Gz	GI_31981746
Aqp8	6.2	33.2	0.8503	0.9925	43.7023	scl32080.5_1-S	NM_007474.1		scl32080.5_1
0610033H09Rik	607.3	930.5	1	1	43.9371	scl24605.2.1_63-S	NM_025338.1	AIP	scl24605.2.1_63
Dpp3	1370	2090.5	1	1	44.4002	scl0075221.1_274-S	NM_133803.1	4930533O14Rik	scl0075221.1_274
Tpi1	68.1	120	0.9975	0.9994	44.4612	scl0021991.1_26-S	NM_009415.1		scl0021991.1_26
Sdcbp	825.2	1264.7	1	1	44.5596	scl0053378.2_54-S	NM_016807.1	Sycl	scl0053378.2_54
4930481A15Rik	6.2	36.5	0.8453	0.9938	44.6601	scl074931.4_20-S	XM_148889.4		scl074931.4_20
Mrpl40	500.4	845	1	1	44.8132	scl48676.4_117-S	NM_010922.1	Nlvcf	scl48676.4_117
Gtf2f2	520.6	803.5	1	1	44.8486	scl45293.12.6_30-S	NM_026816.1	1110031C13Rik	scl45293.12.6_30
Tce4	74.8	129.7	0.9975	1	44.9811	scl057354.1_85-S	XM_489778		scl057354.1_85
Psmd7	244.2	480.8	1	1	45.1069	scl000612.1_15-S	NM_010817.1	Mov-34;Mov34	scl000612.1_15
Mtpn	298	471.8	1	1	45.5879	scl29153.4_406-S	NM_008098.2	5033418D15Rik;Gcdp;V1	scl29153.4_406
LOC386333	23.2	56.2	0.9844	0.9969	45.6814	GI_38081438-S	XM_359174.1		GI_38081438
Smfn	110.6	190.4	0.9994	1	45.749	scl0003542.1_12-S	NM_024233.2	1810038D15Rik;Sfn	scl0003542.1_12
Pscdbp	2590	3987.4	1	1	46.4366	scl0227929.1_2-S	NM_139200.2	Cbp;CYTIP;tamalin	scl0227929.1_2
Cbx3	430.8	673.4	1	1	46.5123	scl012417.4_32-S	NM_007624	HP1g;M32	scl012417.4_32
Socs3	188.4	402.9	1	1	46.6653	scl39282.4_366-S	NM_007707.2	CIS3;Cish3;EF-10;SOCS-3;SSI-3	scl39282.4_366
Nt5c2	46.1	103.8	0.995	0.9994	46.7486	scl0076952.1_100-S	NM_029810.2	2010002I23Rik;cN-II;GMP;NT5B;PNT5	scl0076952.1_100
9630055N22Rik	333.7	527.3	1	1	47.3881	ri|9630055N22|PX00117E08|AK036315|3668-S	AK036315	9630055N22	ri|9630055N22|PX00117E08|AK036315|3668
Gp1bb	114.4	312.2	0.9994	1	47.8247	scl014724.1_74-S	NM_010327.1		scl014724.1_74
Zdhhc13	236.9	436.9	1	1	48.0568	scl32640.18.1_14-S	NM_028031.1		scl32640.18.1_14
Txnl4	684.4	1208.7	1	1	48.3366	scl027366.4_62-S	NM_025299.1	Dim1;U5-15kD;U5-15kDa	scl027366.4_62
Nubp2	418	713.2	1	1	49.3227	scl0001628.1_55-S	NM_011956.2	D17Wsu11e	scl0001628.1_55
9130422I10Rik	51.5	126.4	0.9963	1	50.3847	ri|9130422I10|PX00026H10|AK018686|876-S	AK018686		ri|9130422I10|PX00026H10|AK018686|876
Gemin6	120.3	235.9	0.9994	1	51.2074	scl0067242.1_20-S	NM_026053.1	2610019B15Rik;2810470M17Rik	scl0067242.1_20
Hsp105	370.8	642.3	1	1	51.4246	scl25735.19_37-S	NM_013559.1	105kDa;hsp-E7I;HSP110	scl25735.19_37
B230312I18Rik	10	45.6	0.9195	0.9956	51.8396	scl32830.4_10-S	NM_172740.1	B230119D13	scl32830.4_10
Cct4	2449.6	3888.6	1	1	52.1122	scl012464.14_38-S	NM_009837.1	A45;Cctd	scl012464.14_38
Gmds	189	314.3	1	1	52.6453	scl44126.11.1_57-S	NM_146041.1	MGC18773	scl44126.11.1_57
Ciapin1	38.9	82.4	0.9938	0.9994	52.9315	scl34467.10_352-S	NM_134141		scl34467.10_352
Clic4	861	1396	1	1	53.0999	scl029876.1_59-S	XM_124389.1	mc3s5;mtCLIC	scl029876.1_59
Slamf1	73.5	134.7	0.9975	1	53.1218	scl17218.7.1_11-S	NM_013730.2	4933415F16;CD150;CDw150;ESTM51;IPO-3;Slam	scl17218.7.1_11
Ccl4	127.9	229	0.9994	1	53.6479	scl41134.1_185-S	NM_013652	Act-2;AT744.1;MIP-1B;Mip1b;Scya4	scl41134.1_185
Rnpep	461.1	814.5	1	1	53.7293	scl16258.13.1_64-S	NM_145417	MGC29229	scl16258.13.1_64
Ipo11	96.8	174.7	0.9994	1	53.7369	scl43536.32_392-S	NM_029665.2	1700081H05Rik;2510001A17Rik;E330021B14Rik	scl43536.32_392
Eif1a	303.9	524.2	1	1	54.1019	scl51993.3_190-S	NM_010120.3	Ef1a;Eftu;eIF-1A;Eif4c	scl51993.3_190
Qprt	52.1	141.9	0.9963	1	54.1867	scl30662.5.1_110-S	NM_133686.1	2410027J01Rik;QPRTase	scl30662.5.1_110
Dars	257.6	513.1	1	1	54.8065	scl16334.7.1_2-S	NM_145507.1	5730439G15Rik	scl16334.7.1_2
Map3k6	15.1	49.8	0.9601	0.9956	55.1958	scl24866.28.1_30-S	NM_016693	MAPKKK6	scl24866.28.1_30
Batf	65.1	123.6	0.9969	1	55.5652	scl42955.2.1_6-S	NM_016767.1	B-ATF;SFA-2	scl42955.2.1_6
Mrpl48	150	339.7	0.9994	1	58.4519	scl000226.1_3-S	NM_026971.2	1810030E20Rik;2610028L11Rik;CGI-118;D4Ertd786e	scl000226.1_3
Pltp	21	60.2	0.98	0.9975	59.4291	scl0003117.1_12-S	NM_011125.1		scl0003117.1_12
2610524H06Rik	46.4	99.4	0.995	0.9994	59.5292	scl0330173.2_13-S	NM_181075.2		scl0330173.2_13
Ak2	209	372.2	1	1	60.1272	scl24926.6.1_18-S	NM_016895.2	Ak-2;D4Ertd220e	scl24926.6.1_18
Bdh	57.3	115.1	0.9963	0.9994	60.2682	scl0071911.2_148-S	NM_175177.3	2310032J20Rik	scl0071911.2_148
AI838661	39.5	342.6	0.9938	1	61.0051	scl24858.5.1_216-S	NM_133884.1		scl24858.5.1_216
Clec2	111.2	221.6	0.9994	1	61.4188	scl0001125.1_21-S	NM_019985.1	1810061I13Rik;Clec-2;mCLEC-2	scl0001125.1_21
Rab6	45.6	130.6	0.995	1	62.0383	scl00072.1_32-S	NM_024287.2	2610028L11Rik	scl00072.1_32
Psmb7	779.1	1315.3	1	1	62.82	scl19361.2.11_20-S	NM_011187.1	MC14	scl19361.2.11_20
Defcr-rs7	14	63.8	0.9532	0.9975	64.4807	GI_6681170-S	NM_007848.1	CRS4C-2	GI_6681170
G430091H17Rik	50.6	132.4	0.9963	1	65.4952	ri|G430091H17|PH00001H10|AK090072|2232-S	AK090072		ri|G430091H17|PH00001H10|AK090072|2232
9430098E02Rik	64.3	152.2	0.9963	1	65.7384	scl33704.1.431_29-S	XM_134253.3		scl33704.1.431_29
Pum2	216.1	387.9	1	1	68.4902	scl0080913.2_173-S	NM_030723.1	5730503J23Rik;mKIAA0235;Pumm2	scl0080913.2_173
Tpi1	1004	1743.6	1	1	68.6846	scl021991.1_200-S	NM_009415.1		scl021991.1_200
Gnb1l	216.3	394.7	1	1	71.8282	scl013972.9_310-S	NM_023120.1	ESTM55;Wdr14;Wdvcf	scl013972.9_310
0610039N19Rik	204.4	374.2	1	1	71.9272	scl29880.12.1_23-S	NM_026159.2	MMT-7	scl29880.12.1_23
Gspt1	1554.1	2753.2	1	1	74.1054	scl014852.1_8-S	NM_146066.1	G1st;Gst-1;MGC36230;MGC36735	scl014852.1_8
Sfrs10	82.8	168.8	0.9988	1	75.311	scl020462.9_41-S	NM_009186	SIG-41;Silg41;TRA2B;TRA2beta	scl020462.9_41
Pnrc2	9.3	165	0.9133	1	78.007	scl23667.4_0-S	NM_026383.1	0610011E17Rik;D4Bwg0593e;MGC11707	scl23667.4_0
Cygb	365.2	900.5	1	1	79.0394	scl39299.4_652-S	NM_030206.1	3110001K20Rik;HGb;Staap	scl39299.4_652
Mrpl3	174.3	334.3	1	1	79.4172	scl0003562.1_115-S	NM_053159.2	2010320L16Rik;5930422H18Rik	scl0003562.1_115
Rgl1	78	325.6	0.9975	1	81.3873	scl019731.1_197-S	NM_016846.2	Rgl	scl019731.1_197
Eif3s2	681.1	2565.2	1	1	90.8117	scl0002776.1_66-S	NM_018799	36kDa;D4Ertd632e;Trip1	scl0002776.1_66
2610001E17Rik	33.4	106.3	0.9906	0.9994	95.0767	scl517.1.1_243-S	NM_026439	Ssg1;Urb	scl517.1.1_243
Hbb-b1	4760.5	17149.9	1	1	97.6712	ri|2510039D09|ZX00056J15|AK011053|630-S	AK011053		ri|2510039D09|ZX00056J15|AK011053|630
Fgl1	22.7	116.9	0.9844	0.9994	99.5182	scl34887.7.1_10-S	NM_145594	Mfire1;MGC37822	scl34887.7.1_10
1110063F24Rik	101.2	557.9	0.9994	1	100.612	scl24913.11_38-S	NM_133889.2	AW011758	scl24913.11_38
Eya3	-0.2	55.6	0.5652	0.9969	106.35	scl014050.16_119-S	NM_010166.2		scl014050.16_119
Dscr1	56	145.3	0.9963	1	107.017	scl0001766.1_49-S	NM_019466.2	2410048A02Rik;Adapt78;CALP1L;MCIP1	scl0001766.1_49
Mrps12	665.4	1477.4	1	1	112.768	scl31573.3_3-S	NM_011885	Rpms12;rps12	scl31573.3_3
Cyp3a11	-1.4	51.6	0.4885	0.9963	116.595	scl0013112.1_193-S	NM_007818.2	AI256190;Cyp3a;IIIAm1;Pcn	scl0013112.1_193
Orm1	70.9	293.8	0.9975	1	125.014	scl018405.4_2-S	NM_008768.1	Agp-1;Agp-2;Orm-1	scl018405.4_2
F10	58.4	191.2	0.9963	1	144.493	scl34064.10_3-S	NM_007972.2	Cf10;fX	scl34064.10_3
Etohd2	120.2	339	0.9994	1	159.22	scl013996.2_4-S			scl013996.2_4
Mup3	7.6	110.3	0.8871	0.9994	193.739	scl017842.1_177-S	NM_010845	MUP III;Mup-3;MUP15	scl017842.1_177
Psmd8	67.4	1478.7	0.9975	1	371.334	scl0057296.1_256-S	NM_026545.1	6720456J22Rik;C76433	scl0057296.1_256
1110005F07Rik	79.5	2053.3	0.9988	1	371.334	scl23602.11_383-S	NM_025383		scl23602.11_383

## Sheet: D
Commonly upregulated genes (Diff_Score≥13/P≤0.05) in three different tissues (brain, liver and spleen) of Mcph1gt/gt mice.
Gene	Accession	Target ID
Erdr1	NM_133362.1	scl00170942.1_90
Dscr1l2	NM_022980.2	scl0053902.1_216
9430098E02Rik	XM_134253.3	scl33704.1.431_29
1110060F11Rik	NM_026395.1	scl23442.8_471
Gpiap1	NM_016739.2	scl0053872.2_123
2410166I05Rik	NM_029759.2	scl23686.4_28
9230105E10Rik	NM_175677	scl00319236.1_170
Rnpep	NM_145417	scl16258.13.1_64
Ciapin1	NM_134141.2	scl00109006.2_49
Hdac1	NM_008228.1	scl015181.3_0
Insig2	NM_133748.1	scl000986.1_622
Spon2	NM_133903.2	scl26719.6_100
Gdi3	NM_008112.2	scl014569.11_60
Ccdc9	NM_172297.1	scl0243846.1_330
Sfrs16	NM_016680	scl31678.22.1_32
Frag1	NM_145583.1	scl000187.1_133
LOC382058	XM_356133.1	GI_38089675
Etohd2		scl013996.2_4
Klhdc2	NM_027117.1	scl43155.10.40_7
4930481A15Rik	XM_148889.4	scl074931.4_20
1810011E08Rik		scl34807.5_39
A130065C13Rik	AK037935	ri|A130065C13|PX00124A20|AK037935|681
Hbb-b1	AK011067	ri|2510040I07|ZX00060E20|AK011067|627
Drbp1	NM_153405.1	GI_23510272
6720407G21Rik	XM_133272	scl0077733.1_129
Rab6	NM_024287.2	scl00072.1_32
Mrps12	NM_011885.2	scl0024030.2_121
Mrpl48	NM_026971.2	scl000226.1_3
Pnrc2	NM_026383.1	scl23667.4_0
Eya3	NM_010166.2	scl014050.16_119
Eif3s2	NM_018799	scl0002776.1_66
Mrps12	NM_011885	scl31573.3_3
1110063F24Rik	NM_133889.2	scl24913.11_38
AI838661	NM_133884.1	scl24858.5.1_216
1110005F07Rik	NM_025383	scl23602.11_383
Hbb-b1	AK011053	ri|2510039D09|ZX00056J15|AK011053|630
Rrm1	NM_009103	scl32275.19.1_102
B230312I18Rik	NM_172740.1	scl32830.4_10
Psmd8	NM_026545.1	scl0057296.1_256

## Sheet: E
Commonly upregulated genes (Diff_Score≥13/P≤0.05) in brain and liver of Mcph1gt/gt mice.
Gene	Accession	Target ID
Fbxl17	XM_128716.2	scl49708.14_0
Serpina3g	XM_354694.1	scl020715.6_281
Erdr1	NM_133362.1	scl00170942.1_90
Wrnip1	NM_030215	scl0003612.1_5
Dscr1l2	NM_022980.2	scl0053902.1_216
9430098E02Rik	XM_134253.3	scl33704.1.431_29
1110018J18Rik	NM_025370.1	scl066129.2_5
Robo1	NM_019413.1	scl019876.3_41
Ddhd1	NM_176845	scl45663.15_583
Mmp14	NM_008608.2	scl46305.13_322
1500031H04Rik	NM_025893.1	scl54605.3_321
1110060F11Rik	NM_026395.1	scl23442.8_471
Gpiap1	NM_016739.2	scl0053872.2_123
Ccrk	NM_053180.2	scl44672.5.1_29
2410166I05Rik	NM_029759.2	scl23686.4_28
9230105E10Rik	NM_175677	scl00319236.1_170
Rnpep	NM_145417	scl16258.13.1_64
Rpl13a	NM_009438.3	gi_32129296_ref_NM_009438.3__526
AA175286	NM_010156.2	scl29327.6.1_41
Ciapin1	NM_134141.2	scl00109006.2_49
Hdac1	NM_008228.1	scl015181.3_0
Insig2	NM_133748.1	scl000986.1_622
Spon2	NM_133903.2	scl26719.6_100
D6Wsu176e	NM_138587.3	scl29247.11.6_29
Cai	NM_009787.1	scl29051.11.1_27
Gdi3	NM_008112.2	scl014569.11_60
Ccdc9	NM_172297.1	scl0243846.1_330
1110033J19Rik	NM_025405.1	scl066184.1_108
Sfrs16	NM_016680	scl31678.22.1_32
Frag1	NM_145583.1	scl000187.1_133
LOC382058	XM_356133.1	GI_38089675
Etohd2		scl013996.2_4
Klhdc2	NM_027117.1	scl43155.10.40_7
4930481A15Rik	XM_148889.4	scl074931.4_20
1110015E22Rik	NM_024228.1	scl32054.9.1_17
1810011E08Rik		scl34807.5_39
A130065C13Rik	AK037935	ri|A130065C13|PX00124A20|AK037935|681
Hbb-b1	AK011067	ri|2510040I07|ZX00060E20|AK011067|627
Drbp1	NM_153405.1	GI_23510272
Fbxo44	NM_173401.1	scl23522.8_437
6720407G21Rik	XM_133272	scl0077733.1_129
1110049F12Rik	NM_025411.2	scl066193.1_138
Rab6	NM_024287.2	scl00072.1_32
Riok3	NM_024182.2	scl066878.10_113
Mrps12	NM_011885.2	scl0024030.2_121
Mrpl48	NM_026971.2	scl000226.1_3
Pnrc2	NM_026383.1	scl23667.4_0
Eya3	NM_010166.2	scl014050.16_119
Eif3s2	NM_018799	scl0002776.1_66
Mrps12	NM_011885	scl31573.3_3
1110063F24Rik	NM_133889.2	scl24913.11_38
AI838661	NM_133884.1	scl24858.5.1_216
1110005F07Rik	NM_025383	scl23602.11_383
Hbb-b1	AK011053	ri|2510039D09|ZX00056J15|AK011053|630
4931440N07Rik	NM_201368.1	scl0381560.1_274
Rrm1	NM_009103	scl32275.19.1_102
B230312I18Rik	NM_172740.1	scl32830.4_10
Psmd8	NM_026545.1	scl0057296.1_256

## Sheet: F
Commonly upregulated genes (Diff_Score≥13/P≤0.05) in brain and spleen of Mcph1gt/gt mice.
Gene	Accession	Target ID
Ube2g1	NM_025985.2	scl0001439.1_101
Bcl2a1b	NM_007534	scl0012045.1_114
Magmas	NM_025571.1	scl0001814.1_15
Hspd1	NM_010477.2	scl000928.1_86
1810003N24Rik	NM_025443.1	scl40498.6_62
Bhlhb9	NM_198161.1	scl54620.5_512
Wars	NM_011710.2	scl0002319.1_93
Stk17b	NM_133810.2	scl16765.7_355
Psmd7	NM_010817.1	scl000612.1_15
Gemin6	NM_026053.1	scl0067242.1_20
LOC224163	XM_147236.2	GI_38079951
Uap1	NM_133806.2	scl15961.15.1_3
Lamp2	NM_010685.2	scl0002992.1_44
Sqle	NM_009270.2	scl0002494.1_23
Ilf2	NM_026374	scl067781.14_22
Erdr1	NM_133362.1	scl00170942.1_90
Hrb	NM_010472.1	scl17740.13_298
2700092H06Rik	XM_132529.2	scl078325.1_150
2810008M24Rik		scl44416.3_31
Hadhb	NM_145558	scl0004026.1_20
LOC382063	XM_356143.1	GI_38089740
Gars	NM_180678.2	scl30011.18.1_29
Tcp1	NM_013686	scl0001621.1_13
Dscr1l2	NM_022980.2	scl0053902.1_216
Ppil3	NM_027351	scl0001010.1_64
Dnm1l	NM_152816.1	scl0074006.2_261
Gcs1	NM_020619.2	scl29846.4_459
D19Wsu12e	XM_358328.1	scl52590.16_341
4933439J20Rik	AK030267	ri|4933439J20|PX00021H18|AK030267|2454
Ube2g1	NM_025985.2	scl067128.8_166
Prkrip1	NM_025774.1	scl066801.6_14
Slc2a3	NM_011401.2	scl28438.14_163
Mrrf	NM_026422.1	scl0003223.1_29
Wdr1	NM_011715.1	scl26663.16_246
2410042D21Rik	NM_024254.2	scl0003391.1_153
9430098E02Rik	XM_134253.3	scl33704.1.431_29
Nqo2	NM_020282.2	scl0003622.1_15
Abcf2	NM_013853.1	scl0027407.2_100
1110017C15Rik	NM_025391.1	scl000639.1_71
LOC382020	XM_356090.1	GI_38089330
1110021H02Rik	NM_025388.1	scl15945.4.1_0
1110017C15Rik	NM_025391	scl066164.1_0
D930035B09Rik	NM_172876.1	scl24859.6.20_8
Cdk4	NM_009870.2	scl0003913.1_65
C86073	NM_001033190.1	GI_85701607
1600019D15Rik	NM_028975.2	scl0067878.2_53
Ccng1	NM_009831.1	scl0012450.2_17
Tcp1	NM_013686.1	scl51111.10.24_9
Sumo2	NM_133354	scl0001373.1_2
Anxa2	NM_007585.2	scl36760.13.1_118
Atp5b	NM_016774.2	scl38298.13.28_46
Rnf144	NM_080563.2	scl42588.12.910_0
Azi2	NM_013727.2	scl0003596.1_1065
Nsep1	NM_011732.1	scl0002680.1_6
Smpdl3a	NM_020561.1	scl38908.9.1_88
0610009I22Rik	NM_025646	scl20251.8_441
2810405J04Rik	NM_133747.1	scl072722.1_216
2600016B03Rik	NM_026453.1	scl34969.6.1_9
Mrps31	NM_020560.1	scl000657.1_20
Ap2m1	NM_009679.1	scl011773.12_241
1110060F11Rik	NM_026395.1	scl23442.8_471
LOC386333	XM_359174.1	GI_38081438
4930453N24Rik	XM_148353.3	GI_38079837
D5Wsu178e	NM_027652.1	scl0028042.1_319
Gpiap1	NM_016739.2	scl0053872.2_123
Cnot7	AK007767	ri|1810044B19|ZX00043A03|AK007767|732
Sdhb	NM_023374.3	scl067680.5_8
Nap1l1	NM_015781.2	scl0003917.1_104
Cnot7	NM_011135.2	scl000572.1_890
2410166I05Rik	NM_029759.2	scl23686.4_28
Ube1c	NM_011666.1	GI_6755920
9230105E10Rik	NM_175677	scl00319236.1_170
Aprin	NM_175310.3	scl00100710.2_193
Dtnbp1	NM_025772.3	scl44037.11.1_29
Drbp1	NM_178090.2	scl0003137.1_53
Rnpep	NM_145417	scl16258.13.1_64
Stard3nl	NM_024270.1	scl44251.7.1_3
Tank	NM_011529.1	scl0003091.1_92
Mfn2	NM_133201.1	scl23528.23_0
BC004022	XM_134557.1	scl34521.8.1_20
Pxmp3	NM_008994.2	scl22415.7_11
Dnajc12	NM_013888.1	scl38846.4.1_6
Ciapin1	NM_134141.2	scl00109006.2_49
Sep-15	NM_053102.1	scl0002080.1_55
Cycs	NM_007808.2	scl013063.3_11
Txnl4	NM_025299.1	scl027366.4_62
Pltp	NM_011125.1	scl0003032.1_86
Rpp14	NM_025938.1	scl46641.9_62
2600001B17Rik	NM_172947.1	scl0268490.8_24
Ipo9	XM_129442.3	scl00226432.1_235
Hdac1	NM_008228.1	scl015181.3_0
Rassf4	NM_178045.3	scl00213391.1_239
Fbxo3	NM_212433.1	scl0003006.1_310
Rbm28	NM_133925.1	scl0068272.1_99
Fnta	NM_008033.2	scl34985.11_48
Insig2	NM_133748.1	scl000986.1_622
Copb2	NM_015827.1	scl36580.22.1_188
		NeoR
Ttc1	NM_133795.1	scl0066827.2_11
Rab6	BC019118	scl00030.1_17
Rdh11	NM_021557	scl42308.7_397
Ccng1	NM_009831.1	scl0001479.1_77
1700048E23Rik	NM_028521.1	scl073373.8_41
0610007P22Rik	NM_026676.1	scl000093.1_57_REVCOMP
Eif1ay	NM_025437	scl54514.7_209
Spon2	NM_133903.2	scl26719.6_100
1110060F11Rik	NM_026395.1	scl0002748.1_8
Naca	NM_013608.2	scl0017938.1_31
Nfil3	NM_017373.2	scl43966.3_250
Dld	NM_007861	scl0002332.1_7
Gdi3	NM_008112.2	scl014569.11_60
B3galt6	NM_080445.2	scl00117592.2_262
Ccdc9	NM_172297.1	scl0243846.1_330
Gmds	NM_146041.1	scl44126.11.1_57
LOC381820	XM_355822.1	GI_38085360
Sfrs16	NM_016680	scl31678.22.1_32
1700034H14Rik	NM_025969.1	scl067105.6_6
Dars	NM_145507.1	scl16334.7.1_2
Plrg1	NM_016784.2	scl23055.15.1_74
Atp6v0d1	NM_013477.2	scl000737.1_18
Vamp4	AF061516	scl000897.1_256
Frag1	NM_145583.1	scl000187.1_133
D10Ertd322e	NM_026065.2	scl067270.3_15
BC023823	NM_153566.1	scl24984.5.1_10
LOC382058	XM_356133.1	GI_38089675
Dbi	NM_007830.2	scl16375.7_22
Psma4	NM_011966	scl026441.8_13
Eps8	NM_007945.1	scl28264.25.1_26
Rab8a	NM_023126.2	scl0017274.1_278
X83328	NM_025275.2	scl013929.8_8
Rgl1	NM_016846.2	scl019731.1_197
Abcd3	NM_008991.1	scl0019299.2_231
Etohd2		scl013996.2_4
C78212	NM_198176.1	scl0380601.1_239
Cct4	NM_009837.1	scl012464.14_38
Cope	NM_021538.1	scl059042.7_5
Klhdc2	NM_027117.1	scl43155.10.40_7
4930481A15Rik	XM_148889.4	scl074931.4_20
2610319K07Rik	NM_028264.2	scl25655.8_229
Ppm1b	NM_011151.1	scl0019043.1_76
0610033H09Rik	NM_025338.1	scl24605.2.1_63
AU067744	NM_172529.1	scl00214505.2_7
Grsf1	NM_178700.2	scl26406.12_265
Map3k6	NM_016693	scl24866.28.1_30
Pum2	NM_030723.1	scl0080913.2_173
Rhobtb3	NM_028493.1	scl0073296.1_60
Sdcbp	NM_016807.1	scl0053378.2_54
Adh5	NM_007410.2	scl22543.4.4_13
1810011E08Rik		scl34807.5_39
A130065C13Rik	AK037935	ri|A130065C13|PX00124A20|AK037935|681
Dusp1	NM_013642.1	scl50147.4_283
2810405I11Rik	NM_024190.1	scl0067064.2_260
Cryzl1	NM_133679.1	scl0001778.1_28
LOC333744	XM_289803.2	GI_38083108
Strap	NM_011499.1	scl29414.11.4_112
Abcf2	NM_013853.1	scl027407.6_4
Vps26	NM_133672	scl37899.10_160
C80879	NM_011931.1	scl026374.8_4
Sypl	NM_013635.2	scl0019027.2_109
Rpl7	NM_011291	scl019989.6_6
Rap2c	NM_172413.1	scl54266.5_48
Rbm8	NM_025875.1	scl0060365.1_251
AB041568	AK089856	ri|F830033L24|PL00007A19|AK089856|4767
Hbb-b1	AK011067	ri|2510040I07|ZX00060E20|AK011067|627
Pes1	NM_022889.2	scl0064934.1_269
Drbp1	NM_153405.1	GI_23510272
Dscr1l2	NM_022980.2	scl053902.1_215
Cul4b	NM_028288.3	scl072584.1_264
LOC209405	XM_142315.2	GI_38093939
Ube2g1	NM_025985.2	scl0067128.1_219
Fos	NM_010234.2	scl42959.4_58
Chordc1	NM_025844.1	scl066917.11_233
Mbnl1	NM_020007.2	scl23145.17_313
0610012D09Rik	NM_021554.2	scl32110.5.1_11
Clic4	XM_124389.1	scl029876.1_59
6720407G21Rik	XM_133272	scl0077733.1_129
Rab6	NM_024287.2	scl00072.1_32
Farsla	NM_025648.1	scl0066590.2_213
Rdx	NM_009041	scl019684.7_10
2610528E23Rik	XM_148465.1	scl48370.15.1_106
Mrps12	NM_011885.2	scl0024030.2_121
Mrpl48	NM_026971.2	scl000226.1_3
Pnrc2	NM_026383.1	scl23667.4_0
Eya3	NM_010166.2	scl014050.16_119
MGC67181	NM_198619.1	scl0075615.1_61
Eif3s2	NM_018799	scl0002776.1_66
Mrps12	NM_011885	scl31573.3_3
1110063F24Rik	NM_133889.2	scl24913.11_38
AI838661	NM_133884.1	scl24858.5.1_216
1110005F07Rik	NM_025383	scl23602.11_383
Hbb-b1	AK011053	ri|2510039D09|ZX00056J15|AK011053|630
Rrm1	NM_009103	scl32275.19.1_102
B230312I18Rik	NM_172740.1	scl32830.4_10
Psmd8	NM_026545.1	scl0057296.1_256

## Sheet: G
Commonly upregulated genes (Diff_Score≥13/P≤0.05) in liver and spleen of Mcph1gt/gt mice.
Gene	Accession	Target ID
Lars		scl51469.24.1_0
Rab6	NM_024287.2	scl00072.1_32
Dexi	NM_021428.3	scl058239.1_71
Ccdc9	NM_172297.1	scl0243846.1_330
Cyp2c70	NM_145499.1	scl52508.10.1_140
Erdr1	NM_133362	scl0170942.1_210
Hspbap1	NM_175111.2	scl0066667.2_152
Rnpep	NM_145417	scl16258.13.1_64
2810441C07Rik	NM_172415.2	scl23613.33_174
2010106G01Rik	NM_023220.1	scl0066552.1_146
Ube2l3	XM_148568.1	scl48709.7_108
Iqgap1	NM_016721.1	scl0029875.2_286
Dscr1l2	NM_022980.2	scl0053902.1_216
Txnl4b	NM_175646.2	scl33340.4_635
Drbp1	NM_153405.1	GI_23510272
Stambp	NM_024239.1	scl28793.10_326
Bcl6	NM_009744.2	scl48625.8_280
Frag1	NM_145583.1	scl32282.14.1_19
6720407G21Rik	XM_133272	scl0077733.1_129
Pecam1	NM_008816	scl39433.17_301
Dpp8	NM_028906.2	scl36817.19_229
Sfrs10	NM_009186	scl020462.9_41
D2Bwg0891e	NM_026797.1	scl052840.5_2
Pitpnb	NM_019640.2	scl27424.11_172
Erdr1	NM_133362.1	scl00170942.1_90
9230105E10Rik	NM_175677	scl00319236.1_170
9430098E02Rik	XM_134253.3	scl33704.1.431_29
Klhdc2	NM_027117.1	scl43155.10.40_7
Rgs16	NM_011267.1	scl17359.5_60
1110060F11Rik	NM_026395.1	scl23442.8_471
Lst1	XM_359281.1	scl016988.2_22
Gpiap1	NM_016739.2	scl0003202.1_259
D430022H17Rik	AK084998	ri|D430022H17|PX00194G21|AK084998|1077
Nup210	NM_018815.1	scl28688.42_395
Smpdl3b	NM_133888.1	scl23726.8.8_267
Sh3bgrl3	NM_080559.1	scl23697.3.1_58
Etohd2		scl013996.2_4
Iap	NM_010490	scl0015598.1_13
Mup3	NM_010845	scl017842.1_177
Sfrs16	NM_016680	scl31678.22.1_32
Rrm1	NM_009103	scl32275.19.1_102
A130065C13Rik	AK037935	ri|A130065C13|PX00124A20|AK037935|681
Fbxo6b	NM_015797.1	scl23523.7.1_20
Cklfsf7	NM_133978.1	scl0003450.1_9
Gdi3	NM_008112.2	scl014569.11_60
Hdac1	NM_008228.1	scl015181.3_0
Iap	NM_010490.2	GI_24475922
Hbb-b1	AK011067	ri|2510040I07|ZX00060E20|AK011067|627
LOC382058	XM_356133.1	GI_38089675
Gpiap1	NM_016739.2	scl0053872.2_123
B230312I18Rik	NM_172740.1	scl32830.4_10
4930481A15Rik	XM_148889.4	scl074931.4_20
Csnk2a2	NM_009974.2	scl013000.1_10
Mrpl48	NM_026971.2	scl000226.1_3
Eya3	NM_010166.2	scl014050.16_119
1810011E08Rik		scl34807.5_39
4921521J11Rik	NM_027590.1	scl0070885.2_95
Trim34	NM_030684.1	scl0094094.2_63
Spon2	NM_133903.2	scl26719.6_100
Hbb-b1	AK011053	ri|2510039D09|ZX00056J15|AK011053|630
Frag1	NM_145583.1	scl000187.1_133
Mrps12	NM_011885.2	scl0024030.2_121
Insig2	NM_133748.1	scl000986.1_622
Folr2	NM_008035	scl30960.6.1_9
Ciapin1	NM_134141.2	scl00109006.2_49
2410166I05Rik	NM_029759.2	scl23686.4_28
1110005F07Rik	NM_025383	scl23602.11_383
1110063F24Rik	NM_133889.2	scl24913.11_38
AI838661	NM_133884.1	scl24858.5.1_216
Mrps12	NM_011885	scl31573.3_3
Eif3s2	NM_018799	scl0002776.1_66
Pnrc2	NM_026383.1	scl23667.4_0
Psmd8	NM_026545.1	scl0057296.1_256
